# Supplementary material for: Expedient (3+3)-annulation of carbonyl ylides with azaoxyallyl cations: formal access to oxa-benzo[c]azepin-3-ones
Source: Royal Society of Chemistry journal article supplement (doi:10.1039/d4cc04946b), 2024-01-01

Supporting Information

**Expedient (3+3)-annulation of carbonyl ylides with azaoxyallyl cations:  
formal access to oxa-benzo[*c*]azepin-3-ones**

**Table of Contents**

|    |                                                                                                                                                |         |
|----|------------------------------------------------------------------------------------------------------------------------------------------------|---------|
| 1  | General Information                                                                                                                            | S2      |
| 2  | Crystal Structure and Data of <b>3ra</b>                                                                                                       | S3-S4   |
| 3  | Optimization of the Reaction Conditions                                                                                                        | S4-S6   |
| 4  | General Procedure for the Preparation of $\alpha$ -Diazoesters                                                                                 | S6-S7   |
| 5  | General Procedure for the Preparation of $\alpha$ Halo-Hydroxamate                                                                             | S7      |
| 6  | Procedure for the Synthesis of <b>3</b> and Scale-up Synthesis                                                                                 | S7      |
| 7  | Procedure for the Post-Synthetic Modifications                                                                                                 | S7-S8   |
| 8  | HPLC Chromatogram                                                                                                                              | S9-S10  |
| 9  | Characterization Data of <b>1a-s</b>                                                                                                           | S11-S16 |
| 10 | Characterization Data of <b>2a-k</b>                                                                                                           | S17-S18 |
| 11 | Characterization Data of products <b>3aa-sa</b> , <b>3ab-ai</b> and <b>4-8</b>                                                                 | S19-S33 |
| 12 | References                                                                                                                                     | S33     |
| 13 | NMR ( $^1\text{H}$ , $^{13}\text{C}$ and $^{19}\text{F}$ ) Spectra of <b>1a-s</b> , <b>2a-k</b> , <b>3aa-sa</b> , <b>3ab-ai</b> and <b>4-8</b> | S34-S84 |

**General Information:** Ethyl benzoyl acetate, acetophenones, *o*-benzylhydroxylamine hydrochloride, HFIP ( $\geq 99\%$ ), NaH (60 % dispersion in mineral oil), diethyl carbonate (99%), 2-(trimethylsilyl)phenyl trifluoromethanesulfonate ( $>95\%$ ), 2-bromoisobutyryl bromide ( $>98\%$ ), Rh<sub>2</sub>(OAc)<sub>4</sub>, Pd(PPh<sub>3</sub>)<sub>4</sub> (99 %), Pd(PPh<sub>3</sub>)<sub>2</sub>Cl<sub>2</sub> (99 %) and TEMPO (98%) were purchased from Aldrich and TCI, and used as received. Na<sub>2</sub>CO<sub>3</sub> ( $>99\%$ ), K<sub>2</sub>CO<sub>3</sub> (98%), Cs<sub>2</sub>CO<sub>3</sub> (99%), DIPEA ( $\geq 99\%$ ), DBU ( $\geq 99\%$ ), DABCO (99%) and Et<sub>3</sub>N ( $>99\%$ ) were procured from Merck and used as received. CH<sub>3</sub>CN and CH<sub>2</sub>Cl<sub>2</sub> were dried prior as per the standard procedure prior to use. SRL silica gel G/GF 254 plates were used for analytical TLC and SRL silica gel (100-200 mesh) was used for column chromatography. Bruker Avance III 400, 500 and 600 MHz NMR spectrometers were used to record (<sup>1</sup>H, <sup>13</sup>C and <sup>19</sup>F) spectra using CDCl<sub>3</sub> as the solvent and tetramethylsilane (TMS) as an internal standard. Chemical shifts ( $\delta$ ) and spin-spin coupling constant (*J*) are reported in parts per million and hertz (Hz), respectively, and to describe peak patterns following abbreviations used when appropriate: s = singlet, d = doublet, t = triplet, q = quartet and m = multiplet. Melting point of the products was measured on Büchi melting point apparatus, MPB-540. Open capillary tubes were used for the measurements and are uncorrected. Mestre nova software was used throughout the spectral analysis. Q-ToF ESI-MS instrument Agilent (model: 6546 LC/Q-TOF) was used for recording HRMS data. Infrared spectra were recorded on Perkin Elmer FT-IR instrument. Single crystal X-ray data of **3ra** was collected on a Bruker SMART APEX equipped with a CCD area detector using Mo/ $K\alpha$  radiation and the structure was solved by direct method using SHELXL-19 (Göttingen, Germany).

**Sample Preparation for Crystal Growth.** The compound **3ra** (10 mg) was dissolved in a mixture of CHCl<sub>3</sub> (1.0 ml) and CH<sub>3</sub>CN (1.0 ml) and kept at room temperature for slow evaporation (2 days). Block shaped colorless crystals were formed, which was subjected to X-ray diffraction.

**Crystal Structure and Data of 3ra.**

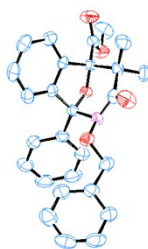

**Figure S1.** ORTEP diagram of methyl 2-(benzyloxy)-4,4-dimethyl-3-oxo-1-phenyl-1,2,3,4-tetrahydro-5H-1,5-epoxybenzo[*c*]azepine-5-carboxylate **3ra** (CCDC 2372696) with 50% ellipsoid. H-omitted for clarity.

|                                                 |                                                                                                          |
|-------------------------------------------------|----------------------------------------------------------------------------------------------------------|
| Identification code                             | <b>3ra</b>                                                                                               |
| Empirical formula                               | 'C <sub>27</sub> H <sub>25</sub> N O <sub>5</sub> '                                                      |
| Formula weight                                  | 443.48                                                                                                   |
| Crystal habit, colour                           | Block/Colorless                                                                                          |
| Temperature, <i>T</i> /K                        | 299 K                                                                                                    |
| Wavelength, $\lambda$ /Å                        | 0.71073                                                                                                  |
| Crystal system                                  | 'orthorhombic'                                                                                           |
| Space group                                     | 'P c a 21'                                                                                               |
| Unit cell dimensions                            | a = 18.656(4) Å<br>b = 9.9609(18) Å<br>c = 12.339(2) Å<br>$\alpha$ = 90<br>$\beta$ = 90<br>$\gamma$ = 90 |
| Volume, $V$ /Å <sup>3</sup>                     | 2293.0(7)                                                                                                |
| <i>Z</i>                                        | 4                                                                                                        |
| Calculated density, Mg·m <sup>-3</sup>          | 1.285                                                                                                    |
| Absorption coefficient, $\mu$ /mm <sup>-1</sup> | 0.089                                                                                                    |
| <i>F</i> (000)                                  | 936                                                                                                      |
| $\theta$ range for data collection              | 2.183 to 27.481                                                                                          |
| Limiting indices                                | -24 ≤ <i>h</i> ≤ 24, -12 ≤ <i>k</i> ≤ 12, -16 ≤ <i>l</i> ≤ 16                                            |
| Reflection collected / unique                   | 5248/3994                                                                                                |
| Completeness to $\theta$                        | 99.9%                                                                                                    |
| Absorption correction                           | Multi-scan                                                                                               |

|                                        |                                  |
|----------------------------------------|----------------------------------|
| Refinement method                      | 'SHELXL-2019/1 (Sheldrick 2019)' |
| Data / restraints / parameters         | 5248/1/ 301                      |
| Goodness-of-fit on $F^2$               | 1.201                            |
| Final $R$ indices [ $I > 2\sigma(I)$ ] | $R1 = 0.0603$ , $wR2 = 0.1014$   |
| $R$ indices (all data)                 | $R1 = 0.0922$ , $wR2 = 0.1133$   |

**Table S1** Optimization of the reaction conditions<sup>a</sup>

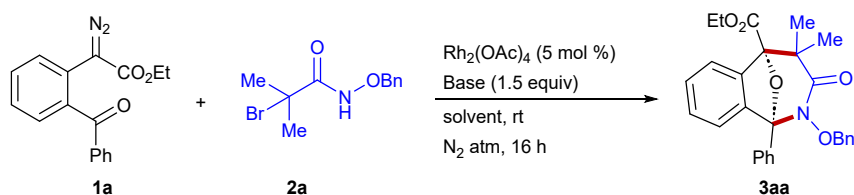

| Entry     | Catalyst                                      | Base                                      | Solvent                                          | Yield (%) <sup>b</sup> |
|-----------|-----------------------------------------------|-------------------------------------------|--------------------------------------------------|------------------------|
| 1         | $\text{Rh}_2(\text{OAc})_4$                   | $\text{Cs}_2\text{CO}_3$                  | $\text{CHCl}_3$                                  | 43                     |
| 2         | $\text{Rh}_2(\text{OAc})_4$                   | $\text{K}_2\text{CO}_3$                   | $\text{CHCl}_3$                                  | 65                     |
| 3         | $\text{Rh}_2(\text{OAc})_4$                   | $\text{Na}_2\text{CO}_3$                  | $\text{CHCl}_3$                                  | 30                     |
| 4         | $\text{Rh}_2(\text{OAc})_4$                   | $\text{NaHCO}_3$                          | $\text{CHCl}_3$                                  | trace                  |
| 5         | $\text{Rh}_2(\text{OAc})_4$                   | $\text{NEt}_3$                            | $\text{CHCl}_3$                                  | trace                  |
| 6         | $\text{Rh}_2(\text{OAc})_4$                   | DIPEA                                     | $\text{CHCl}_3$                                  | 53                     |
| 7         | $\text{Rh}_2(\text{OAc})_4$                   | DBU                                       | $\text{CHCl}_3$                                  | 58                     |
| 8         | $\text{Rh}_2(\text{OAc})_4$                   | DABCO                                     | $\text{CHCl}_3$                                  | 46                     |
| 9         | $\text{Rh}_2(\text{OAc})_4$                   | $\text{K}_2\text{CO}_3$                   | $\text{CH}_2\text{Cl}_2$                         | 73                     |
| 10        | $\text{Rh}_2(\text{OAc})_4$                   | $\text{K}_2\text{CO}_3$                   | $(\text{CH}_2\text{Cl})_2$                       | 61                     |
| 11        | $\text{Rh}_2(\text{OAc})_4$                   | $\text{K}_2\text{CO}_3$                   | Toluene                                          | n.d.                   |
| 12        | $\text{Rh}_2(\text{OAc})_4$                   | $\text{K}_2\text{CO}_3$                   | THF                                              | n.d.                   |
| 13        | $\text{Rh}_2(\text{OAc})_4$                   | $\text{K}_2\text{CO}_3$                   | $\text{CH}_3\text{CN}$                           | n.d.                   |
| 14        | $\text{Rh}_2(\text{OAc})_4$                   | $\text{K}_2\text{CO}_3$                   | TFE                                              | trace                  |
| 15        | $\text{Rh}_2(\text{OAc})_4$                   | $\text{K}_2\text{CO}_3$                   | MeOH                                             | n.d.                   |
| 16        | $\text{Rh}_2(\text{OAc})_4$                   | $\text{K}_2\text{CO}_3$                   | HFIP                                             | 68                     |
| <b>17</b> | <b><math>\text{Rh}_2(\text{OAc})_4</math></b> | <b><math>\text{K}_2\text{CO}_3</math></b> | <b><math>\text{CH}_2\text{Cl}_2</math>: HFIP</b> | <b>86</b>              |
| 18        | $\text{Rh}_2(\text{OAc})_4$                   | $\text{K}_2\text{CO}_3$                   | $\text{CHCl}_3$ : HFIP                           | 78                     |
| 19        | $\text{Rh}_2(\text{OAc})_4$                   | $\text{K}_2\text{CO}_3$                   | $(\text{CH}_2\text{Cl})_2$ : HFIP                | 58                     |

<sup>a</sup>Reaction conditions: **1a** (0.1 mmol), **2a** (0.11 mmol), Rh<sub>2</sub>(OAc)<sub>4</sub> (5 mol %), base (1.5 equiv), solvent (2 mL), N<sub>2</sub> atm 16 h. <sup>b</sup>Isolated yield. n.d. = not detected. HFIP = 1,1,1,3,3,3-Hexafluoroisopropanol. TFE = 2,2,2-Trifluoroethanol.

**Table S2** Screening of the equivalent of K<sub>2</sub>CO<sub>3</sub><sup>a</sup>

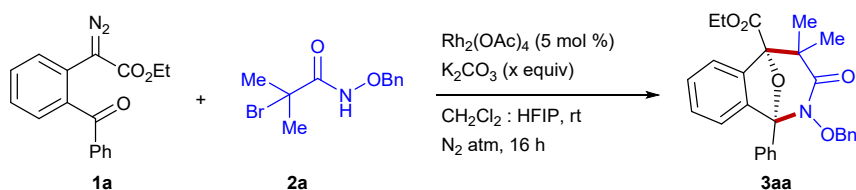

| Entry | Catalyst                       | Equivalent | Yield (%) <sup>b</sup> |
|-------|--------------------------------|------------|------------------------|
| 1     | K <sub>2</sub> CO <sub>3</sub> | 0.2        | n.d.                   |
| 2     | K <sub>2</sub> CO <sub>3</sub> | 0.5        | trace                  |
| 3     | K <sub>2</sub> CO <sub>3</sub> | 1          | 34                     |
| 4     | K <sub>2</sub> CO <sub>3</sub> | 1.2        | 73                     |
| 5     | K <sub>2</sub> CO <sub>3</sub> | 1.5        | 86                     |
| 6     | K <sub>2</sub> CO <sub>3</sub> | 1.7        | 75                     |
| 7     | K <sub>2</sub> CO <sub>3</sub> | 2.0        | 77                     |

<sup>a</sup>Reaction conditions: **1a** (0.1 mmol), **2a** (0.11 mmol), Rh<sub>2</sub>(OAc)<sub>4</sub> (5 mol %), K<sub>2</sub>CO<sub>3</sub> (x equiv) CH<sub>2</sub>Cl<sub>2</sub>:HFIP (1:1, 2 mL), rt, N<sub>2</sub> atm 16 h. <sup>b</sup>Isolated yield.

**Table S3** HPLC Analysis<sup>a</sup>

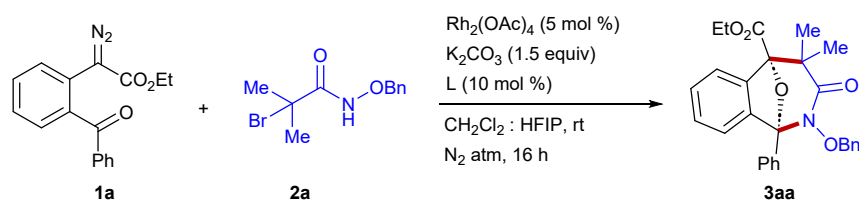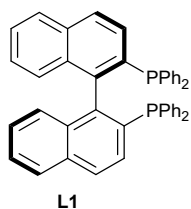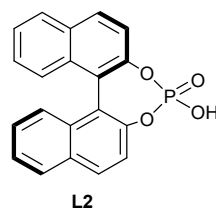

| Entry | Ligand | ee (%) <sup>b</sup> |
|-------|--------|---------------------|
| 1     | L1     | 0                   |
| 2     | L2     | 0                   |

<sup>a</sup>Reaction conditions: **1a** (0.1 mmol), **2a** (0.11 mmol), Rh<sub>2</sub>(OAc)<sub>4</sub> (5 mol %), K<sub>2</sub>CO<sub>3</sub> (1.5 equiv), L (10 mol %), CH<sub>2</sub>Cl<sub>2</sub>:HFIP (1:1, 2 mL), rt, N<sub>2</sub> atm 16 h. <sup>b</sup>Chiral HPLC Analysis.

### Procedure for the Preparation of $\alpha$ -Diazoesters **1**<sup>1</sup>

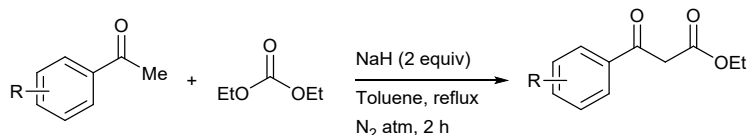

**Scheme S1**

**Step-I:** To a stirred suspension of NaH (6 mmol, 144 mg, 60% dispersion in mineral oil) in toluene (10 ml), acetophenone (3 mmol) was added at room temperature and stirred for 10 min. After that diethyl carbonate (12 mmol, 1416 mg) was added dropwise and refluxed for 2 h under N<sub>2</sub> atm. After completion (monitored by TLC), the reaction mixture cooled to room temperature and quenched with cold water, acidified with 2 M HCl solution and then extracted with ethyl acetate (3 x 30 mL). The combined organic layer was washed with brine (20 ml) and dried (Na<sub>2</sub>SO<sub>4</sub>). Evaporation of the solvent gave a residue that was purified on a silica gel column chromatography using ethyl acetate and hexane as an eluent to afford benzoyl acetates.

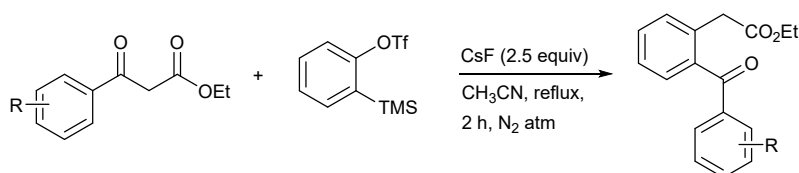

**Scheme S2**

**Step-II:** To a stirred solution of benzoyl acetate (2 mmol) and 2-(trimethylsilyl)-phenyl triflate (2.6 mmol, 775 mg) in CH<sub>3</sub>CN (8 ml), CsF (5 mmol, 760 mg) was added under N<sub>2</sub> atm in one portion and refluxed for 2 h. After completion (monitored by TLC), the reaction was cooled to room temperature and quenched with brine (20 ml) and extracted with ethyl acetate (3 x 20 mL). The combined organic solution was dried (Na<sub>2</sub>SO<sub>4</sub>) and the solvent was evaporated to give a residue that was purified on a silica gel column chromatography using ethyl acetate and hexane as eluent to afford benzoyl phenyl acetate.

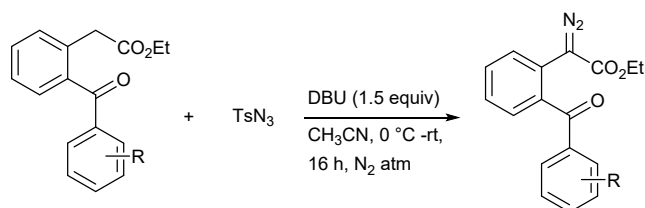

**Scheme S3**

**Step-III:** To a stirred solution of benzoyl phenyl acetate (2 mmol) and TsN<sub>3</sub> (2.4 mmol, 473 mg) in CH<sub>3</sub>CN (8 mL), was added DBU (3.0 mmol, 456 mg) dropwise at 0 °C and after 5 min, the reaction mixture was allowed to stir at room temperature for 16 h under N<sub>2</sub> atm. After completion (monitored by TLC), the reaction mixture was concentrated and purified on a silica gel column chromatography using ethyl acetate and hexane as eluent to afford diazoesters **1a-s**.

### Procedure for the Preparation of $\alpha$ -Halohydroxamate **2**<sup>2</sup>

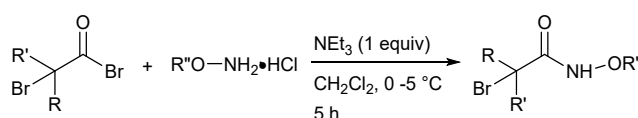

**Scheme S4**

To a stirred solution of *o*-hydroxylamine HCl (3 mmol) in CH<sub>2</sub>Cl<sub>2</sub> (10 mL), NEt<sub>3</sub> (3 mmol, 0.4 mL) was added at 0 °C. After 5 mins, corresponding bromide (3 mmol) was added dropwise and allowed to stir for 5 h. After completion (monitored by TLC), the reaction mixture was quenched with water and the organic layer washed with water (3 x 10 mL). Drying (Na<sub>2</sub>SO<sub>4</sub>) and evaporation of the solvent gave a residue that was purified on a silica gel column chromatography using ethyl acetate and hexane as eluent to afford halo hydroxamates **2a-k**.

**General Procedure for the Synthesis of 3.** To a stirred solution of  $\alpha$ -diazo esters **1** (0.1 mmol) and  $\alpha$ -halo-hydroxamate **2** (0.11 mmol) in CH<sub>2</sub>Cl<sub>2</sub>: HFIP (1:1, 2 mL), K<sub>2</sub>CO<sub>3</sub> (0.15 mmol, 21 mg) and Rh<sub>2</sub>(OAc)<sub>4</sub> (0.005 mmol, 2.3 mg) were added and the reaction mixture was allowed to stir at room temperature for 16 h under N<sub>2</sub> atm. After completion (monitored by TLC), the reaction mixture diluted with CH<sub>2</sub>Cl<sub>2</sub> (5 mL) and passed through a short bed of celite. The solvent was evaporated and the residue was purified on silica gel column chromatography using ethyl acetate and hexane as eluent to afford **3aa-sa** and **3ab-ai**.

**Scale-up Synthesis of 3aa.**  $\alpha$ -Diazo esters **3a** (1.0 mmol, 294 mg),  $\alpha$  halohydroxamate **2a** (1.1 mmol, 298 mg), K<sub>2</sub>CO<sub>3</sub> (1.5 mmol, 207 mg) and Rh<sub>2</sub>(OAc)<sub>4</sub> (0.05 mmol, 22 mg) were subjected to above-described procedure to afford **3aa** in 68% (312 mg) yield.

**Synthesis of 5.**<sup>3</sup> To a stirred solution of ethyl -2-(benzyloxy)-1-(4-bromophenyl)-4,4-dimethyl-3-oxo-1,2,3,4-tetrahydro-5H-1,5-epoxybenzo[*c*]azepine-5-carboxylate **3fa** (0.1 mmol, 53 mg) and phenylacetylene (0.3 mmol, 30 mg) in DMF (2 mL), CuBr (0.005 mmol, 1 mg), DIPEA (0.3 mmol, 38 mg) and Pd(PPh<sub>3</sub>)<sub>2</sub>Cl<sub>2</sub> (0.01 mmol, 7 mg) were added and the reaction mixture was allowed to stir at 100 °C for 12 h under N<sub>2</sub> atm. After completion (monitored by TLC), the reaction mixture was cooled to room temperature, diluted with ethyl acetate (5 mL) and washed

with water (5 mL). Drying ( $\text{Na}_2\text{SO}_4$ ) and evaporation of the solvent gave a residue that was purified on a silica gel column chromatography using ethyl acetate and hexane as eluent to afford **5** in 85% (48 mg) yield.

**Synthesis of 6.**<sup>4</sup> To a stirred solution of ethyl 2-(benzyloxy)-1-(4-bromophenyl)-4,4-dimethyl-3-oxo-1,2,3,4-tetrahydro-5H-1,5-epoxybenzo[*c*]azepine-5-carboxylate **3fa** (0.1 mmol, 53 mg) and phenyl boronic acid (0.11 mmol, 14 mg) in 1,4 dioxane (2 ml),  $\text{K}_2\text{CO}_3$  (0.2 mmol, 27 mg),  $\text{Pd}(\text{PPh}_3)_4$  (0.005 mmol, 5 mg) and  $\text{H}_2\text{O}$  (0.2 mL) were added and the reaction mixture was allowed to stir at 90 °C for 8 h under  $\text{N}_2$  atm. After completion (monitored by TLC), the reaction mixture was cooled to room temperature, diluted with ethyl acetate (5 mL) and washed with water (5 mL). Drying ( $\text{Na}_2\text{SO}_4$ ) and evaporation of the solvent gave a residue that was purified on a silica gel column chromatography using ethyl acetate and hexane as eluent to afford **6** in 82% (43 mg) yield.

**Synthesis of 7.**<sup>5</sup> To a stirred solution of ethyl 2-(benzyloxy)-4,4-dimethyl-3-oxo-1-phenyl-1,2,3,4-tetrahydro-5H-1,5-epoxybenzo[*c*]azepine-5-carboxylate **3aa** (0.1 mmol, 45 mg) in THF (2 mL) at 0 °C,  $\text{LiBH}_4$  (0.5 mmol, 11 mg) was added. The resulting reaction mixture was allowed warm up to room temperature and continued the stirring for 5 h under  $\text{N}_2$  atm. After completion (monitored by TLC), the reaction was quenched by saturated  $\text{NH}_4\text{Cl}$  (5 mL) and extracted with ethyl acetate (2 x 5 mL). Drying ( $\text{Na}_2\text{SO}_4$ ) and evaporation of the solvent gave a residue that was purified on a silica gel column chromatography using ethyl acetate and hexane as eluent to afford **7** in 79% (33 mg) yield.

**Synthesis of 8.**<sup>6</sup> To a stirred solution of ethyl 2-(benzyloxy)-4,4-dimethyl-3-oxo-1-phenyl-1,2,3,4-tetrahydro-5H-1,5-epoxybenzo[*c*]azepine-5-carboxylate **3aa** (0.1 mmol, 45 mg) in  $\text{CH}_3\text{CN}:\text{H}_2\text{O}$  (9:1, 2 mL),  $\text{Mo}(\text{CO})_6$  (0.12 mmol, 32 mg) was added. The resulting mixture was then stirred at 90 °C for 6 h. After completion (monitored by TLC), the reaction mixture diluted with ethyl acetate (5 mL) and passed through a short bed of celite. The solvent was evaporated and the residue was purified on silica gel column chromatography using ethyl acetate and hexane as eluent to afford **8** in 75% (26 mg) yield.



### HPLC Chromatogram:

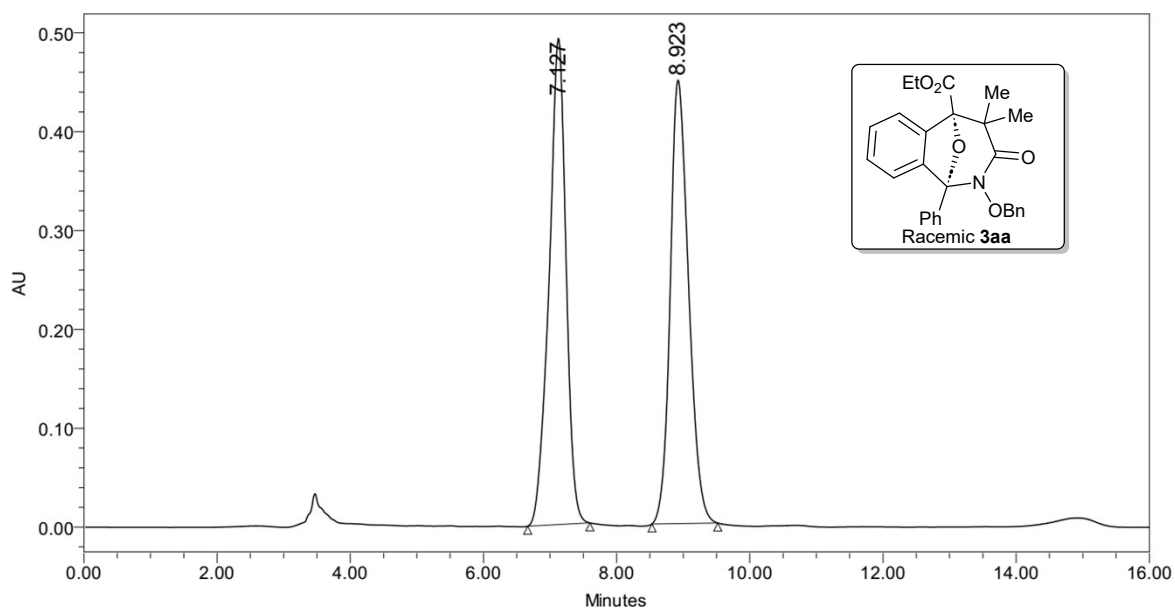

|   | RT    | Area    | % Area | Height |
|---|-------|---------|--------|--------|
| 1 | 7.127 | 8661704 | 50.22  | 491654 |
| 2 | 8.923 | 8584170 | 49.78  | 448483 |

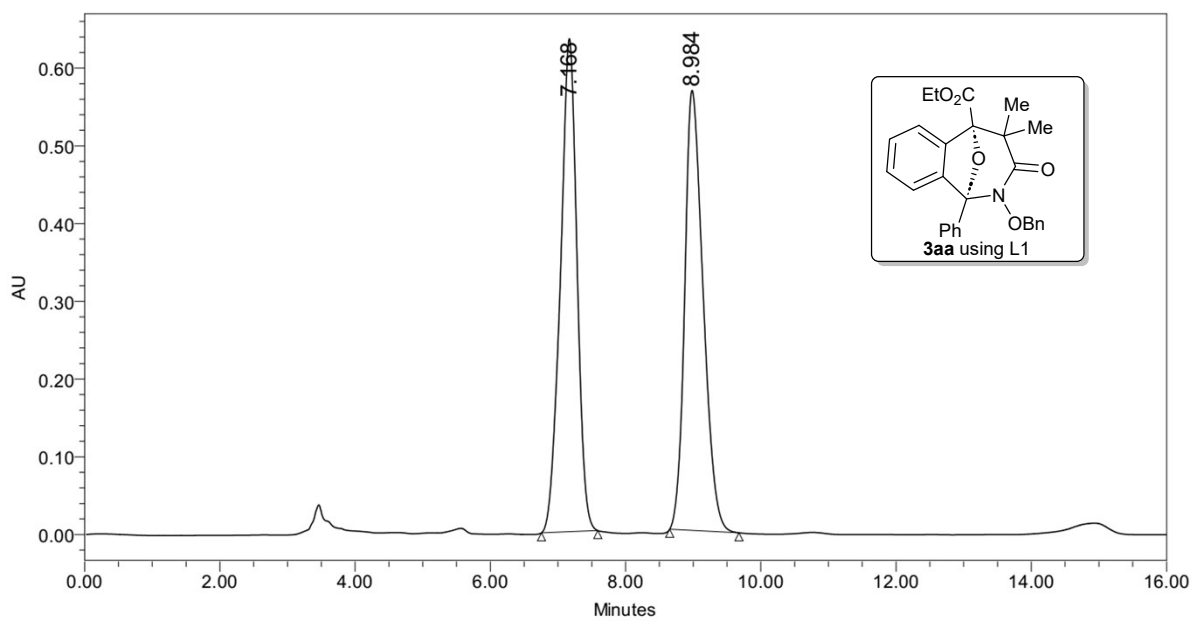

|   | RT    | Area     | % Area | Height |
|---|-------|----------|--------|--------|
| 1 | 7.168 | 10796391 | 50.15  | 634207 |
| 2 | 8.984 | 10730490 | 49.85  | 565977 |

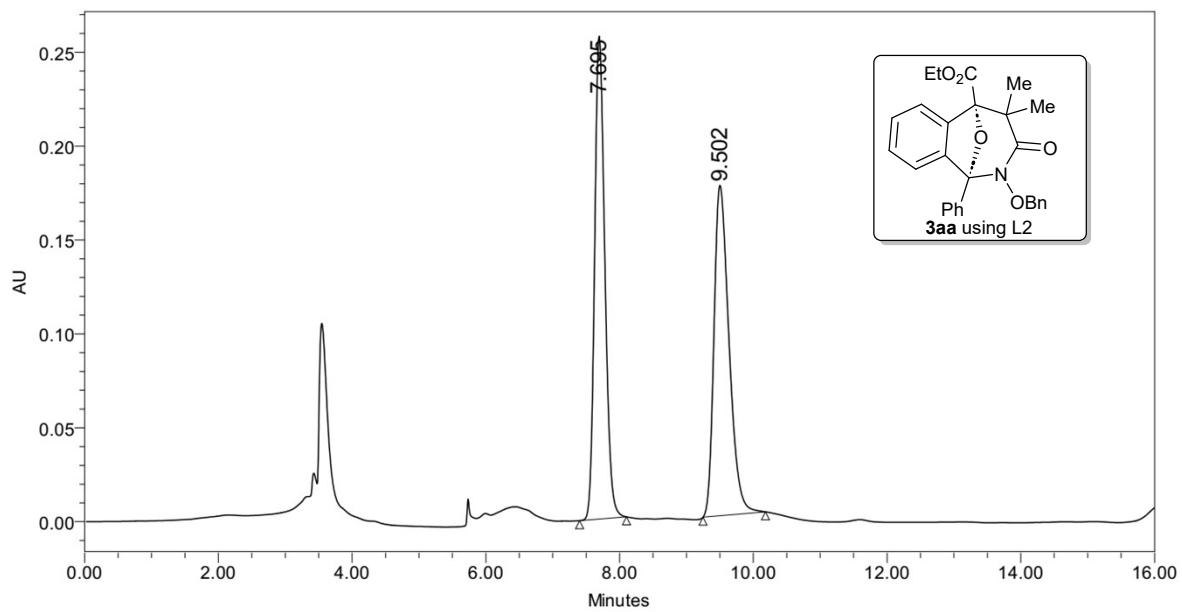

|   | RT    | Area    | % Area | Height |
|---|-------|---------|--------|--------|
| 1 | 7.695 | 2732783 | 49.89  | 257134 |
| 2 | 9.502 | 2744964 | 50.11  | 175989 |

## Characterization Data of the $\alpha$ -Diazo esters

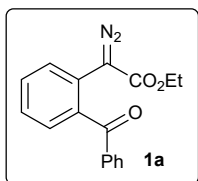

**Ethyl 2-(2-benzoylphenyl)-2-diazoacetate 1a.**<sup>1a</sup> Yellow viscous liquid; <sup>1</sup>H NMR (400 MHz, CDCl<sub>3</sub>)  $\delta$  7.80 (d,  $J$  = 7.2 Hz, 2H), 7.60-7.54 (m, 2H), 7.53-7.50 (m, 2H), 7.45 (t,  $J$  = 8.0 Hz, 2H), 7.42-7.38 (m, 1H), 4.10 (q,  $J$  = 7.2 Hz, 2H), 1.13 (t,  $J$  = 7.2 Hz, 3H).

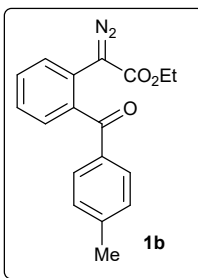

**Ethyl 2-diazo-2-(2-(4-methylbenzoyl)phenyl)acetate 1b.**<sup>1a</sup> Yellow viscous liquid; <sup>1</sup>H NMR (400 MHz, CDCl<sub>3</sub>)  $\delta$  7.69 (d,  $J$  = 8.0 Hz, 2H), 7.55-7.48 (m, 3H), 7.40-7.36 (m, 1H), 7.23 (d,  $J$  = 8.0 Hz, 2H), 4.10 (q,  $J$  = 7.2 Hz, 2H), 2.42 (s, 3H), 1.13 (t,  $J$  = 7.2 Hz, 3H).

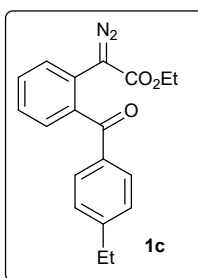

**Ethyl 2-diazo-2-(2-(4-ethylbenzoyl)phenyl)acetate 1c.** Analytical TLC on silica gel, 1:9 ethyl acetate/hexane  $R_f$  = 0.40; yellow viscous liquid; yield 85% (230 mg); <sup>1</sup>H NMR (400 MHz, CDCl<sub>3</sub>)  $\delta$  7.72 (d,  $J$  = 8.0 Hz, 2H), 7.57-7.49 (m, 3H), 7.40-7.36 (m, 1H), 7.26 (d,  $J$  = 8.4 Hz, 2H), 4.10 (q,  $J$  = 7.2 Hz, 2H), 2.72 (q,  $J$  = 7.6 Hz, 2H), 1.26 (t,  $J$  = 7.6 Hz, 3H), 1.13 (t,  $J$  = 7.2 Hz, 3H); <sup>13</sup>C NMR (125 MHz, CDCl<sub>3</sub>)  $\delta$  196.4, 165.4, 150.3, 138.0, 134.8, 131.0, 130.4, 130.2, 129.8, 128.0, 127.6, 125.1, 61.2, 29.1, 15.3, 14.4; FT-IR (neat) 2965, 2829, 2070, 1718, 1665, 1255, 1111, 1065, 1010 cm<sup>-1</sup>; HRMS (ESI)  $m/z$  [M+Na]<sup>+</sup> calcd for C<sub>19</sub>H<sub>18</sub>N<sub>2</sub>NaO<sub>3</sub>: 345.1210, found: 345.1209.

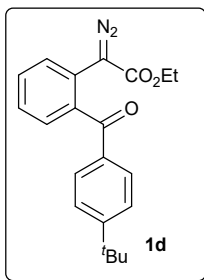

**Ethyl 2-(2-(4-*tert*-butyl)-benzoyl)-phenyl)-2-diazoacetate 1d.** Analytical

TLC on silica gel, 1:9 ethyl acetate/hexane  $R_f = 0.50$ ; yellow viscous liquid; yield 90% (240 mg);  $^1\text{H NMR}$  (400 MHz,  $\text{CDCl}_3$ )  $\delta$  7.73 (d,  $J = 8.4$  Hz, 2H), 7.57-7.52 (m, 2H), 7.51-7.49 (m, 1H), 7.44 (d,  $J = 8.8$  Hz, 2H), 7.40-7.36 (m, 1H), 4.11 (q,  $J = 7.2$  Hz, 2H), 1.34 (s, 9H), 1.12 (t,  $J = 7.2$  Hz, 3H);  $^{13}\text{C NMR}$  (150 MHz,  $\text{CDCl}_3$ )  $\delta$  196.5, 165.5, 157.0, 137.9, 134.5, 131.0, 130.3, 130.1, 129.9, 127.6, 125.4, 125.1, 122.5, 61.2, 35.3, 31.2, 14.4; FT-IR (neat) 2945, 2829, 2010, 1714, 1686, 1565, 1255, 1164, 1103  $\text{cm}^{-1}$ ; HRMS (ESI)  $m/z$   $[\text{M}+\text{Na}]^+$  calcd for  $\text{C}_{21}\text{H}_{22}\text{N}_2\text{NaO}_3$ : 373.1523, found: 373.1520.

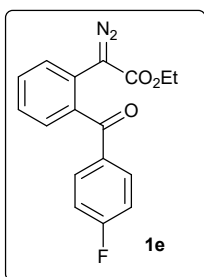

**Ethyl 2-diazo-2-(2-(4-fluorobenzoyl)-phenyl)-acetate 1e.**<sup>1a</sup> Yellow viscous

liquid;  $^1\text{H NMR}$  (400 MHz,  $\text{CDCl}_3$ )  $\delta$  7.86-7.82 (m, 2H), 7.58-7.54 (m, 1H), 7.50-7.47 (m, 2H), 7.41-7.37 (m, 1H), 7.12 (t,  $J = 8.4$  Hz, 2H), 4.11 (q,  $J = 7.2$  Hz, 2H), 1.14 (t,  $J = 7.2$  Hz, 3H).

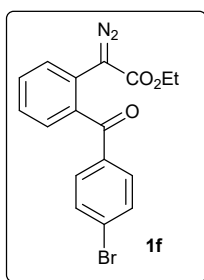

**Ethyl 2-(2-(4-bromo-benzoyl)-phenyl)-2-diazoacetate 1f.**<sup>1a</sup> Yellow viscous

liquid;  $^1\text{H NMR}$  (400 MHz,  $\text{CDCl}_3$ )  $\delta$  7.66 (d,  $J = 8.8$  Hz, 2H), 7.60-7.55 (m, 3H), 7.49-7.46 (m, 2H), 7.41-7.37 (m, 1H), 4.11 (q,  $J = 7.2$  Hz, 2H), 1.15 (t,  $J = 6.8$  Hz, 3H).

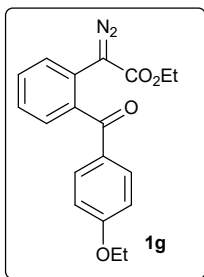

**Ethyl 2-diazo-2-(2-(4-ethoxy-benzoyl)-phenyl)acetate 1g.** Analytical TLC

on silica gel, 1:9 ethyl acetate/hexane  $R_f = 0.40$ ; yellow viscous liquid; yield 93% (260 mg);  $^1\text{H NMR}$  (400 MHz,  $\text{CDCl}_3$ )  $\delta$  7.77 (d,  $J = 8.8$  Hz, 2H), 7.56-7.51 (m, 2H), 7.49-7.47 (m, 1H), 7.40-7.36 (m, 1H), 6.89 (d,  $J = 8.8$  Hz, 2H), 4.13-4.07 (m, 4H), 1.44 (t,  $J = 6.8$  Hz, 3H), 1.14 (t,  $J = 7.2$  Hz, 3H);  $^{13}\text{C NMR}$  (125 MHz,  $\text{CDCl}_3$ )  $\delta$  195.4, 165.5, 163.3, 138.2, 132.5, 130.8, 130.0, 129.9, 129.7, 127.7, 124.9, 114.2, 63.9, 61.3, 14.8, 14.5; FT-IR (KBr) 2940, 2889, 2066, 1788, 1765, 1455, 1211, 1165  $\text{cm}^{-1}$ ; HRMS (ESI)  $m/z$   $[\text{M}+\text{Na}]^+$  calcd for  $\text{C}_{19}\text{H}_{18}\text{N}_2\text{NaO}_4$ : 361.1159, found: 361.1159.

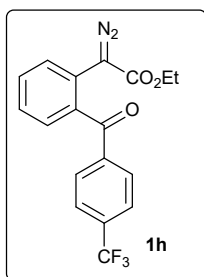

**Ethyl 2-diazo-2-(2-(4-(trifluoromethyl)-benzoyl)-phenyl)acetate 1h.**<sup>1a</sup>

Yellow viscous liquid;  $^1\text{H NMR}$  (400 MHz,  $\text{CDCl}_3$ )  $\delta$  7.91 (d,  $J = 8.0$  Hz, 2H), 7.71 (d,  $J = 8.0$  Hz, 2H), 7.59 (t,  $J = 7.6$  Hz, 1H), 7.48 (d,  $J = 8.0$  Hz, 2H), 7.42-7.39 (m, 1H), 4.10 (q,  $J = 7.2$  Hz, 2H), 1.14 (t,  $J = 7.2$  Hz, 3H).

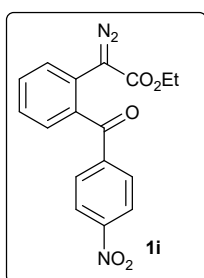

**Ethyl 2-diazo-2-(2-(4-nitro-benzoyl)-phenyl)acetate 1i.**<sup>1c</sup>

Yellow viscous liquid;  $^1\text{H NMR}$  (400 MHz,  $\text{CDCl}_3$ )  $\delta$  8.29 (d,  $J = 8.8$  Hz, 2H), 7.96 (d,  $J = 8.8$  Hz, 2H), 7.63-7.59 (m, 1H), 7.46 (d,  $J = 7.6$  Hz, 2H), 7.43-7.39 (m, 1H), 4.10 (q,  $J = 7.2$  Hz, 2H), 1.15 (t,  $J = 7.2$  Hz, 3H).

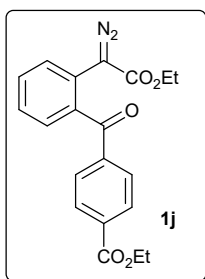

**Ethyl 4-(2-(1-diazo-2-ethoxy-2-oxoethyl)-benzoyl)-benzoate 1j.** Analytical

TLC on silica gel, 1:9 ethyl acetate/hexane  $R_f = 0.20$ ; yellow viscous liquid; yield 85% (240 mg);  $^1\text{H NMR}$  (400 MHz,  $\text{CDCl}_3$ )  $\delta$  8.10 (d,  $J = 8.4$  Hz, 2H), 7.83 (d,  $J = 8.4$  Hz, 2H), 7.60-7.56 (m, 1H), 7.51-7.47 (m, 2H), 7.42-7.38 (m, 1H), 4.42 (q,  $J = 7.2$  Hz, 2H), 4.08 (q,  $J = 7.2$  Hz, 2H), 1.41 (t,  $J = 7.2$  Hz, 3H), 1.12 (t,  $J = 7.2$  Hz, 3H);  $^{13}\text{C NMR}$  (125 MHz,  $\text{CDCl}_3$ )  $\delta$  196.0, 165.9, 165.3, 140.7, 137.1, 134.2, 131.6, 130.4, 129.9, 129.6, 129.4, 127.7, 125.4, 61.6, 61.4, 14.44, 14.40; FT-IR (neat) 2982, 2940, 2089, 1716, 1672, 1271, 1103, 1024  $\text{cm}^{-1}$ ; HRMS (ESI)  $m/z$   $[\text{M}+\text{Na}]^+$  calcd for  $\text{C}_{20}\text{H}_{18}\text{N}_2\text{NaO}_5$ : 389.1108, found: 389.1103.

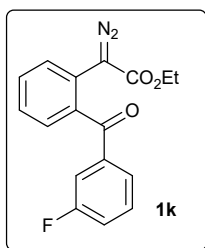

**Ethyl 2-diazo-2-(2-(3-fluorobenzoyl)phenyl)-acetate 1k.**<sup>1d</sup> Yellow

viscous liquid;  $^1\text{H NMR}$  (400 MHz,  $\text{CDCl}_3$ )  $\delta$  7.58-7.54 (m, 2H), 7.52-7.48 (m, 2H), 7.45-7.38 (m, 3H), 7.30-7.27 (m, 1H), 4.11 (q,  $J = 7.2$  Hz, 2H), 1.15 (t,  $J = 7.2$  Hz, 3H).

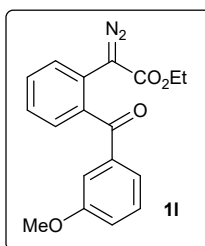

**Ethyl 2-diazo-2-(2-(3-methoxybenzoyl)phenyl)-acetate 1l.**<sup>1b</sup> Yellow

viscous liquid;  $^1\text{H NMR}$  (400 MHz,  $\text{CDCl}_3$ )  $\delta$  7.50-7.42 (m, 3H), 7.34-7.28 (m, 3H), 7.24-7.23 (m, 1H), 7.06-7.03 (m, 1H), 4.04 (q,  $J = 6.8$  Hz, 2H), 3.76 (s, 3H), 1.06 (t,  $J = 6.8$  Hz, 3H).

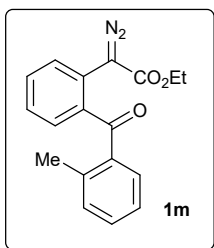

**Ethyl 2-diazo-2-(2-(2-methyl-benzoyl)-phenyl)-acetate 1m.**

Analytical TLC on silica gel, 1:9 ethyl acetate/hexane  $R_f = 0.40$ ; yellow viscous liquid; yield 78% (180 mg);  $^1\text{H NMR}$  (400 MHz,  $\text{CDCl}_3$ )  $\delta$  7.57-7.49 (m, 3H), 7.39-7.34 (m, 3H), 7.22-7.18 (m, 2H), 4.16 (q,  $J = 7.2$  Hz, 2H), 2.48 (s, 3H), 1.19 (t,  $J = 7.2$  Hz, 3H);  $^{13}\text{C NMR}$  (125 MHz,  $\text{CDCl}_3$ )  $\delta$  198.4, 165.5, 139.2, 138.4, 137.5, 131.71, 131.70, 131.6, 131.4, 130.9, 130.3, 128.0, 125.6, 125.4, 61.2, 20.8, 14.5; FT-IR (neat) 2983, 2925, 2088, 1696, 1664, 1294, 1177, 762  $\text{cm}^{-1}$ ; HRMS (ESI)  $m/z$   $[\text{M}+\text{Na}]^+$  calcd for  $\text{C}_{18}\text{H}_{16}\text{N}_2\text{NaO}_3$ : 331.1053, found: 331.1041.

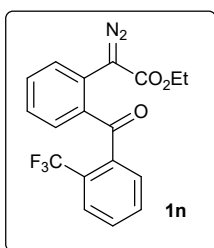

**Ethyl 2-diazo-2-(2-(2-(trifluoromethyl)-benzoyl)-phenyl)-acetate 1n.**

Analytical TLC on silica gel, 1:9 ethyl acetate/hexane  $R_f = 0.30$ ; yellow viscous liquid; yield 81% (210 mg);  $^1\text{H NMR}$  (400 MHz,  $\text{CDCl}_3$ )  $\delta$  7.80-7.77 (m, 1H), 7.62-7.57 (m, 4H), 7.56-7.52 (m, 1H), 7.39-7.37 (m, 1H), 7.33-7.29 (m, 1H), 4.25 (q,  $J = 7.2$  Hz, 2H), 1.27 (t,  $J = 6.8$  Hz, 3H);  $^{13}\text{C NMR}$  (125 MHz,  $\text{CDCl}_3$ )  $\delta$  195.5, 165.7, 138.8, 135.3, 133.0, 132.8, 131.6, 131.0, 130.5, 129.6, 128.8 ( $J_{\text{C-F}} = 32.1$  Hz), 127.6, 126.9 ( $J_{\text{C-F}} = 4.8$  Hz), 126.6, 124.8 ( $J_{\text{C-F}} = 272.2$  Hz), 61.3, 14.5; FT-IR (neat) 3063, 1978, 2088, 1679, 1309, 1294, 1162, 1032, 767  $\text{cm}^{-1}$ ; HRMS (ESI)  $m/z$   $[\text{M}+\text{Na}]^+$  calcd for  $\text{C}_{18}\text{H}_{13}\text{F}_3\text{N}_2\text{NaO}_3$ : 385.0770, found: 385.0767.

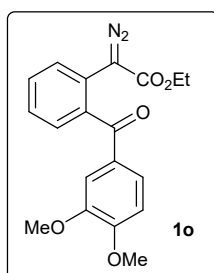

**Ethyl 2-diazo-2-(2-(3,4-dimethoxy-benzoyl)-phenyl)-acetate 1o.<sup>1a</sup>**

Yellow viscous liquid;  $^1\text{H NMR}$  (400 MHz,  $\text{CDCl}_3$ )  $\delta$  7.57-7.52 (m, 2H), 7.49-7.48 (m, 2H), 7.41-7.37 (m, 1H), 7.33-7.30 (m, 1H), 6.83 (d,  $J = 8.4$  Hz, 1H), 4.12 (q,  $J = 7.2$  Hz, 2H), 3.94 (s, 3H), 3.92 (s, 3H), 1.15 (t,  $J = 7.2$  Hz, 3H).

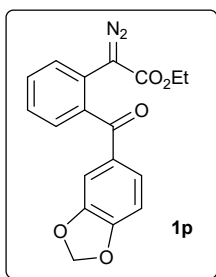

**Ethyl 2-(2-(benzo[*d*][1,3] dioxole-5-carbonyl)-phenyl)-2-diazoacetate**

**1p.**<sup>1b</sup> Yellow viscous liquid; <sup>1</sup>H NMR (400 MHz, CDCl<sub>3</sub>) δ 7.56-7.51 (m, 2H), 7.47-7.45 (m, 1H), 7.40-7.36 (m, 2H), 7.33-7.31 (m, 1H), 6.81 (d, *J* = 8.0 Hz, 1H), 6.05 (s, 2H), 4.12 (q, *J* = 7.2 Hz, 2H), 1.17 (t, *J* = 7.2 Hz, 3H).

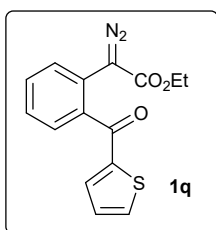

**Ethyl 2-diazo-2-(2-(thiophene-2-carbonyl)-phenyl)-acetate** **1q.**<sup>1a</sup> Yellow

solid; <sup>1</sup>H NMR (400 MHz, CDCl<sub>3</sub>) δ 7.72-7.70 (m, 1H), 7.60 (d, *J* = 7.2 Hz, 1H), 7.55-7.54 (m, 2H), 7.50-7.49 (m, 1H), 7.41-7.37 (m, 1H), 7.12-7.10 (m, 1H), 4.14 (q, *J* = 6.8 Hz, 2H), 1.15 (t, *J* = 6.8 Hz, 3H).

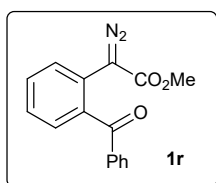

**Methyl 2-(2-(benzoyl-phenyl)-2-diazoacetate** **1r.**<sup>1b</sup> Yellow viscous liquid;

<sup>1</sup>H NMR (400 MHz, CDCl<sub>3</sub>) δ 7.79 (d, *J* = 7.2 Hz, 2H), 7.59-7.54 (m, 2H), 7.51-7.49 (m, 2H), 7.45 (t, *J* = 7.6 Hz, 2H), 7.41-7.37 (m, 1H), 3.59 (s, 3H).

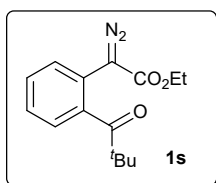

**Ethyl 2-diazo-2-(2-(pivaloylphenyl)acetate** **1s.**<sup>1a</sup> Yellow liquid; <sup>1</sup>H NMR

(400 MHz, CDCl<sub>3</sub>) δ 7.44-7.42 (m, 1H), 7.36-7.29 (m, 3H), 4.27 (q, *J* = 7.2 Hz, 2H), 1.29-1.23 (m, 12H).



### Characterization Data of the $\alpha$ -halo-hydroxamate:

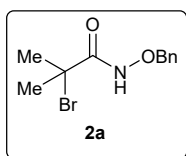

***N*-(benzyloxy)-2-bromo-2-methyl-propanamide 2a.**<sup>2a</sup> Colorless solid; <sup>1</sup>H NMR (400 MHz, CDCl<sub>3</sub>)  $\delta$  9.06 (bs, 1H), 7.43-7.38 (m, 5H), 4.94 (s, 2H), 1.93 (s, 6H).

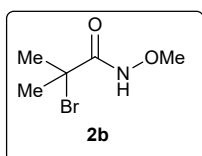

**2-Bromo-*N*-methoxy-2-methyl-propanamide 2b.**<sup>2b</sup> Colorless solid; <sup>1</sup>H NMR (400 MHz, CDCl<sub>3</sub>)  $\delta$  9.32 (bs, 1H), 3.79 (s, 3H), 1.96 (s, 6H).

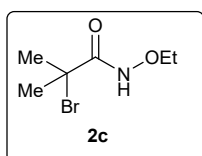

**2-Bromo-*N*-ethoxy-2-methyl-propanamide 2c.**<sup>2b</sup> Colorless solid; <sup>1</sup>H NMR (400 MHz, CDCl<sub>3</sub>)  $\delta$  9.24 (bs, 1H), 4.00 (q,  $J$  = 7.2 Hz, 2H), 1.96 (s, 6H), 1.29 (t,  $J$  = 6.8 Hz, 3H).

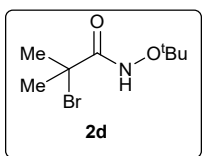

**2-Bromo-*N*-(*tert*-butoxy)-2-methyl-propanamide 2d.**<sup>2c</sup> Colorless solid; <sup>1</sup>H NMR (400 MHz, CDCl<sub>3</sub>)  $\delta$  8.81 (bs, 1H), 1.98 (s, 6H), 1.30 (s, 9H).

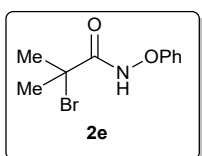

**2-Bromo-2-methyl-*N*-phenoxy-propanamide 2e.**<sup>2d</sup> Grey solid; <sup>1</sup>H NMR (400 MHz, CDCl<sub>3</sub>)  $\delta$  7.32 (t,  $J$  = 7.6 Hz, 2H), 7.09-7.05 (m, 3H), 2.05 (s, 6H).

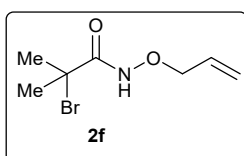

***N*-(Allyloxy)-2-bromo-2-methyl-propanamide 2f.**<sup>2c</sup> Yellow liquid; <sup>1</sup>H NMR (400 MHz, CDCl<sub>3</sub>)  $\delta$  9.19 (bs, 1H), 6.04-5.94 (m, 1H), 5.40-5.35 (m, 2H), 4.41 (d,  $J$  = 6.4 Hz, 2H), 1.95 (s, 6H).

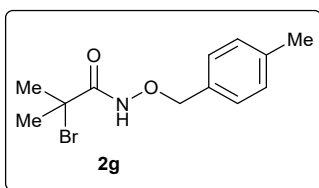

**2-Bromo-2-methyl-N-((4-methyl-benzyl) oxy)-propenamide**

**2g.**<sup>2b</sup> Colorless solid; <sup>1</sup>H NMR (400 MHz, CDCl<sub>3</sub>) δ 9.02 (bs, 1H), 7.30 (d, *J* = 8.0 Hz, 2H), 7.19 (d, *J* = 8.0 Hz, 2H), 4.89 (s, 2H), 2.37 (s, 3H), 1.93 (s, 6H).

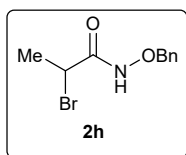

**N-(Benzyloxy)-2-bromo-propanamide 2h.**<sup>2a</sup> Brown solid; <sup>1</sup>H NMR (400

MHz, CDCl<sub>3</sub>) δ 8.92 (bs, 1H), 7.42-7.38 (m, 5H), 4.94 (s, 2H), 4.37-4.32 (m, 1H), 1.71 (d, *J* = 5.6 Hz, 3H).

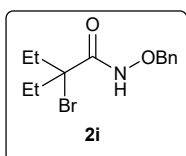

**N-(Benzyloxy)-2-bromo-2-ethylbutanamide 2i.** Analytical TLC on silica gel,

2:8 ethyl acetate/hexane *R<sub>f</sub>* = 0.30; yellow oil; yield 75% (150 mg); <sup>1</sup>H NMR (400 MHz, CDCl<sub>3</sub>) δ 9.20 (bs, 1H), 7.44-7.35 (m, 5H), 4.93 (s, 2H), 2.26-2.17 (m, 2H), 1.98-1.89 (m, 2H), 1.00 (t, *J* = 7.2 Hz, 6H); <sup>13</sup>C NMR (125 MHz, CDCl<sub>3</sub>) δ 167.7, 134.9, 129.5, 129.1, 128.8, 78.7, 76.3, 36.2, 10.4; FT-IR (neat) 3063, 1978, 2088, 1679, 1309, 1294, 1162, 1032, 767 cm<sup>-1</sup>; HRMS (ESI) *m/z* [M+H]<sup>+</sup> calcd for C<sub>13</sub>H<sub>19</sub>BrNO<sub>2</sub>: 300.0594, found: 300.0590.

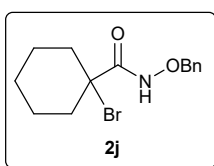

**N-(Benzyloxy)-1-bromocyclohexane-1-carboxamide 2j.**<sup>2b</sup> Brown solid;

<sup>1</sup>H NMR (400 MHz, CDCl<sub>3</sub>) δ 9.01 (bs, 1H), 7.44-7.36 (m, 5H), 4.94 (s, 2H), 2.16-2.09 (m, 2H), 2.02-1.97 (m, 2H), 1.77-1.63 (m, 5H), 1.36-1.27 (m, 1H).

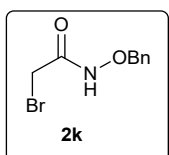

**N-(Benzyloxy)-2-bromo-acetamide 2k.**<sup>2a</sup> Colorless solid; <sup>1</sup>H NMR (500 MHz,

CDCl<sub>3</sub>) δ 8.68 (bs, 1H), 7.41 (s, 5H), 4.94 (s, 2H), 3.79 (s, 2H).

## Characterization Data of Products

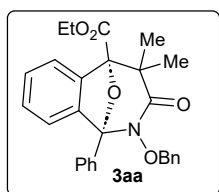

**Ethyl 2-(benzyloxy)-4,4-dimethyl-3-oxo-1-phenyl-1,2,3,4-tetrahydro-5H-1,5-epoxybenzo[c]azepine-5-carboxylate 3aa.** Analytical TLC on silica gel, 1:9 ethyl acetate/hexane  $R_f = 0.40$ ; colorless sticky solid; yield 86% (40 mg);  $^1\text{H NMR}$  (400 MHz,  $\text{CDCl}_3$ )  $\delta$  8.02-8.00 (m, 2H), 7.73-7.71 (m, 1H), 7.60-7.58 (m, 1H), 7.54-7.52 (m, 3H), 7.36-7.34 (m, 2H), 7.24-7.20 (m, 3H), 7.02-7.00 (m, 2H), 4.95 (d,  $J = 8.8$  Hz, 1H), 4.56 (d,  $J = 9.2$  Hz, 1H), 4.44-4.32 (m, 2H), 1.66 (s, 3H), 1.38 (t,  $J = 7.2$  Hz, 3H), 1.34 (s, 3H);  $^{13}\text{C NMR}$  (125 MHz,  $\text{CDCl}_3$ )  $\delta$  177.6, 167.4, 142.7, 139.0, 135.0, 134.3, 129.9, 129.4, 128.9, 128.6, 128.5, 128.4, 128.3, 124.8, 123.4, 98.6, 89.7, 78.1, 62.1, 52.5, 24.5, 19.9, 14.4; FT-IR (neat) 2927, 2837, 1731, 1703, 1458, 1304, 1048, 752, 699,  $\text{cm}^{-1}$ ; HRMS (ESI)  $m/z$   $[\text{M}+\text{H}]^+$  calcd for  $\text{C}_{28}\text{H}_{28}\text{NO}_5$ : 458.1962, found: 458.1968.

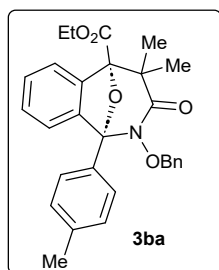

**Ethyl 2-(benzyloxy)-4,4-dimethyl-3-oxo-1-(*p*-tolyl)-1,2,3,4-tetrahydro-5H-1,5-epoxybenzo[c]azepine-5-carboxylate 3ba.** Analytical TLC on silica gel, 1:9 ethyl acetate/hexane  $R_f = 0.50$ ; colorless sticky liquid; yield 84% (40 mg);  $^1\text{H NMR}$  (400 MHz,  $\text{CDCl}_3$ )  $\delta$  7.86 (d,  $J = 8.4$  Hz, 2H), 7.72-7.70 (m, 1H), 7.58-7.56 (m, 1H), 7.34-7.30 (m, 4H), 7.25-7.18 (m, 3H), 7.05-7.03 (m, 2H), 4.94 (d,  $J = 9.2$  Hz, 1H), 4.58 (d,  $J = 9.2$  Hz, 1H), 4.44-4.27 (m, 2H), 2.43 (s, 3H), 1.65 (s, 3H), 1.36 (t,  $J = 7.2$  Hz, 3H), 1.33 (s, 3H);  $^{13}\text{C NMR}$  (125 MHz,  $\text{CDCl}_3$ )  $\delta$  177.5, 167.4, 142.9, 139.8, 139.1, 135.2, 131.4, 129.4, 129.2, 128.8, 128.4, 128.3, 128.2, 124.8, 123.3, 98.6, 89.6, 78.0, 62.0, 52.4, 24.5, 21.4, 19.9, 14.4; FT-IR (neat) 3030, 2985, 2936, 1737, 1704, 1460, 1214, 1048, 753,  $\text{cm}^{-1}$ ; HRMS (ESI)  $m/z$   $[\text{M}+\text{H}]^+$  calcd for  $\text{C}_{29}\text{H}_{30}\text{NO}_5$ : 472.2118, found: 472.2112.

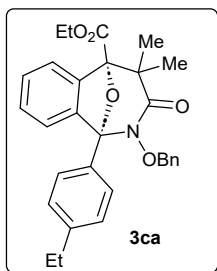

**Ethyl 2-(benzyloxy)-1-(4-ethylphenyl)-4,4-dimethyl-3-oxo-1,2,3,4-**

**tetrahydro-5H-1,5-epoxybenzo[c]azepine-5-carboxylate 3ca.** Analytical TLC on silica gel, 1:9 ethyl acetate/hexane  $R_f = 0.50$ ; colorless sticky solid; yield 81% (39 mg);  $^1\text{H}$  NMR (400 MHz,  $\text{CDCl}_3$ )  $\delta$  7.90 (d,  $J = 8.4$  Hz, 2H), 7.73-7.71 (m, 1H), 7.59-7.57 (m, 1H), 7.36-7.33 (m, 4H), 7.24-7.18 (m, 3H), 7.02-6.99 (m, 2H), 4.96 (d,  $J = 9.2$  Hz, 1H), 4.59 (d,  $J = 9.2$  Hz, 1H), 4.45-4.29 (m, 2H), 2.75 (q,  $J = 7.6$  Hz, 2H), 1.66 (s, 3H), 1.38 (t,  $J = 7.2$  Hz, 3H), 1.34 (s, 3H), 1.30 (t,  $J = 7.6$  Hz, 3H);  $^{13}\text{C}$  NMR (150 MHz,  $\text{CDCl}_3$ )  $\delta$  177.6, 167.4, 146.2, 142.8, 139.0, 135.2, 131.6, 129.4, 128.8, 128.5, 128.4, 128.3, 128.2, 128.0, 124.8, 123.4, 98.7, 89.6, 78.0, 62.0, 52.4, 28.9, 24.5, 19.9, 15.9, 14.4; FT-IR (neat) 2967, 2935, 2873, 1730, 1701, 1459, 1304, 1047, 752,  $\text{cm}^{-1}$ ; HRMS (ESI)  $m/z$   $[\text{M}+\text{H}]^+$  calcd for  $\text{C}_{30}\text{H}_{32}\text{NO}_5$ : 486.2275, found: 486.2277.

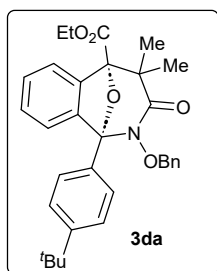

**Ethyl 2-(benzyloxy)-1-(4-(*tert*-butyl)phenyl)-4,4-dimethyl-3-oxo-1,2,3,4-**

**tetrahydro-5H-1,5-epoxybenzo[c]azepine-5-carboxylate 3da.** Analytical TLC on silica gel, 1:6.5 ethyl acetate/hexane  $R_f = 0.40$ ; colorless solid; mp 163-165 °C yield 73% (37 mg);  $^1\text{H}$  NMR (400 MHz,  $\text{CDCl}_3$ )  $\delta$  7.90 (d,  $J = 8.8$  Hz, 2H), 7.72-7.70 (m, 1H), 7.59-7.57 (m, 1H), 7.52 (d,  $J = 8.8$  Hz, 2H), 7.36-7.32 (m, 2H), 7.23-7.16 (m, 3H), 6.94-6.92 (m, 2H), 4.97 (d,  $J = 9.2$  Hz, 1H), 4.59 (d,  $J = 9.2$  Hz, 1H), 4.45-4.28 (m, 2H), 1.66 (s, 3H), 1.39-1.36 (m, 12H), 1.33 (s, 3H);  $^{13}\text{C}$  NMR (125 MHz,  $\text{CDCl}_3$ )  $\delta$  177.6, 167.4, 153.0, 142.8, 139.1, 135.2, 131.4, 129.4, 128.8, 128.4, 128.3, 128.2, 125.5, 124.8, 123.4, 98.8, 89.6, 78.1, 62.0, 52.5, 34.9, 31.5, 24.5, 19.9, 14.4; FT-IR (neat) 2986, 2935, 2883, 1730, 1700, 1459, 1212, 1047, 748,  $\text{cm}^{-1}$ ; HRMS (ESI)  $m/z$   $[\text{M}+\text{H}]^+$  calcd for  $\text{C}_{32}\text{H}_{36}\text{NO}_5$ : 514.2588, found: 514.2586.

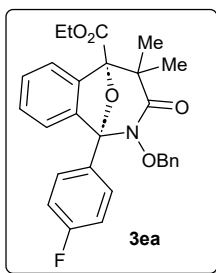

**Ethyl 2-(benzyloxy)-1-(4-fluorophenyl)-4,4-dimethyl-3-oxo-1,2,3,4-**

**tetrahydro-5H-1,5-epoxybenzo[c]azepine-5-carboxylate 3ea.** Analytical TLC on silica gel, 1:9 ethyl acetate/hexane  $R_f = 0.50$ ; colorless sticky solid; yield 77% (36 mg);  $^1\text{H}$  NMR (400 MHz,  $\text{CDCl}_3$ )  $\delta$  7.99-7.96 (m, 2H), 7.73-7.71 (m, 1H), 7.55-7.53 (m, 1H), 7.38-7.34 (m, 2H), 7.25-7.17 (m, 5H), 7.07-7.04 (m, 2H), 4.96 (d,  $J = 9.2$  Hz, 1H), 4.54 (d,  $J = 9.2$  Hz, 1H), 4.46-4.30 (m, 2H), 1.64 (s, 3H), 1.38 (t,  $J = 7.2$  Hz, 3H), 1.33 (s, 3H);  $^{13}\text{C}$  NMR (150 MHz,  $\text{CDCl}_3$ )  $\delta$  177.6, 167.2, 164.4 ( $J_{\text{C-F}} = 247.8$  Hz), 142.5, 139.0, 135.0, 130.5 ( $J_{\text{C-F}} = 8.4$  Hz), 130.4 ( $J_{\text{C-F}} = 3.3$  Hz), 129.8, 129.3, 129.0, 128.6, 128.4, 124.9, 123.2, 115.6 ( $J_{\text{C-F}} = 21.6$  Hz), 98.1, 89.7, 78.1, 62.2, 52.5, 24.5, 19.9, 14.4;  $^{19}\text{F}$  NMR (565 MHz,  $\text{CDCl}_3$ )  $\delta$  -111.39; FT-IR (neat) 3065, 2985, 2931, 1732, 1706, 1513, 1305, 1230, 1049, 753,  $\text{cm}^{-1}$ ; HRMS (ESI)  $m/z$   $[\text{M}+\text{H}]^+$  calcd for  $\text{C}_{28}\text{H}_{27}\text{FNO}_5$ : 476.1868, found: 476.1873.

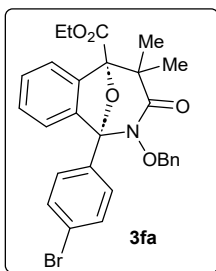

**Ethyl 2-(benzyloxy)-1-(4-bromophenyl)-4,4-dimethyl-3-oxo-1,2,3,4-**

**tetrahydro-5H-1,5-epoxybenzo[c]azepine-5-carboxylate 3fa.** Analytical TLC on silica gel, 1:6.5 ethyl acetate/hexane  $R_f = 0.40$ ; yellow sticky solid; yield 82% (43 mg);  $^1\text{H}$  NMR (400 MHz,  $\text{CDCl}_3$ )  $\delta$  7.87-7.84 (m, 2H), 7.72-7.69 (m, 1H), 7.65-7.62 (m, 2H), 7.53-7.50 (m, 1H), 7.37-7.31 (m, 2H), 7.26-7.21 (m, 3H), 7.07-7.05 (m, 2H), 4.96 (d,  $J = 9.2$  Hz, 1H), 4.55 (d,  $J = 9.2$  Hz, 1H), 4.43-4.31 (m, 2H), 1.64 (s, 3H), 1.37 (t,  $J = 7.2$  Hz, 3H), 1.33 (s, 3H);  $^{13}\text{C}$  NMR (150 MHz,  $\text{CDCl}_3$ )  $\delta$  177.5, 167.2, 142.2, 138.9, 134.9, 133.4, 131.7, 130.1, 129.3, 129.0, 128.6, 128.5, 128.4, 124.9, 124.2, 123.1, 98.1, 89.7, 78.1, 62.1, 52.6, 24.4, 19.8, 14.4; FT-IR (neat) 2965, 2915, 1742, 1716, 1532, 1345, 1210, 1029, 780,  $\text{cm}^{-1}$ ; HRMS (ESI)  $m/z$   $[\text{M}+\text{H}]^+$  calcd for  $\text{C}_{28}\text{H}_{27}\text{BrNO}_5$ : 536.1067, found: 536.1061.

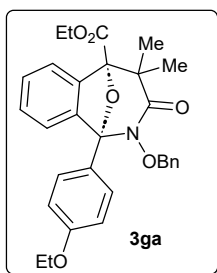

**Ethyl 2-(benzyloxy)-1-(4-ethoxyphenyl)-4,4-dimethyl-3-oxo-1,2,3,4-**

**tetrahydro-5H-1,5-epoxybenzo[c]azepine-5-carboxylate 3ga.** Analytical TLC on silica gel, 1:9 ethyl acetate/hexane  $R_f = 0.50$ ; colorless sticky liquid; yield 80% (40 mg);  $^1\text{H}$  NMR (400 MHz,  $\text{CDCl}_3$ )  $\delta$  7.89 (d,  $J = 8.8$  Hz, 2H), 7.72-7.69 (m, 1H), 7.58-7.56 (m, 1H), 7.34-7.32 (m, 2H), 7.25-7.21 (m, 3H), 7.08-7.05 (m, 2H), 7.00 (d,  $J = 8.8$  Hz, 2H), 4.94 (d,  $J = 8.8$  Hz, 1H), 4.57 (d,  $J = 9.2$  Hz, 1H), 4.45-4.29 (m, 2H), 4.12 (q,  $J = 7.2$  Hz, 2H), 1.64 (s, 3H), 1.46 (t,  $J = 6.8$  Hz, 3H), 1.38 (t,  $J = 7.2$  Hz, 3H), 1.32 (s, 3H);  $^{13}\text{C}$  NMR (125 MHz,  $\text{CDCl}_3$ )  $\delta$  177.5, 167.5, 160.1, 142.9, 139.0, 135.2, 129.9, 129.4, 128.8, 128.4, 128.34, 128.32, 126.4, 124.8, 123.3, 114.4, 98.6, 89.5, 78.0, 63.7, 62.0, 52.4, 24.5, 19.9, 14.9, 14.4; FT-IR (neat) 2982, 2933, 1731, 1702, 1304, 1249, 1047, 754,  $\text{cm}^{-1}$ ; HRMS (ESI)  $m/z$   $[\text{M}+\text{H}]^+$  calcd for  $\text{C}_{30}\text{H}_{32}\text{NO}_6$ : 502.2224, found: 502.2231.

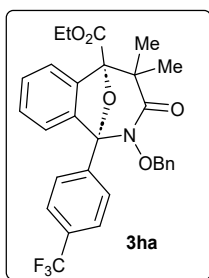

**Ethyl 2-(benzyloxy)-4,4-dimethyl-3-oxo-1-(4-(trifluoro-methyl)-phenyl)-**

**1,2,3,4-tetrahydro-5H-1,5-epoxybenzo[c]azepine-5-carboxylate 3ha.** Analytical TLC on silica gel, 1:6.5 ethyl acetate/hexane  $R_f = 0.50$ ; yellow sticky liquid; yield 76% (39 mg);  $^1\text{H}$  NMR (400 MHz,  $\text{CDCl}_3$ )  $\delta$  8.09 (d,  $J = 8.0$  Hz, 2H), 7.77-7.72 (m, 3H), 7.55-7.53 (m, 1H), 7.40-7.34 (m, 2H), 7.24-7.20 (m, 3H), 7.03-7.00 (m, 2H), 4.99 (d,  $J = 9.6$  Hz, 1H), 4.54 (d,  $J = 9.2$  Hz, 1H), 4.46-4.30 (m, 2H), 1.66 (s, 3H), 1.38 (t,  $J = 7.2$  Hz, 3H), 1.34 (s, 3H);  $^{13}\text{C}$  NMR (150 MHz,  $\text{CDCl}_3$ )  $\delta$  177.7, 167.1, 142.1, 139.0, 138.2, 134.8, 132.0 ( $J_{\text{C-F}} = 32.5$  Hz), 129.3, 129.1, 128.9, 128.8, 128.7, 128.4, 125.5 ( $J_{\text{C-F}} = 3.6$  Hz), 125.0, 124.9, 123.1, 97.8, 89.9, 78.2, 62.2, 52.7, 24.4, 19.9, 14.4;  $^{19}\text{F}$  NMR (565 MHz,  $\text{CDCl}_3$ )  $\delta$  -62.68.; FT-IR (neat) 2926, 2855, 1734, 1711, 1323, 1169, 1066, 753,  $\text{cm}^{-1}$ ; HRMS (ESI)  $m/z$   $[\text{M}+\text{H}]^+$  calcd for  $\text{C}_{29}\text{H}_{27}\text{NF}_3\text{O}_5$ : 526.1836, found: 526.1841.

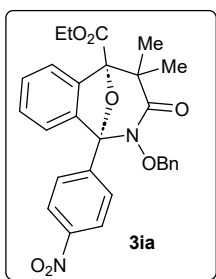

**Ethyl 2-(benzyloxy)-4,4-dimethyl-1-(4-nitrophenyl)-3-oxo-1,2,3,4-**

**tetrahydro-5H-1,5-epoxybenzo[c]azepine-5-carboxylate 3ia.** Analytical TLC on silica gel, 1:5 ethyl acetate/hexane  $R_f = 0.4$ ; yellow sticky solid; yield 64% (32 mg);  $^1\text{H}$  NMR (400 MHz,  $\text{CDCl}_3$ )  $\delta$  8.32 (d,  $J = 8.8$  Hz, 2H), 8.14 (d,  $J = 8.8$  Hz, 2H), 7.75-7.73 (m, 1H), 7.54-7.52 (m, 1H), 7.40-7.37 (m, 2H), 7.25-7.21 (m, 3H), 7.07-7.05 (m, 2H), 5.00 (d,  $J = 9.6$  Hz, 1H), 4.53 (d,  $J = 9.6$  Hz, 1H), 4.44-4.33 (m, 2H), 1.65 (s, 3H), 1.39 (t,  $J = 7.2$  Hz, 3H), 1.35 (s, 3H);  $^{13}\text{C}$  NMR (125 MHz,  $\text{CDCl}_3$ )  $\delta$  177.6, 166.9, 148.7, 141.8, 141.0, 138.9, 134.7, 129.5, 129.3, 129.2, 129.0, 128.7, 128.5, 125.1, 123.6, 122.9, 97.4, 90.0, 78.3, 62.3, 52.9, 24.4, 19.9, 14.4; FT-IR (neat) 3065, 2961, 2870, 1731, 1704, 1461, 1306, 1049, 755,  $\text{cm}^{-1}$ ; HRMS (ESI)  $m/z$   $[\text{M}+\text{H}]^+$  calcd for  $\text{C}_{28}\text{H}_{27}\text{N}_2\text{O}_7$ : 503.1813, found: 5023.1810.

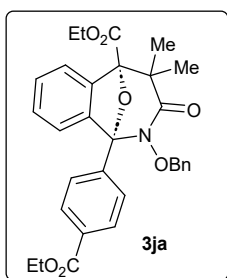

**Ethyl 2-(benzyloxy)-1-(4-(ethoxycarbonyl)phenyl)-4,4-dimethyl-3-**

**oxo-1,2,3,4-tetrahydro-5H-1,5-epoxybenzo[c]azepine-5-carboxylate 3ja.** Analytical TLC on silica gel, 1:9 ethyl acetate/hexane  $R_f = 0.45$ ; yellow sticky liquid; yield 77% (41 mg);  $^1\text{H}$  NMR (500 MHz,  $\text{CDCl}_3$ )  $\delta$  8.18 (d,  $J = 9.0$  Hz, 2H), 8.06 (d,  $J = 9.0$  Hz, 2H), 7.73-7.72 (m, 1H), 7.56-7.55 (m, 1H), 7.37-7.35 (m, 2H), 7.25-7.20 (m, 3H), 7.05-7.04 (m, 2H), 4.95 (d,  $J = 9.0$  Hz, 1H), 4.53 (d,  $J = 9.0$  Hz, 1H), 4.46-4.32 (m, 4H), 1.65 (s, 3H), 1.44 (t,  $J = 7.0$  Hz, 3H), 1.38 (t,  $J = 7.0$  Hz, 3H), 1.34 (s, 3H);  $^{13}\text{C}$  NMR (125 MHz,  $\text{CDCl}_3$ )  $\delta$  177.6, 167.2, 166.3, 142.3, 139.0, 138.9, 134.9, 131.8, 129.7, 129.4, 129.0, 128.7, 128.6, 128.5, 128.4, 124.9, 123.2, 98.0, 89.8, 78.1, 62.1, 61.4, 52.7, 24.5, 19.9, 14.5, 14.4. FT-IR (neat) 3005, 2951, 2850, 1732, 1715, 1431, 1356, 1055, 754, 715  $\text{cm}^{-1}$ ; HRMS (ESI)  $m/z$   $[\text{M}+\text{H}]^+$  calcd for  $\text{C}_{31}\text{H}_{32}\text{NO}_7$ : 530.2173, found: 530.2165.

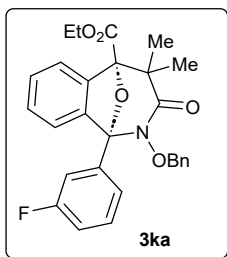

**Ethyl 2-(benzyloxy)-1-(3-fluorophenyl)-4,4-dimethyl-3-oxo-1,2,3,4-**

**tetrahydro-5H-1,5-epoxybenzo[c]azepine-5-carboxylate 3ka.** Analytical TLC on silica gel, 1:9 ethyl acetate/hexane  $R_f = 0.40$ ; colorless sticky liquid; yield 82% (39 mg);  $^1\text{H}$  NMR (400 MHz,  $\text{CDCl}_3$ )  $\delta$  7.80-7.77 (m, 1H), 7.73-7.69 (m, 2H), 7.56-7.54 (m, 1H), 7.52-7.46 (m, 1H), 7.38-7.33 (m, 2H), 7.25-7.18 (m, 4H), 7.08-7.05 (m, 2H), 4.98 (d,  $J = 9.2$  Hz, 1H), 4.56 (d,  $J = 9.2$  Hz, 1H), 4.46-4.30 (m, 2H), 1.65 (s, 3H), 1.38 (t,  $J = 7.2$  Hz, 3H), 1.33 (s, 3H);  $^{13}\text{C}$  NMR (125 MHz,  $\text{CDCl}_3$ )  $\delta$  177.6, 167.2, 163.8 ( $J_{\text{C-F}} = 244.7$  Hz), 142.2, 139.0, 136.9 ( $J_{\text{C-F}} = 7.3$  Hz), 134.9, 130.2 ( $J_{\text{C-F}} = 7.8$  Hz), 129.4, 129.0, 128.7, 128.6, 128.4, 124.9, 124.1 ( $J_{\text{C-F}} = 3.0$  Hz), 123.1, 116.9 ( $J_{\text{C-F}} = 20.8$  Hz), 115.9 ( $J_{\text{C-F}} = 23.2$  Hz), 97.8 ( $J_{\text{C-F}} = 2.2$  Hz), 89.8, 78.2, 62.1, 52.6, 24.4, 19.9, 14.4;  $^{19}\text{F}$  NMR (470 MHz,  $\text{CDCl}_3$ )  $\delta$  -111.95; FT-IR (neat) 2987, 2935, 1731, 1704, 1305, 1217, 1049, 750,  $\text{cm}^{-1}$ ; HRMS (ESI)  $m/z$   $[\text{M}+\text{H}]^+$  calcd for  $\text{C}_{28}\text{H}_{27}\text{FNO}_5$ : 476.1868, found: 476.1866.

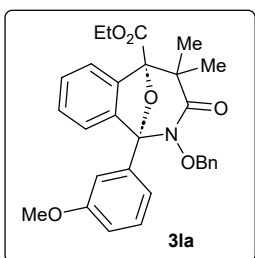

**Ethyl 2-(benzyloxy)-1-(3-methoxyphenyl)-4,4-dimethyl-3-oxo-**

**1,2,3,4-tetrahydro-5H-1,5-epoxybenzo[c]azepine-5-carboxylate 3la.** Analytical TLC on silica gel, 1:9 ethyl acetate/hexane  $R_f = 0.40$ ; colorless sticky solid; yield 78% (38 mg);  $^1\text{H}$  NMR (400 MHz,  $\text{CDCl}_3$ )  $\delta$  7.72-7.70 (m, 1H), 7.60-7.58 (m, 2H), 7.55-7.54 (m, 1H), 7.44 (t,  $J = 8.0$  Hz, 1H), 7.35-7.32 (m, 2H), 7.24-7.20 (m, 3H), 7.06-7.03 (m, 3H), 4.98 (d,  $J = 8.8$  Hz, 1H), 4.61 (d,  $J = 9.2$  Hz, 1H), 4.45-4.29 (m, 2H), 3.86 (s, 3H), 1.65 (s, 3H), 1.38 (t,  $J = 7.2$  Hz, 3H), 1.33 (s, 3H);  $^{13}\text{C}$  NMR (125 MHz,  $\text{CDCl}_3$ )  $\delta$  177.6, 167.4, 159.7, 142.6, 139.0, 135.8, 135.1, 129.6, 129.4, 128.9, 128.5, 128.3, 124.8, 123.3, 120.8, 115.1, 114.6, 98.5, 89.6, 78.1, 62.0, 55.5, 52.5, 24.5, 19.9, 14.4; FT-IR (neat) 3065, 2932, 1731, 1702, 1460, 1305, 1046, 751,  $\text{cm}^{-1}$ ; HRMS (ESI)  $m/z$   $[\text{M}+\text{H}]^+$  calcd for  $\text{C}_{29}\text{H}_{30}\text{NO}_6$ : 488.2068, found: 488.2064.



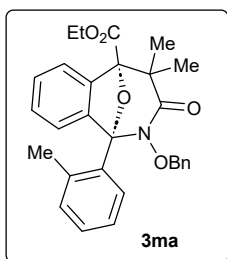

**Ethyl 2-(benzyloxy)-4,4-dimethyl-3-oxo-1-(*o*-tolyl)-1,2,3,4-tetrahydro-**

**5H-1,5-epoxybenzo[*c*]azepine-5-carboxylate 3ma.** Analytical TLC on silica gel, 1:9 ethyl acetate/hexane  $R_f = 0.50$ ; colorless sticky liquid; yield 75% (35 mg);  $^1\text{H NMR}$  (400 MHz,  $\text{CDCl}_3$ )  $\delta$  8.01 (d,  $J = 7.6$  Hz, 1H), 7.75-7.73 (m, 1H), 7.69-7.67 (m, 1H), 7.44-7.40 (m, 1H), 7.37-7.35 (m, 3H), 7.31-7.27 (m, 1H), 7.22-7.16 (m, 3H), 6.91-6.89 (m, 2H), 4.92 (d,  $J = 9.2$  Hz, 1H), 4.50 (d,  $J = 8.8$  Hz, 1H), 4.44-4.30 (m, 2H), 2.85 (s, 3H), 1.66 (s, 3H), 1.37 (t,  $J = 7.2$  Hz, 3H), 1.30 (s, 3H);  $^{13}\text{C NMR}$  (125 MHz,  $\text{CDCl}_3$ )  $\delta$  177.0, 167.4, 143.1, 139.5, 138.3, 135.1, 133.1, 132.0, 130.0, 129.4, 129.3, 128.8, 128.4, 128.3, 128.2, 125.5, 124.8, 124.5, 99.8, 89.4, 77.4, 62.0, 52.6, 23.7, 21.9, 20.0, 14.4; FT-IR (neat) 2986, 2935, 1731, 1699, 1459, 1302, 1079, 1047, 752,  $\text{cm}^{-1}$ ; HRMS (ESI)  $m/z$   $[\text{M}+\text{H}]^+$  calcd for  $\text{C}_{29}\text{H}_{30}\text{NO}_5$ : 472.2118, found: 472.2120.

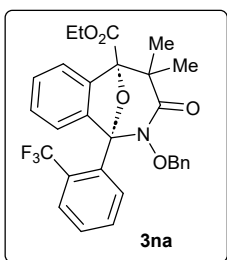

**Ethyl 2-(benzyloxy)-4,4-dimethyl-3-oxo-1-(2-(trifluoromethyl)-**

**phenyl)-1,2,3,4-tetrahydro-5H-1,5-epoxybenzo[*c*]azepine-5-carboxylate 3na.** Analytical TLC on silica gel, 1:9 ethyl acetate/hexane  $R_f = 0.50$ ; colorless sticky liquid; yield 66% (34 mg);  $^1\text{H NMR}$  (400 MHz,  $\text{CDCl}_3$ )  $\delta$  8.43-8.41 (m, 1H), 7.98-7.96 (m, 1H), 7.75-7.73 (m, 1H), 7.68-7.64 (m, 3H), 7.36-7.34 (m, 2H), 7.23-7.18 (m, 3H), 6.99-6.96 (m, 2H), 4.94 (d,  $J = 9.6$  Hz, 1H), 4.45-4.26 (m, 3H), 1.64 (s, 3H), 1.37 (t,  $J = 7.2$  Hz, 3H), 1.29 (s, 3H);  $^{13}\text{C NMR}$  (125 MHz,  $\text{CDCl}_3$ )  $\delta$  176.4, 167.2, 143.6, 138.1, 135.1, 131.4, 131.2, 130.5 ( $J_{\text{C-F}} = 32.5$  Hz), 130.1, 129.4 ( $J_{\text{C-F}} = 6.7$  Hz), 129.2, 128.8, 128.7 ( $J_{\text{C-F}} = 66.6$  Hz), 128.5, 128.4, 128.3, 125.1 ( $J_{\text{C-F}} = 272.9$  Hz), 124.8, 123.9, 98.1, 89.8, 77.8, 62.0, 52.7, 23.6, 20.3, 14.2;  $^{19}\text{F NMR}$  (470 MHz,  $\text{CDCl}_3$ )  $\delta$  -54.16; FT-IR (neat) 2988, 2933, 1733, 1699, 1460, 1302, 1158, 1043, 752,  $\text{cm}^{-1}$ ; HRMS (ESI)  $m/z$   $[\text{M}+\text{H}]^+$  calcd for  $\text{C}_{29}\text{H}_{27}\text{NF}_3\text{O}_5$ : 526.1836, found: 526.1840.

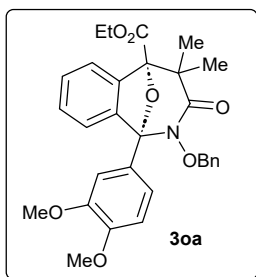

**Ethyl 2-(benzyloxy)-1-(3,4-dimethoxyphenyl)-4,4-dimethyl-3-oxo -**

**1,2,3,4-tetrahydro-5H-1,5-epoxybenzo[c]azepine-5-carboxylate 3oa.** Analytical TLC on silica gel, 1:6.5 ethyl acetate/hexane  $R_f = 0.50$ ; colorless sticky liquid; yield 63% (32 mg);  $^1\text{H}$  NMR (400 MHz,  $\text{CDCl}_3$ )  $\delta$  7.73-7.70 (m, 1H), 7.57-7.52 (m, 2H), 7.48 (d,  $J = 2.0$  Hz, 1H), 7.37-7.32 (m, 3H), 7.24-7.21 (m, 2H), 7.08-7.05 (m, 2H), 6.97 (d,  $J = 8.4$  Hz, 1H), 4.99 (d,  $J = 9.2$  Hz, 1H), 4.63 (d,  $J = 9.2$  Hz, 1H), 4.45-4.29 (m, 2H), 3.95 (s, 3H), 3.91 (s, 3H), 1.65 (s, 3H), 1.38 (t,  $J = 6.8$  Hz, 3H), 1.33 (s, 3H);  $^{13}\text{C}$  NMR (150 MHz,  $\text{CDCl}_3$ )  $\delta$  177.6, 167.4, 150.2, 148.9, 142.9, 139.0, 135.2, 129.2, 128.9, 128.5, 128.4, 128.3, 127.4, 124.9, 123.2, 121.4, 111.6, 110.8, 98.7, 89.6, 78.0, 62.1, 56.2, 56.1, 52.4, 24.5, 19.9, 14.4; FT-IR (neat) 2931, 2850, 1732, 1703, 1517, 1461, 1271, 1231, 1024, 755,  $\text{cm}^{-1}$ ; HRMS (ESI)  $m/z$   $[\text{M}+\text{H}]^+$  calcd for  $\text{C}_{30}\text{H}_{32}\text{NO}_7$ : 518.2173, found: 518.2182.

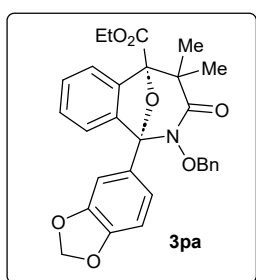

**Ethyl 1-(benzo[d][1,3]dioxol-5-yl)-2-(benzyloxy)-4,4-dimethyl-3-oxo-**

**1,2,3,4-tetrahydro-5H-1,5-epoxybenzo[c]azepine-5-carboxylate 3pa.** Analytical TLC on silica gel, 1:9 ethyl acetate/hexane  $R_f = 0.60$ ; yellow sticky solid; yield 80% (40 mg);  $^1\text{H}$  NMR (400 MHz,  $\text{CDCl}_3$ )  $\delta$  7.71-7.69 (m, 1H), 7.56-7.54 (m, 1H), 7.48-7.45 (m, 2H), 7.34-7.32 (m, 2H), 7.25-7.23 (m, 3H), 7.11-7.09 (m, 2H), 6.90 (d,  $J = 8.0$  Hz, 1H), 6.03-6.02 (m, 2H), 4.97 (d,  $J = 9.2$  Hz, 1H), 4.64 (d,  $J = 9.2$  Hz, 1H), 4.43-4.30 (m, 2H), 1.63 (s, 3H), 1.37 (t,  $J = 7.2$  Hz, 3H), 1.32 (s, 3H);  $^{13}\text{C}$  NMR (150 MHz,  $\text{CDCl}_3$ )  $\delta$  177.7, 167.3, 148.8, 147.9, 142.5, 139.0, 135.2, 129.5, 129.3, 128.9, 128.4, 128.3, 128.2, 124.8, 123.3, 122.5, 109.1, 108.1, 101.6, 98.6, 89.5, 78.0, 62.1, 52.4, 24.4, 19.8, 14.4; FT-IR (neat) 1986, 1958, 1731, 1701, 1442, 1232, 1041, 753,  $\text{cm}^{-1}$ ; HRMS (ESI)  $m/z$   $[\text{M}+\text{H}]^+$  calcd for  $\text{C}_{29}\text{H}_{28}\text{NO}_7$ : 502.1860, found: 502.1852.

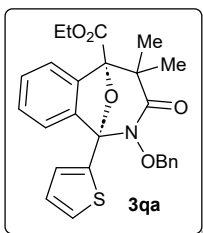

**Ethyl 2-(benzyloxy)-4,4-dimethyl-3-oxo-1-(thiophen-2-yl)-1,2,3,4-tetrahydro-5H-1,5-epoxybenzo[c]azepine-5-carboxylate 3qa.** Analytical TLC on silica gel, 1:9 ethyl acetate/hexane  $R_f = 0.60$ ; yellow sticky solid; yield 81% (38 mg);  $^1\text{H}$  NMR (400 MHz,  $\text{CDCl}_3$ )  $\delta$  7.70-7.68 (m, 1H), 7.63-7.60 (m, 2H), 7.51-7.50 (m, 1H), 7.34-7.32 (m, 2H), 7.26-7.24 (m, 3H), 7.16-7.11 (m, 3H), 4.99 (d,  $J = 9.2$  Hz, 1H), 4.70 (d,  $J = 9.2$  Hz, 1H), 4.45-4.29 (m, 2H), 1.64 (s, 3H), 1.38 (t,  $J = 7.2$  Hz, 3H), 1.32 (s, 3H);  $^{13}\text{C}$  NMR (150 MHz,  $\text{CDCl}_3$ )  $\delta$  177.2, 167.1, 142.9, 138.4, 137.2, 135.1, 129.4, 129.0, 128.7, 128.6, 128.5, 128.3, 127.6, 127.0, 124.7, 122.6, 96.4, 89.9, 78.4, 62.1, 52.6, 24.4, 19.8, 14.4; FT-IR (neat) 2986, 2940, 1730, 1704, 1294, 1044, 750,  $\text{cm}^{-1}$ ; HRMS (ESI)  $m/z$   $[\text{M}+\text{H}]^+$  calcd for  $\text{C}_{26}\text{H}_{26}\text{NO}_5\text{S}$ : 464.1526, found: 464.1523.

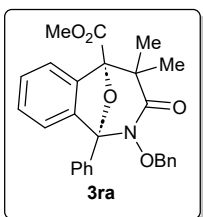

**Methyl 2-(benzyloxy)-4,4-dimethyl-3-oxo-1-phenyl-1,2,3,4-tetrahydro-5H-1,5-epoxybenzo[c]azepine-5-carboxylate 3ra.** Analytical TLC on silica gel, 1:9 ethyl acetate/hexane  $R_f = 0.40$ ; colorless solid; mp 148-149 °C yield 83% (37 mg);  $^1\text{H}$  NMR (400 MHz,  $\text{CDCl}_3$ )  $\delta$  8.02-8.00 (m, 2H), 7.74-7.72 (m, 1H), 7.60-7.58 (m, 1H), 7.54-7.52 (m, 3H), 7.36-7.34 (m, 2H), 7.23-7.19 (m, 3H), 7.02-7.00 (m, 2H), 4.98 (d,  $J = 9.2$  Hz, 1H), 4.58 (d,  $J = 9.2$  Hz, 1H), 3.87 (s, 3H), 1.66 (s, 3H), 1.34 (s, 3H);  $^{13}\text{C}$  NMR (125 MHz,  $\text{CDCl}_3$ )  $\delta$  177.6, 168.0, 142.4, 139.0, 135.1, 134.3, 129.9, 129.3, 128.9, 128.6, 128.5, 128.4, 128.3, 124.8, 123.4, 98.8, 89.8, 78.0, 52.7, 52.5, 24.5, 19.7; FT-IR (neat) 3030, 2951, 1737, 1701, 1304, 1050, 751,  $\text{cm}^{-1}$ ; HRMS (ESI)  $m/z$   $[\text{M}+\text{H}]^+$  calcd for  $\text{C}_{27}\text{H}_{26}\text{NO}_5$ : 444.1805, found: 444.1809.

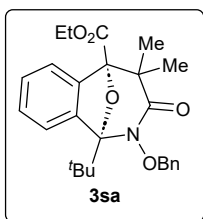

**Ethyl 2-(benzyloxy)-1-(tert-butyl)-4,4-dimethyl-3-oxo-1,2,3,4-tetrahydro-5H-1,5-epoxybenzo[c]azepine-5-carboxylate 3sa.** Analytical TLC on silica gel, 1:9 ethyl acetate/hexane  $R_f = 0.70$ ; colorless liquid; yield 74% (33 mg);  $^1\text{H}$  NMR (500 MHz,  $\text{CDCl}_3$ )  $\delta$

7.63-7.60 (m, 2H), 7.45-7.43 (m, 2H), 7.35-7.30 (m, 3H), 7.29-7.26 (m, 2H), 5.05 (d,  $J = 9.0$  Hz, 1H), 4.96 (d,  $J = 9.5$  Hz, 1H), 4.36-4.32 (m, 2H), 1.52 (s, 3H), 1.39-1.35 (m, 12H), 1.29 (s, 3H);  $^{13}\text{C}$  NMR (125 MHz,  $\text{CDCl}_3$ )  $\delta$  176.9, 167.9, 144.1, 139.3, 135.3, 129.4, 128.7, 128.54, 128.53, 128.0, 124.6, 122.3, 102.8, 88.2, 76.5, 61.7, 52.4, 37.8, 26.9, 24.2, 20.0, 14.4; FT-IR (neat) 3025, 2981, 1767, 1731, 1324, 1150, 791,  $\text{cm}^{-1}$ ; HRMS (ESI)  $m/z$   $[\text{M}+\text{H}]^+$  calcd for  $\text{C}_{26}\text{H}_{32}\text{NO}_5$ : 438.2275, found: 438.2270.

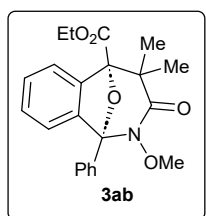

**Ethyl 2-methoxy-4,4-dimethyl-3-oxo-1-phenyl-1,2,3,4-tetrahydro-5H-**

**1,5-epoxybenzo[c]azepine-5-carboxylate 3ab.** Analytical TLC on silica gel, 1:9 ethyl acetate/hexane  $R_f = 0.50$ ; yellow sticky liquid; yield 82% (31 mg);  $^1\text{H}$  NMR (400 MHz,  $\text{CDCl}_3$ )  $\delta$  7.92-7.90 (m, 2H), 7.74-7.72 (m, 1H), 7.61-7.59 (m, 1H), 7.50-7.48 (m, 3H), 7.40-7.37 (m, 2H), 4.44-4.28 (m, 2H), 3.63 (s, 3H), 1.62 (s, 3H), 1.36 (t,  $J = 7.2$  Hz, 3H), 1.32 (s, 3H);  $^{13}\text{C}$  NMR (125 MHz,  $\text{CDCl}_3$ )  $\delta$  177.9, 167.3, 142.6, 139.1, 134.3, 129.8, 128.8, 128.5, 128.4, 128.3, 124.9, 123.2, 98.9, 89.6, 63.7, 62.0, 52.4, 24.3, 19.8, 14.4; FT-IR (neat) 2986, 2937, 1730, 1701, 1459, 1302, 1211, 1046, 753, 701,  $\text{cm}^{-1}$ ; HRMS (ESI)  $m/z$   $[\text{M}+\text{H}]^+$  calcd for  $\text{C}_{22}\text{H}_{24}\text{NO}_5$ : 382.1649, found: 382.1656.

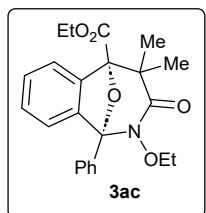

**Ethyl 2-ethoxy-4,4-dimethyl-3-oxo-1-phenyl-1,2,3,4-tetrahydro-5H-1,5-**

**epoxybenzo[c]azepine-5-carboxylate 3ac.** Analytical TLC on silica gel, 1:6.5 ethyl acetate/hexane  $R_f = 0.40$ ; yellow sticky solid; yield 75% (29 mg);  $^1\text{H}$  NMR (400 MHz,  $\text{CDCl}_3$ )  $\delta$  7.96-7.93 (m, 2H), 7.73-7.71 (m, 1H), 7.65-7.63 (m, 1H), 7.51-7.47 (m, 3H), 7.41-7.34 (m, 2H), 4.44-4.28 (m, 2H), 4.02-3.94 (m, 1H), 3.66-3.58 (m, 1H), 1.61 (s, 3H), 1.37 (t,  $J = 7.2$  Hz, 3H), 1.32 (s, 3H), 0.98 (t,  $J = 7.2$  Hz, 3H);  $^{13}\text{C}$  NMR (125 MHz,  $\text{CDCl}_3$ )  $\delta$  177.3, 167.4, 143.0, 139.0, 134.4, 129.7, 128.8, 128.4, 128.2, 124.8, 123.1, 98.4, 89.6, 71.9, 62.0, 52.3, 24.4, 19.9, 14.4, 13.4; FT-IR (neat) 2983, 2935, 1730, 1700, 1460, 1213, 1045, 752,  $\text{cm}^{-1}$ ; HRMS (ESI)  $m/z$   $[\text{M}+\text{H}]^+$  calcd for  $\text{C}_{23}\text{H}_{26}\text{NO}_5$ : 396.1805, found: 396.1804.

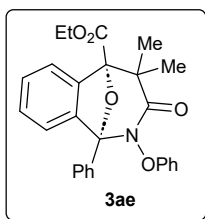

**Ethyl 4,4-dimethyl-3-oxo-2-phenoxy-1-phenyl-1,2,3,4-tetrahydro-5H-**

**1,5-epoxybenzo[c]azepine-5-carboxylate 3ae.** Analytical TLC on silica gel, 1:9 ethyl acetate/hexane  $R_f = 0.40$ ; colorless sticky liquid; yield 81% (36 mg);  $^1\text{H}$  NMR (400 MHz,  $\text{CDCl}_3$ )  $\delta$  7.80-7.78 (m, 1H), 7.68-7.65 (m, 3H), 7.50-7.42 (m, 2H), 7.34-7.29 (m, 1H), 7.27-7.23 (m, 2H), 7.21-7.17 (m, 2H), 6.97-6.93 (m, 1H), 6.84-6.82 (m, 2H), 4.47-4.31 (m, 2H), 1.74 (s, 3H), 1.41-1.37 (m, 6H);  $^{13}\text{C}$  NMR (125 MHz,  $\text{CDCl}_3$ )  $\delta$  178.2, 167.1, 159.3, 142.7, 139.2, 133.3, 129.8, 129.2, 129.1, 128.8, 128.4, 128.3, 124.8, 123.7, 122.5, 114.0, 100.5, 89.9, 62.2, 53.4, 24.3, 19.8, 14.4; FT-IR (neat) 2987, 2935, 1788, 1722, 1303, 1213, 1049, 752,  $\text{cm}^{-1}$ ; HRMS (ESI)  $m/z$   $[\text{M}+\text{H}]^+$  calcd for  $\text{C}_{27}\text{H}_{26}\text{NO}_5$ : 444.1805, found: 444.1809.

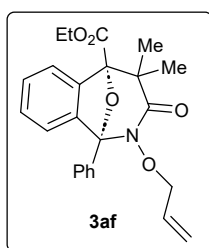

**Ethyl 2-(allyloxy)-4,4-dimethyl-3-oxo-1-phenyl-1,2,3,4-tetrahydro-5H-**

**1,5-epoxybenzo[c]azepine-5-carboxylate 3af.** Analytical TLC on silica gel, 1:6.5 ethyl acetate/hexane  $R_f = 0.30$ ; colorless sticky liquid; yield 68% (28 mg);  $^1\text{H}$  NMR (400 MHz,  $\text{CDCl}_3$ )  $\delta$  7.95-7.93 (m, 2H), 7.73-7.71 (m, 1H), 7.65-7.63 (m, 1H), 7.50-7.48 (m, 3H), 7.40-7.36 (m, 2H), 5.74-5.64 (m, 1H), 5.10-5.09 (m, 1H), 5.07-5.05 (m, 1H), 4.42-4.30 (m, 3H), 4.12-4.08 (m, 1H), 1.61 (s, 3H), 1.37 (t,  $J = 7.2$  Hz, 3H), 1.31 (s, 3H);  $^{13}\text{C}$  NMR (100 MHz,  $\text{CDCl}_3$ )  $\delta$  177.6, 167.4, 142.8, 139.0, 134.3, 132.1, 131.4, 129.8, 128.9, 128.5, 128.3, 124.9, 123.2, 119.6, 98.6, 89.6, 77.4, 62.1, 52.5, 24.4, 19.9, 14.4; FT-IR (neat) 2988, 2927, 2855, 1732, 1705, 1463, 1304, 1049, 760, 703,  $\text{cm}^{-1}$ ; HRMS (ESI)  $m/z$   $[\text{M}+\text{H}]^+$  calcd for  $\text{C}_{24}\text{H}_{26}\text{NO}_5$ : 408.1805, found: 408.1809.

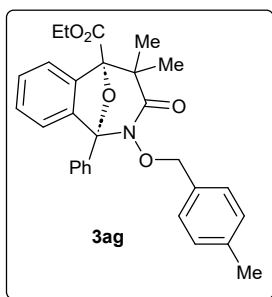

**Ethyl 4,4-dimethyl-2-((4-methylbenzyl)oxy)-3-oxo-1-phenyl-1,2,3,4-**

**tetrahydro-5H-1,5-epoxybenzo[c]azepine-5-carboxylate 3ag.** Analytical TLC on silica gel, 1:9 ethyl acetate/hexane  $R_f = 0.50$ ; colorless sticky solid; yield 78% (36 mg);  $^1\text{H NMR}$  (400 MHz,  $\text{CDCl}_3$ )  $\delta$  8.02-7.99 (m, 2H), 7.72-7.70 (m, 1H), 7.59-7.57 (m, 1H), 7.53-7.51 (m, 3H), 7.34-7.32 (m, 2H), 7.01 (d,  $J = 8.0$  Hz, 2H), 6.89 (d,  $J = 8.0$  Hz, 2H), 4.91 (d,  $J = 9.2$  Hz, 1H), 4.50 (d,  $J = 8.8$  Hz, 1H), 4.42-4.31 (m, 2H), 2.28 (s, 3H), 1.65 (s, 3H), 1.38 (t,  $J = 7.2$  Hz, 3H), 1.33 (s, 3H);  $^{13}\text{C NMR}$  (125 MHz,  $\text{CDCl}_3$ )  $\delta$  177.4, 167.4, 142.8, 139.1, 138.3, 134.4, 132.1, 129.8, 129.5, 129.0, 128.8, 128.5, 128.47, 128.40, 124.8, 123.4, 98.5, 89.7, 77.9, 62.0, 52.5, 24.5, 21.4, 19.9, 14.4; FT-IR (neat) 2985, 2928, 1731, 1704, 1462, 1304, 1049, 758, 702,  $\text{cm}^{-1}$ ; HRMS (ESI)  $m/z$   $[\text{M}+\text{H}]^+$  calcd for  $\text{C}_{29}\text{H}_{30}\text{NO}_5$ : 472.2118, found: 472.2116.

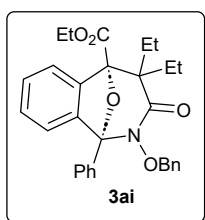

**Ethyl-2-(benzyloxy)-4,4-diethyl-3-oxo-1-phenyl-1,2,3,4-tetrahydro-5H-**

**1,5-epoxybenzo[c]azepine-5-carboxylate 3ai.** Analytical TLC on silica gel, 1:9 ethyl acetate/hexane  $R_f = 0.70$ ; colorless liquid; yield 70% (34 mg);  $^1\text{H NMR}$  (500 MHz,  $\text{CDCl}_3$ )  $\delta$  7.99-7.97 (m, 2H), 7.79-7.77 (m, 1H), 7.59-7.57 (m, 1H), 7.52-7.50 (m, 3H), 7.34-7.33 (m, 2H), 7.23-7.19 (m, 3H), 7.00 (d,  $J = 6.5$  Hz, 2H), 4.95 (d,  $J = 9.5$  Hz, 1H), 4.55 (d,  $J = 9.0$  Hz, 1H), 4.44-4.37 (m, 1H), 4.28-4.22 (m, 1H), 2.32-2.25 (m, 1H), 2.12-2.05 (m, 1H), 1.87 (q,  $J = 7.5$  Hz, 2H), 1.37 (t,  $J = 7.5$  Hz, 3H), 1.15 (t,  $J = 7.5$  Hz, 3H), 0.99 (t,  $J = 7.5$  Hz, 3H);  $^{13}\text{C NMR}$  (125 MHz,  $\text{CDCl}_3$ )  $\delta$  176.2, 167.9, 143.2, 139.8, 135.2, 134.6, 129.3, 128.6, 128.5, 128.45, 128.41, 128.34, 128.30, 128.2, 125.6, 123.3, 98.4, 89.9, 77.9, 62.1, 59.2, 27.1, 24.1, 14.3, 10.8, 9.5; FT-IR (neat) 2943, 2935, 1770, 1710, 1450, 1203, 1015, 782,  $\text{cm}^{-1}$ ; HRMS (ESI)  $m/z$   $[\text{M}+\text{H}]^+$  calcd for  $\text{C}_{30}\text{H}_{32}\text{NO}_5$ : 486.2275, found: 486.2268.

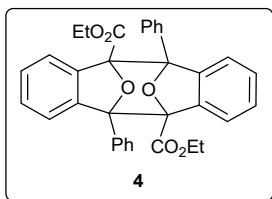

**Diethyl 6,12-diphenyl-5,12:6,11-diepoxy-dibenzo-[a,e][8]-annulene-5,11(6H,12H)-dicarboxylate 4.** Analytical TLC on silica gel, 1:9 ethyl acetate/hexane  $R_f = 0.30$ ; colorless liquid; yield 58% (30 mg);  $^1\text{H NMR}$  (500 MHz,  $\text{CDCl}_3$ )  $\delta$  7.85 (d,  $J = 7.5$  Hz, 6H), 7.70-7.67 (m, 2H), 7.65-7.60 (m, 6H), 7.50 (t,  $J = 7.5$  Hz, 4H), 4.19 (q,  $J = 7.0$  Hz, 4H), 1.22 (t,  $J = 7.0$  Hz, 6H);  $^{13}\text{C NMR}$  (125 MHz,  $\text{CDCl}_3$ )  $\delta$  196.6, , 186.9, 161.6, 140.1, 136.9, 136.8, 133.4, 131.91, 131.88, 130.9, 130.3, 130.2, 128.7, 62.7, 14.0; FT-IR (neat) 2984, 2928, 1708, 1649, 1284, 1201, 1020, 752,  $\text{cm}^{-1}$ ; HRMS (ESI)  $m/z$   $[\text{M}+\text{Na}]^+$  calcd for  $\text{C}_{34}\text{H}_{28}\text{NaO}_6$ : 550.1778, found: 550.1785.

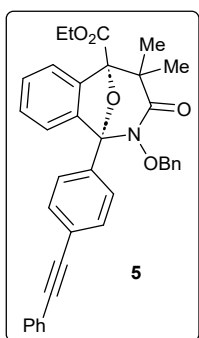

**Ethyl 2-(benzyloxy)-4,4-dimethyl-3-oxo-1-(4-(phenylethynyl)-phenyl)-1,2,3,4-tetrahydro-5H-1,5-epoxybenzo[c]azepine-5-carboxylate 5.** Analytical TLC on silica gel, 1:6.5 ethyl acetate/hexane  $R_f = 0.30$ ; yellow sticky liquid; yield 85% (48 mg);  $^1\text{H NMR}$  (400 MHz,  $\text{CDCl}_3$ )  $\delta$  7.98 (d,  $J = 8.4$  Hz, 2H), 7.74-7.71 (m, 1H), 7.67 (d,  $J = 8.4$  Hz, 2H), 7.59-7.56 (m, 3H), 7.38-7.35 (m, 5H), 7.26-7.24 (m, 3H), 7.09-7.07 (m, 2H), 4.96 (d,  $J = 9.2$  Hz, 1H), 4.57 (d,  $J = 9.2$  Hz, 1H), 4.46-4.31 (m, 2H), 1.66 (s, 3H), 1.39 (t,  $J = 7.2$  Hz, 3H), 1.34 (s, 3H);  $^{13}\text{C NMR}$  (125 MHz,  $\text{CDCl}_3$ )  $\delta$  177.5, 167.3, 142.5, 139.0, 135.0, 134.2, 131.9, 131.7, 129.4, 129.0, 128.7, 128.6, 128.5, 128.4, 124.94, 124.90, 123.2, 123.1, 98.2, 90.8, 89.8, 89.0, 78.2, 62.1, 52.6, 24.5, 19.9, 14.4; FT-IR (neat) 2985, 2927, 2855, 1732, 1705, 1304, 1048, 754,  $\text{cm}^{-1}$ ; HRMS (ESI)  $m/z$   $[\text{M}+\text{H}]^+$  calcd for  $\text{C}_{36}\text{H}_{32}\text{NO}_5$ : 558.2275, found: 558.2279.

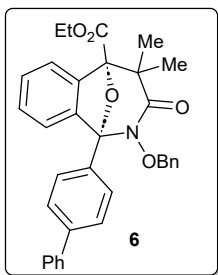

**Ethyl 1-([1,1'-biphenyl]-4-yl)-2-(benzyloxy)-4,4-dimethyl-3-oxo-1,2,3,4-tetrahydro-5H-1,5-epoxybenzo[c]azepine-5-carboxylate 6.** Analytical TLC on silica gel, 1:6.5 ethyl acetate/hexane  $R_f = 0.40$ ; colorless sticky solid; yield 82% (43 mg);  $^1\text{H}$  NMR (400 MHz,  $\text{CDCl}_3$ )  $\delta$  8.06 (d,  $J = 8.4$  Hz, 2H), 7.74 (d,  $J = 8.8$  Hz, 3H), 7.66 (d,  $J = 7.2$  Hz, 2H), 7.64-7.62 (m, 1H), 7.50 (t,  $J = 7.2$  Hz, 2H), 7.43-7.41 (m, 1H), 7.38-7.36 (m, 2H), 7.24-7.20 (m, 3H), 7.07-7.05 (m, 2H), 5.01 (d,  $J = 9.2$  Hz, 1H), 4.65 (d,  $J = 9.2$  Hz, 1H), 4.47-4.31 (m, 2H), 1.69 (s, 3H), 1.39 (t,  $J = 7.2$  Hz, 3H), 1.36 (s, 3H);  $^{13}\text{C}$  NMR (125 MHz,  $\text{CDCl}_3$ )  $\delta$  177.6, 167.4, 142.7, 140.6, 139.1, 135.1, 133.3, 129.34, 129.0, 128.90, 128.88, 128.5, 128.3, 127.9, 127.4, 127.2, 124.8, 123.3, 98.5, 89.7, 78.1, 62.1, 52.5, 24.5, 19.9, 14.4; FT-IR (neat) 2986, 2940, 1730, 1700, 1304, 1048, 750, 697,  $\text{cm}^{-1}$ ; HRMS (ESI)  $m/z$   $[\text{M}+\text{H}]^+$  calcd for  $\text{C}_{34}\text{H}_{32}\text{NO}_5$ : 534.2275, found: 534.2269.

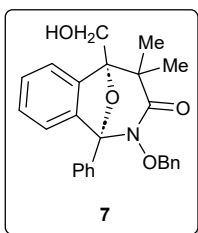

**2-(Benzyloxy)-5-(hydroxymethyl)-4,4-dimethyl-1-phenyl-1,2,4,5-tetrahydro-3H-1,5-epoxybenzo[c]azepin-3-one 7.** Analytical TLC on silica gel, 2:8 ethyl acetate/hexane  $R_f = 0.30$ ; colorless sticky liquid; yield 79% (33 mg);  $^1\text{H}$  NMR (600 MHz,  $\text{CDCl}_3$ )  $\delta$  7.99-7.97 (m, 2H), 7.59 (d,  $J = 7.2$  Hz, 1H), 7.55-7.53 (m, 3H), 7.38-7.31 (m, 3H), 7.23-7.18 (m, 3H), 6.99-6.98 (m, 2H), 4.96 (d,  $J = 9.0$  Hz, 1H), 4.60 (d,  $J = 9.0$  Hz, 1H), 4.21 (d,  $J = 12.0$  Hz, 1H), 4.14 (d,  $J = 12.6$  Hz, 1H), 1.66 (s, 4H), 1.16 (s, 3H);  $^{13}\text{C}$  NMR (150 MHz,  $\text{CDCl}_3$ )  $\delta$  179.4, 143.7, 140.8, 135.4, 135.0, 129.9, 129.2, 128.6, 128.4, 128.34, 128.30, 128.28, 123.9, 123.5, 99.5, 90.9, 77.8, 60.2, 50.7, 23.9, 19.6; FT-IR (neat) 2975, 2917, 1762, 1356, 1148, 734,  $\text{cm}^{-1}$ ; HRMS (ESI)  $m/z$   $[\text{M}+\text{H}]^+$  calcd for  $\text{C}_{26}\text{H}_{26}\text{NO}_4$ : 416.1856, found: 416.1850.



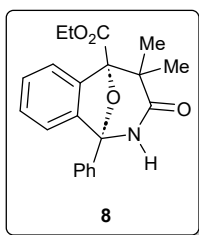

**Ethyl-4,4-dimethyl-3-oxo-1-phenyl-1,2,3,4-tetrahydro-5H-1,5-epoxybenzo[c]azepine-5-carboxylate **8**.**

Analytical TLC on silica gel, 2:8 ethyl acetate/hexane  $R_f = 0.30$ ; colorless sticky solid; yield 75% (26 mg);  $^1\text{H NMR}$  (500 MHz,  $\text{CDCl}_3$ )  $\delta$  7.72-7.67 (m, 3H), 7.50-7.47 (m, 3H), 7.34-7.26 (m, 2H), 7.15-7.13 (m, 1H), 7.03 (d,  $J = 7.0$  Hz, 1H), 4.46-4.33 (m, 2H), 1.53 (s, 3H), 1.40 (t,  $J = 7.0$  Hz, 3H), 1.34 (s, 3H);  $^{13}\text{C NMR}$  (125 MHz,  $\text{CDCl}_3$ )  $\delta$  175.4, 168.0, 147.6, 138.3, 135.3, 129.9, 129.0, 128.9, 128.0, 126.6, 124.7, 120.2, 92.5, 90.0, 62.0, 48.9, 24.3, 20.6, 14.4; FT-IR (neat) 2925, 2907, 1782, 1754, 1340, 1188, 788,  $\text{cm}^{-1}$ ; HRMS (ESI)  $m/z$   $[\text{M}+\text{H}]^+$  calcd for  $\text{C}_{21}\text{H}_{22}\text{NO}_4$ : 352.1543, found: 352.1547.

### References

- (1) A. Suneja, H. J. Loui and C. Schneider, *Angew. Chem. Int. Ed.*, 2020, **59**, 5536; (b) L. Tu, S. Li, L.-M. Gao, B.-W. Tang, Y.-S. Zheng and J.-K. Liu, *J. Org. Chem.*, 2024, **89**, 9031; (c) P. Jia, Z. Lin, S. Yan, J. Liang, C. Luo, R. Lai, L. Hai, Z. Yang and Y. Wu, *Org. Lett.*, 2023, **25**, 5134; (d) H. J. Loui, A. Suneja and C. Schneider, *Org. Lett.*, 2021, **23**, 2578.
- (2) C. S. Jeffrey, K. L. Barnes, J. A. Eickhoff and C. R. Carson, *J. Am. Chem. Soc.*, 2011, **133**, 7688; (b) P. Karjee, S. Mandal, B. Debnath, N. Namdev and T. Punniyamurthy, *Chem. Commun.*, 2023, **59**, 8270; (c) J. Feng, M. Zhou, X. Lin, A. Lu, X. Zhang and M. Zhao, *Org. Lett.*, 2019, **21**, 6245; (d) I. M. Taily, D. Saha and P. Banerjee, *J. Org. Chem.*, 2022, **87**, 2155.
- (3) H. Bhattacharyya, S. Saha, K. Verma and T. Punniyamurthy, *Org. Lett.*, 2023, **25**, 6830.
- (4) S. Saha, B. Debnath, K. Talukdar, P. Karjee, S. Mandal and T. Punniyamurthy, *Org. Lett.*, 2023, **25**, 3352.
- (5) H. J. Loui, A. Suneja and C. Schneider, *Org. Lett.*, 2021, **23**, 2578.
- (6) M. C. DiPoto, R. P. Hughes and J. Wu, *J. Am. Chem. Soc.*, 2015, **137**, 14861.

# $^1\text{H}$ , $^{13}\text{C}$ and $^{19}\text{F}$ NMR spectra

KV-386-1H

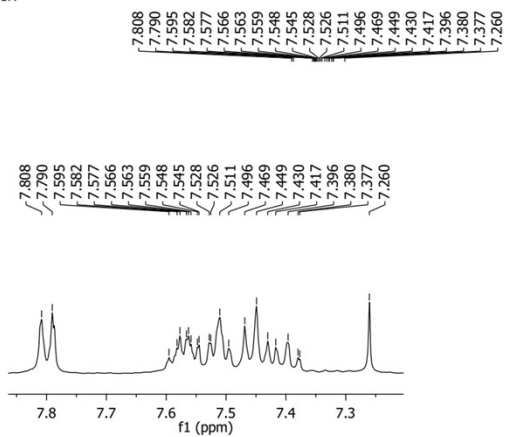

4.115  
4.097  
4.079  
4.061

1.144  
1.126  
1.108

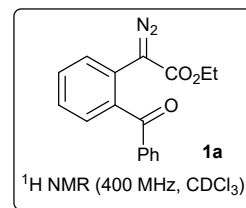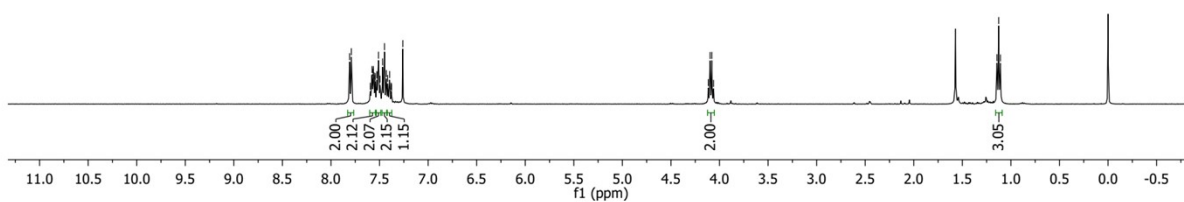

KV-438-1H

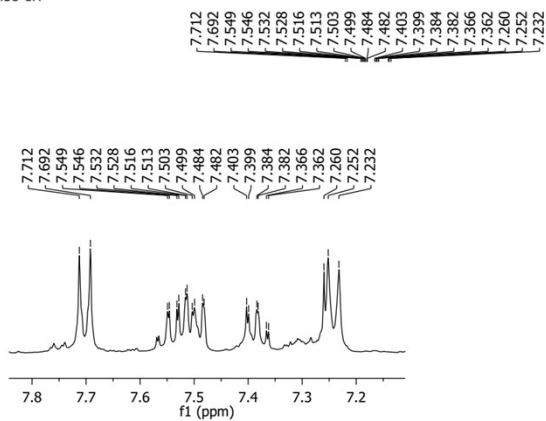

4.123  
4.105  
4.087  
4.070

2.418

1.150  
1.132  
1.115

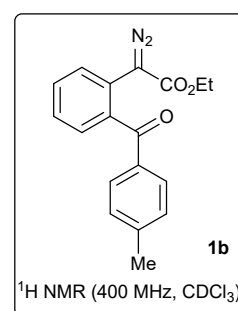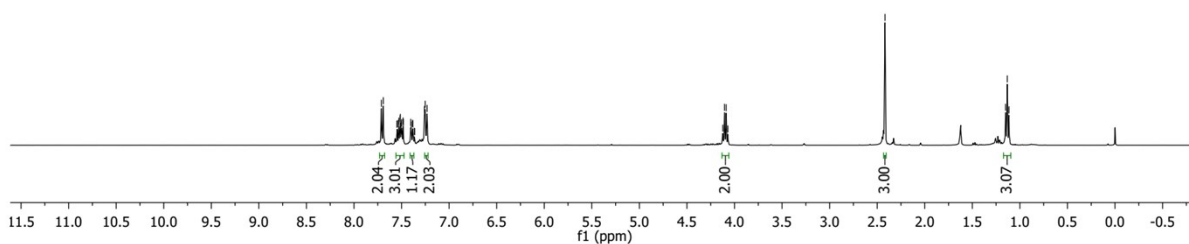

KV-419-1H

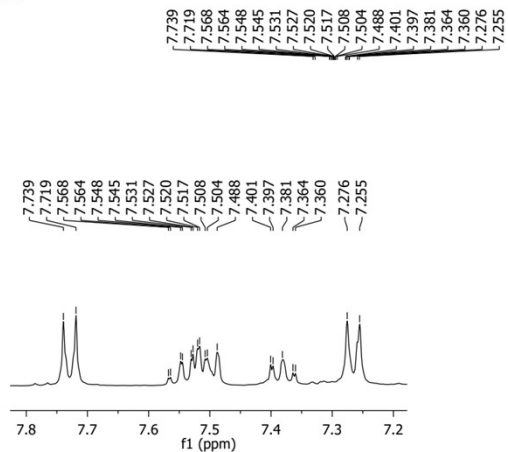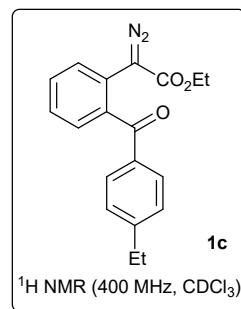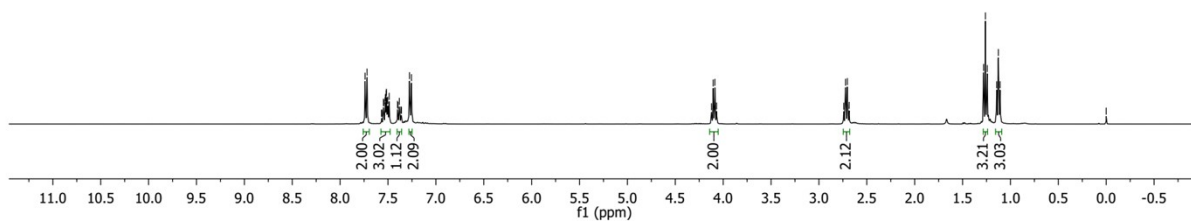

KV-419-13C

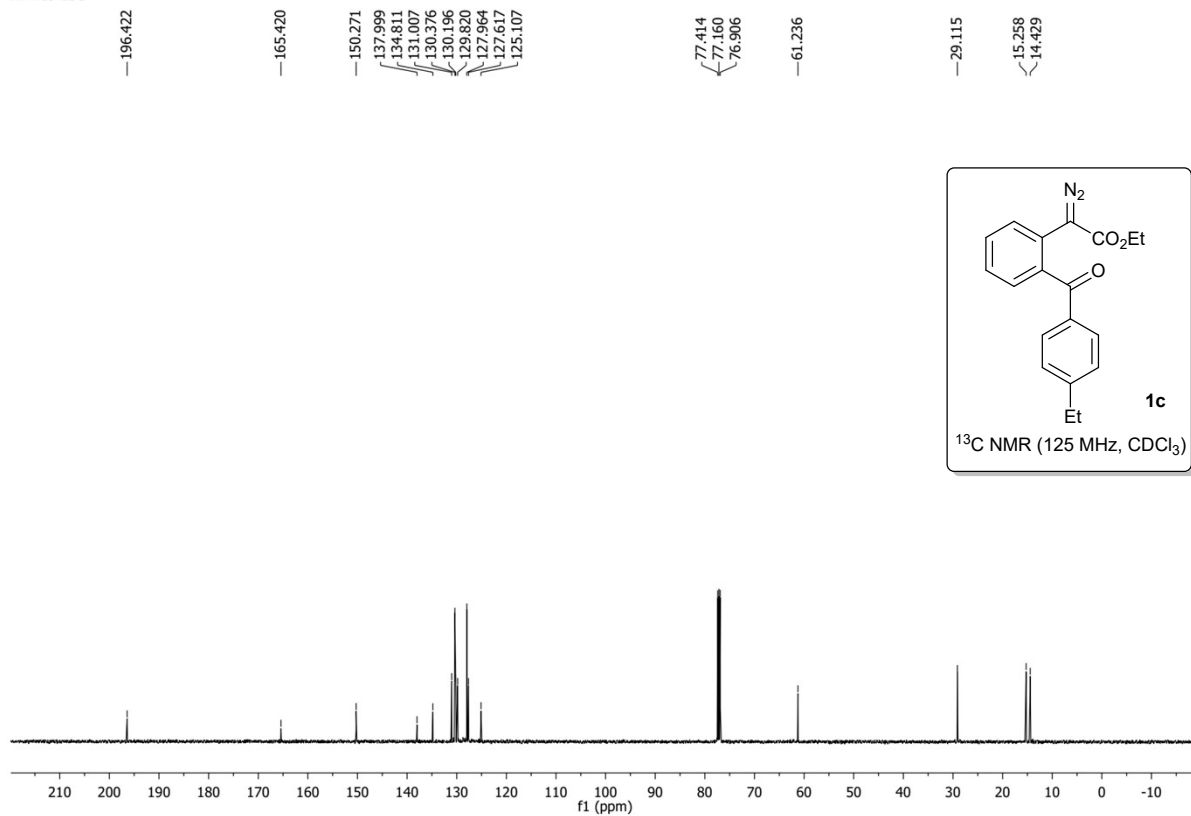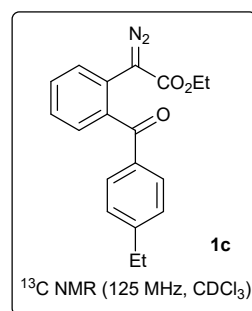

KV-429-1H

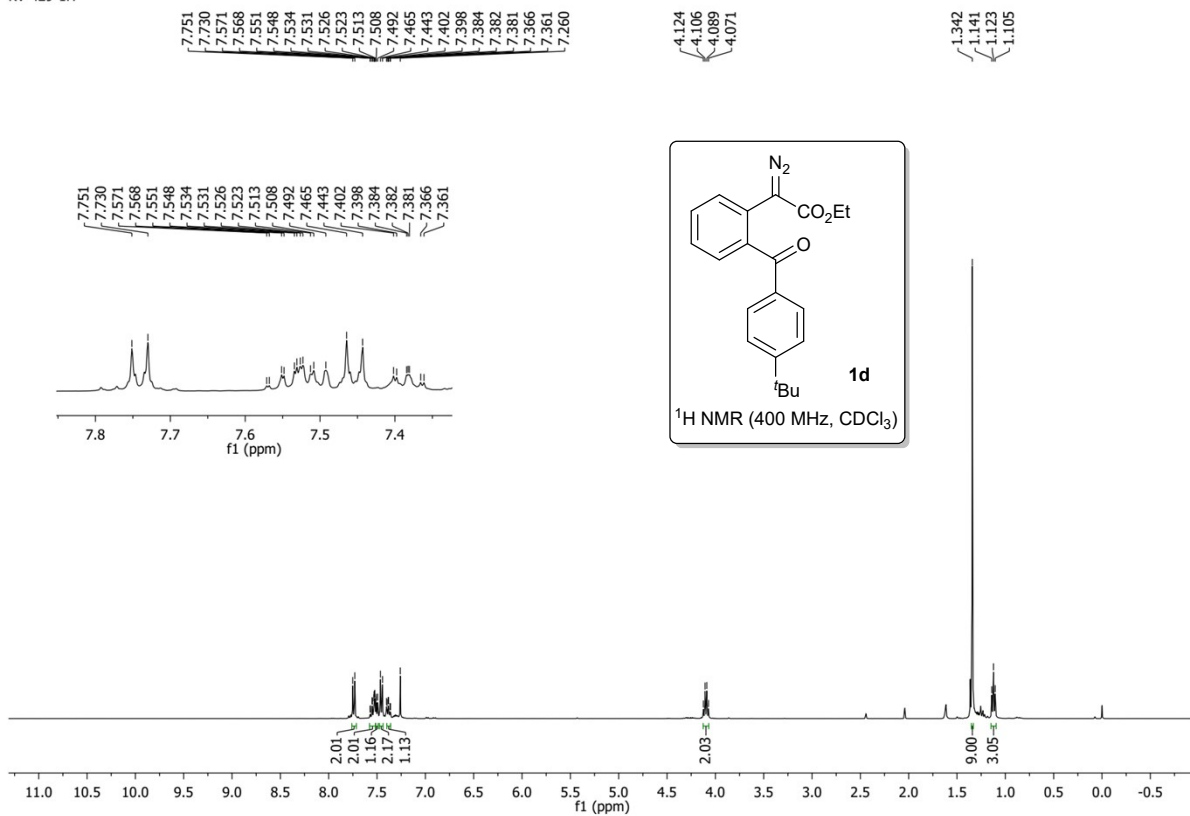

KV-429-13C

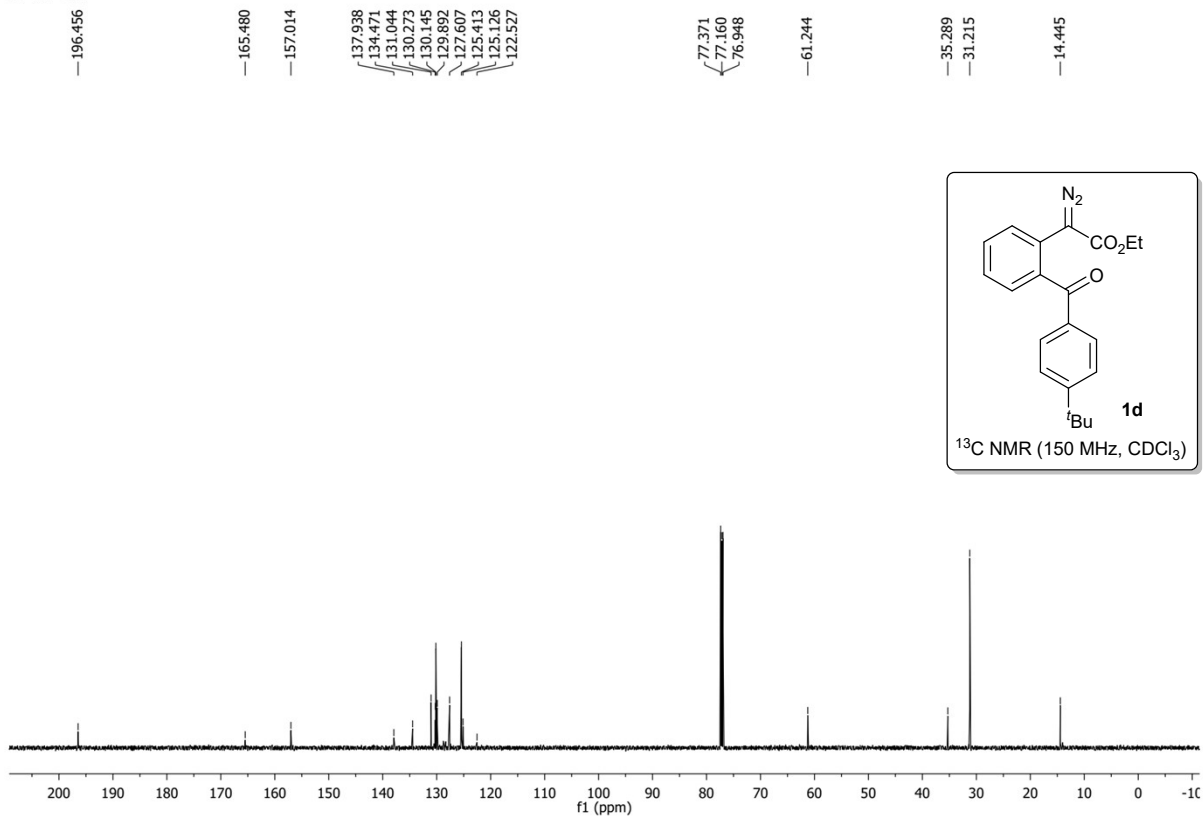

KV-413-1H

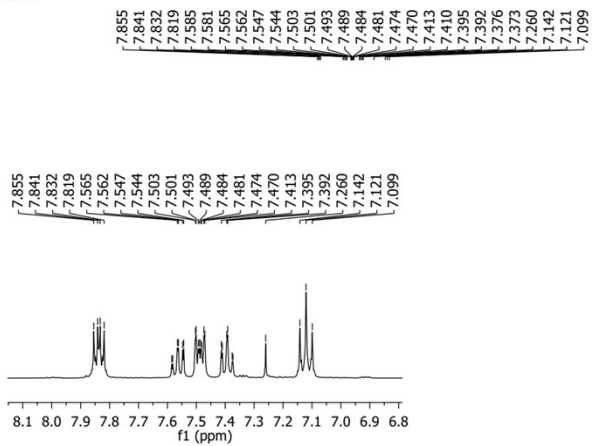

4.125  
4.107  
4.089  
4.072

1.160  
1.142  
1.124

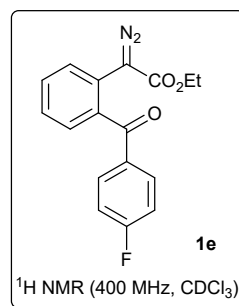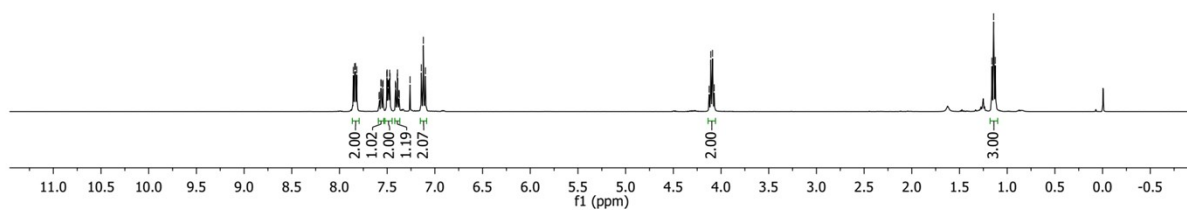

KV-406-1H

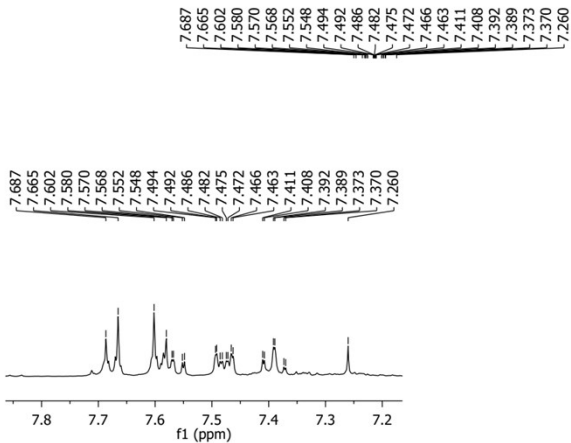

4.128  
4.110  
4.092  
4.074

1.167  
1.150  
1.132

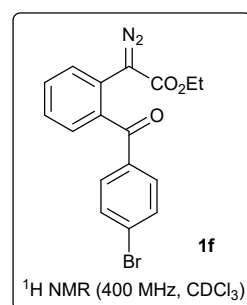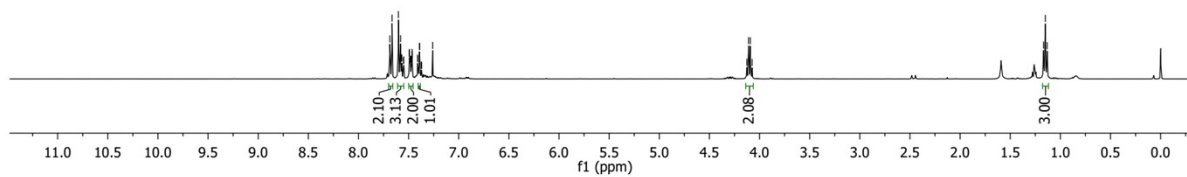

KV-405-1H

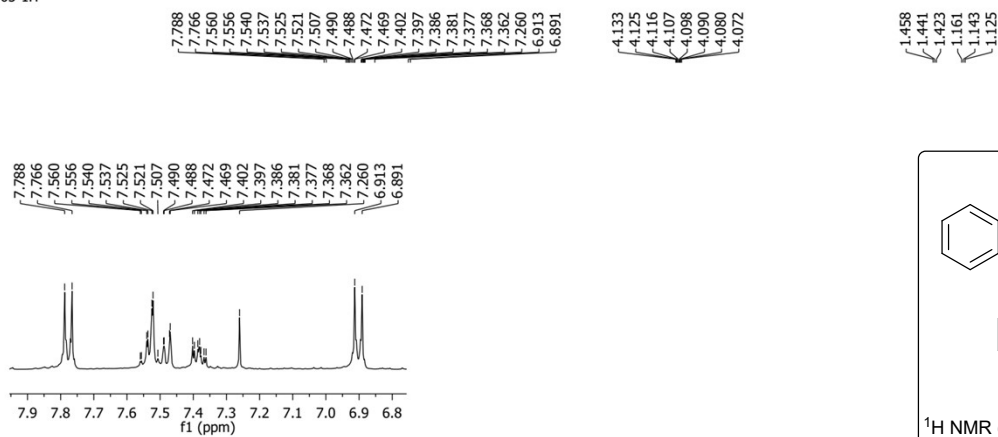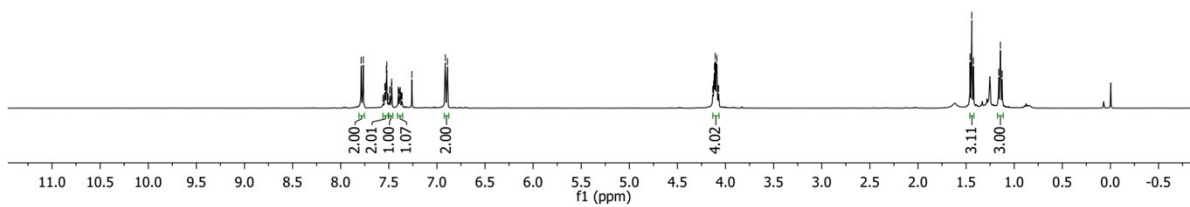

KV-405-13C

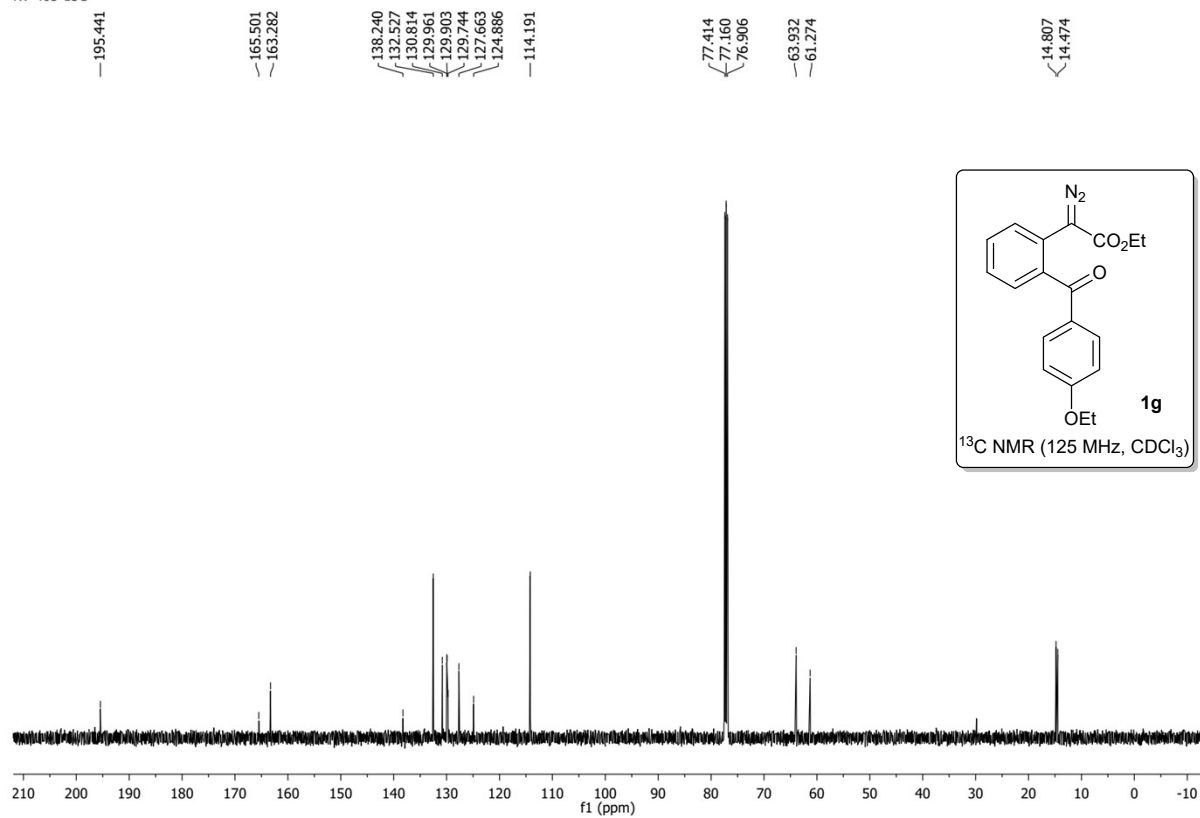

KV-424-1H

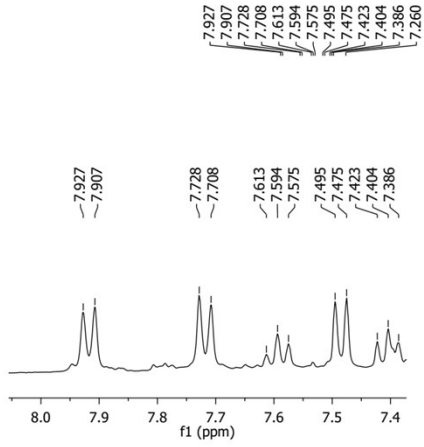

4.118  
4.100  
4.082  
4.065

1.155  
1.137  
1.120

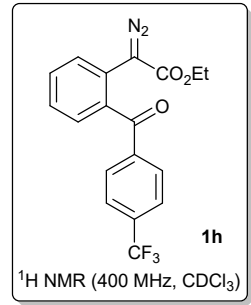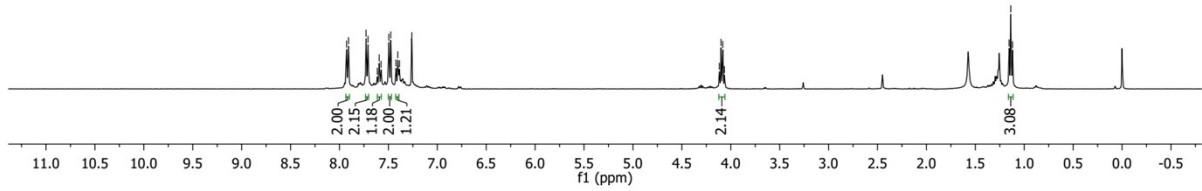

KV-471-1H

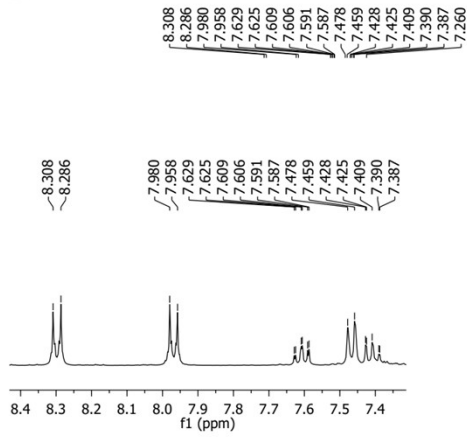

4.116  
4.098  
4.080  
4.062

1.167  
1.149  
1.131

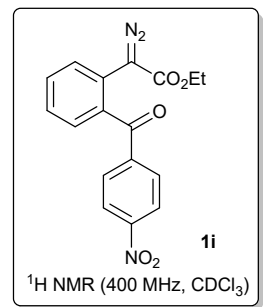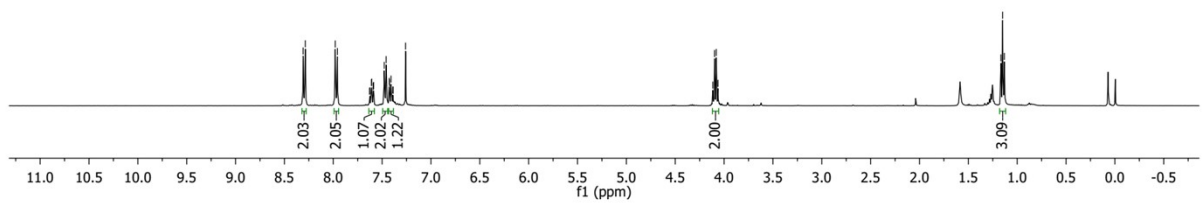

KV-ESTER-1H

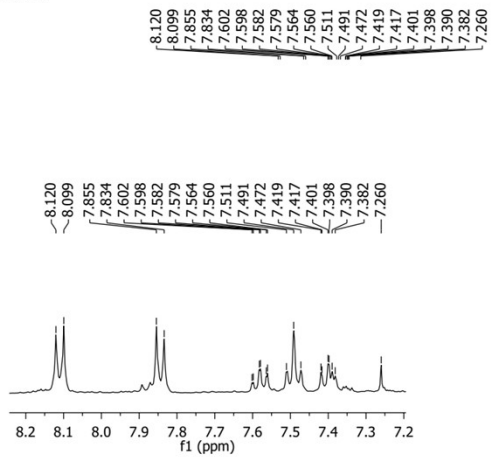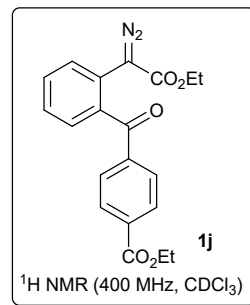

KV-ESTER-13C

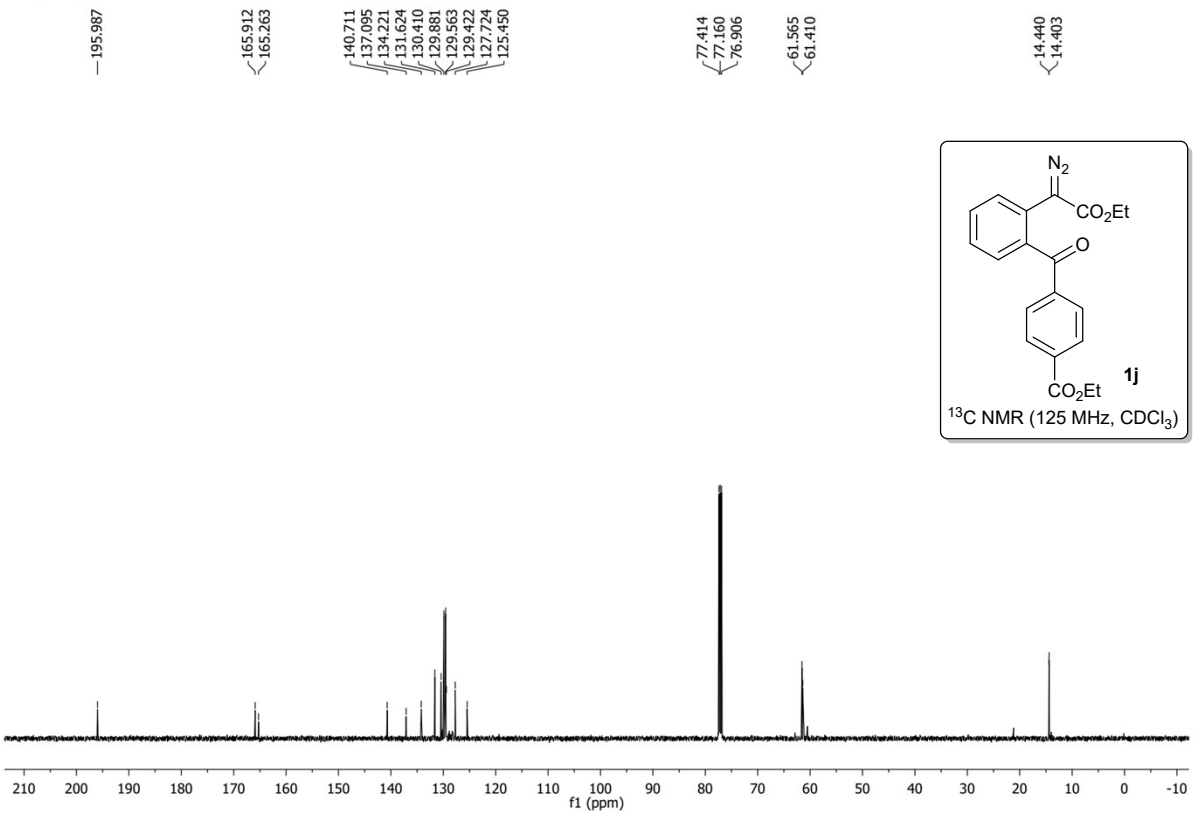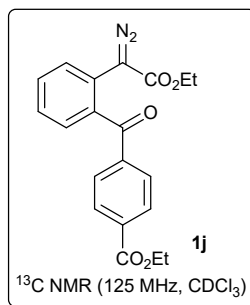





KV-437-1H

7.574  
7.570  
7.554  
7.551  
7.536  
7.533  
7.518  
7.514  
7.509  
7.499  
7.493  
7.490  
7.387  
7.384  
7.381  
7.364  
7.347  
7.343  
7.260  
7.216  
7.196  
7.178  
7.176

4.176  
4.158  
4.140  
4.122

2.477

1.204  
1.186  
1.169

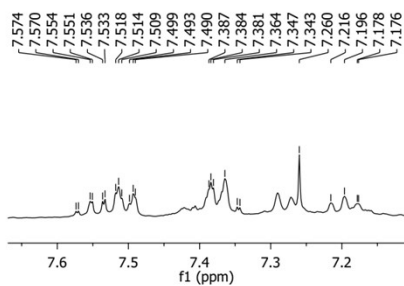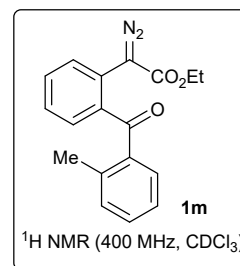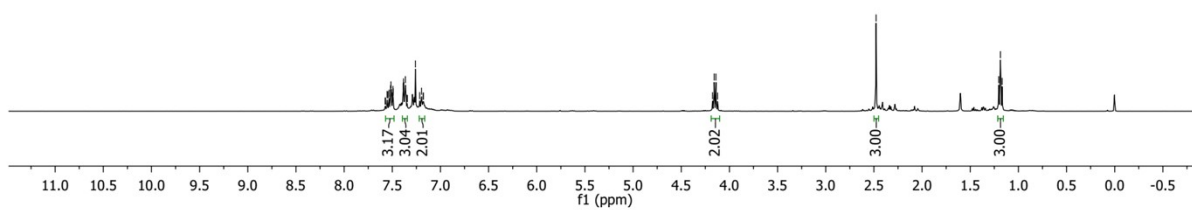

KV-437-13C

198.352

165.514

139.148  
138.416  
137.458  
131.713  
131.697  
131.553  
131.392  
130.905  
130.298  
127.954  
125.594  
125.383

77.414  
77.160  
76.906

61.236

20.854  
14.502

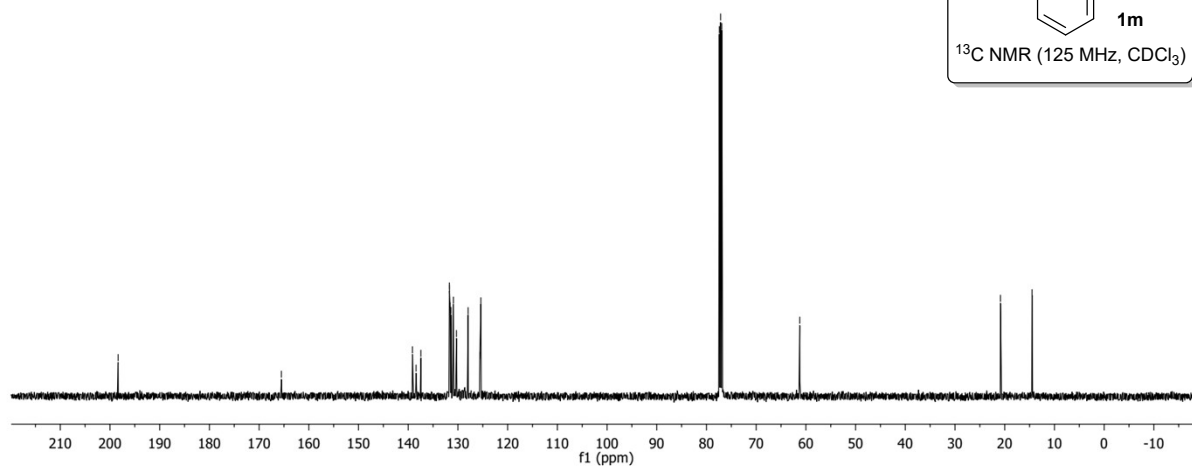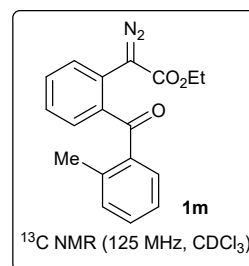

KV-446-1H

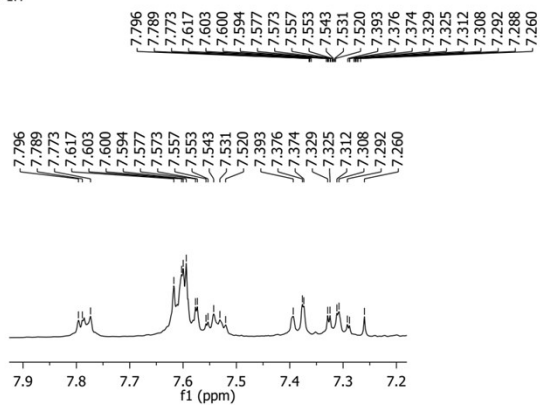

4.266  
4.248  
4.230  
4.213

1.288  
1.271  
1.253

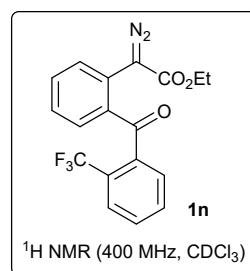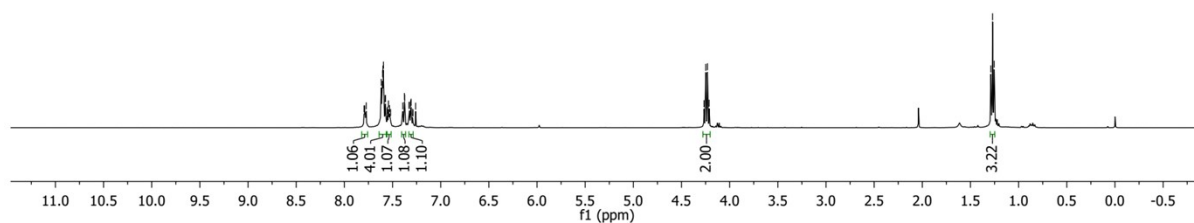

KV-446-13C

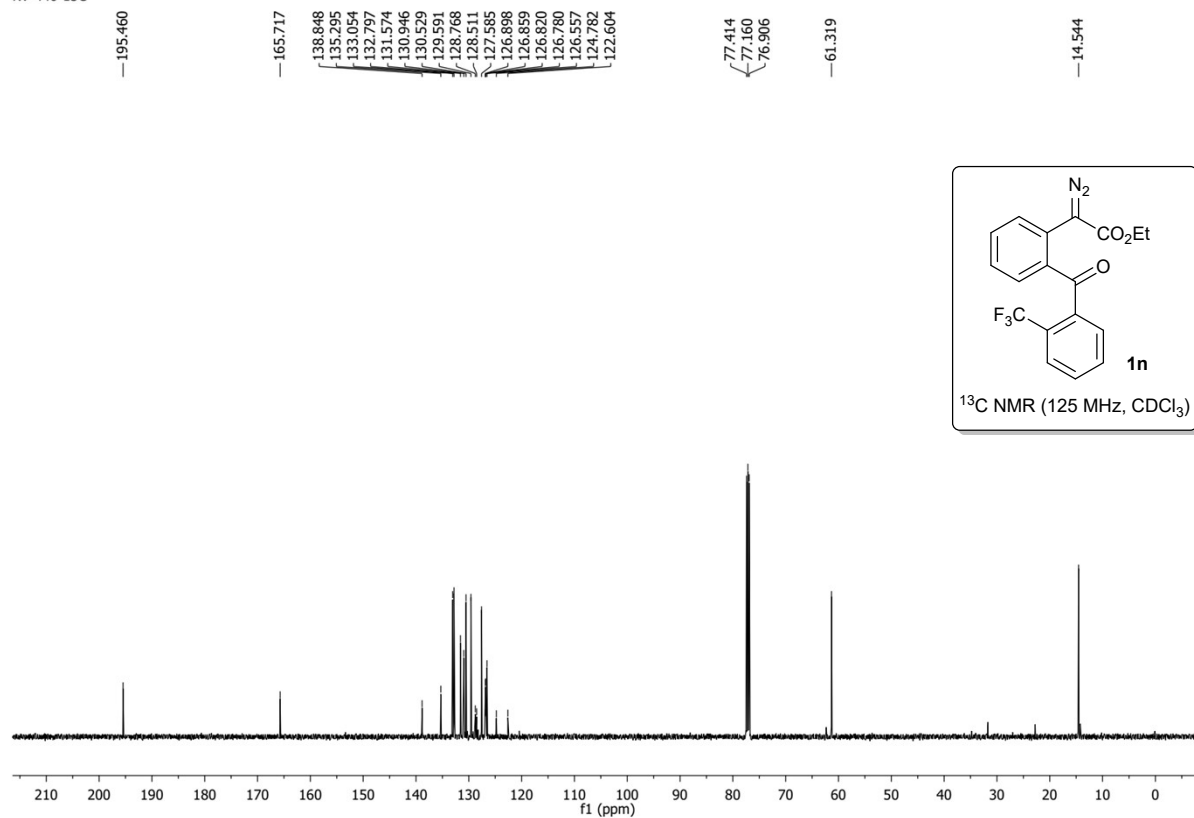

195.460

165.717

138.848  
135.795  
133.054  
132.797  
131.574  
130.946  
130.529  
129.591  
128.768  
128.511  
127.585  
126.898  
126.859  
126.820  
126.780  
126.557  
124.782  
122.604

77.414  
77.160  
76.906

61.319

14.544

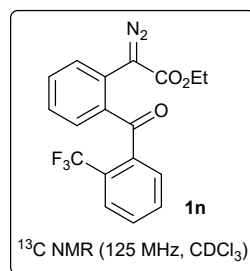

KV-414-1H

7.569  
7.566  
7.549  
7.546  
7.534  
7.530  
7.515  
7.494  
7.480  
7.476  
7.460  
7.403  
7.409  
7.393  
7.403  
7.389  
7.393  
7.388  
7.388  
7.374  
7.368  
7.374  
7.330  
7.325  
7.309  
7.304  
7.260  
7.304  
6.855  
6.855  
6.834

4.142  
4.124  
4.106  
4.088  
3.939  
3.915

1.167  
1.149  
1.131

7.549  
7.546  
7.534  
7.530  
7.494  
7.485  
7.480  
7.476  
7.409  
7.403  
7.393  
7.389  
7.389  
7.388  
7.388  
7.374  
7.368  
7.330  
7.325  
7.309  
7.304  
7.260  
6.855  
6.834

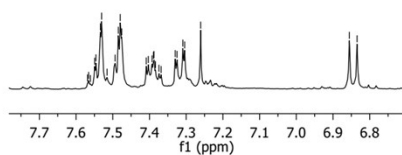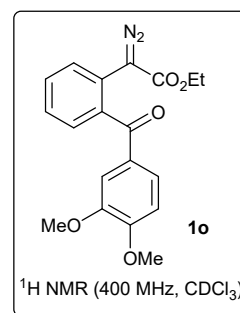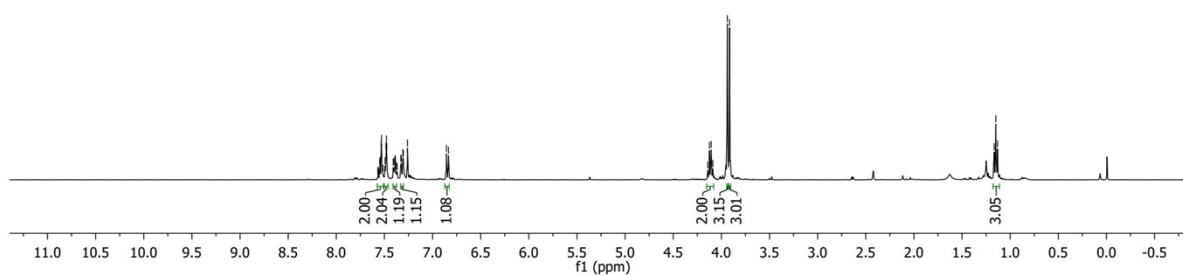

KV-453-1H

7.557  
7.537  
7.534  
7.537  
7.534  
7.520  
7.517  
7.511  
7.473  
7.470  
7.511  
7.473  
7.470  
7.453  
7.470  
7.453  
7.391  
7.378  
7.374  
7.391  
7.378  
7.369  
7.365  
7.374  
7.359  
7.365  
7.330  
7.326  
7.310  
7.330  
7.306  
7.260  
7.310  
7.260  
7.306  
6.821  
6.801

6.051

4.157  
4.139  
4.121  
4.103

1.187  
1.169  
1.152

7.554  
7.537  
7.534  
7.537  
7.534  
7.520  
7.517  
7.511  
7.473  
7.470  
7.511  
7.473  
7.470  
7.453  
7.470  
7.453  
7.391  
7.378  
7.374  
7.391  
7.378  
7.369  
7.365  
7.374  
7.359  
7.365  
7.330  
7.326  
7.310  
7.330  
7.306  
7.260  
7.310  
7.260  
7.306  
6.821  
6.801

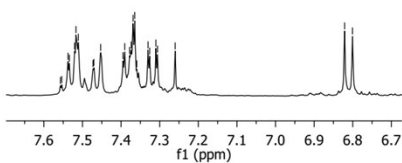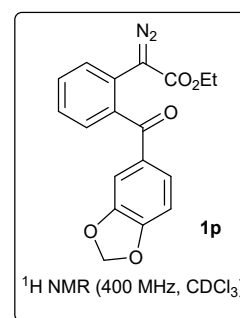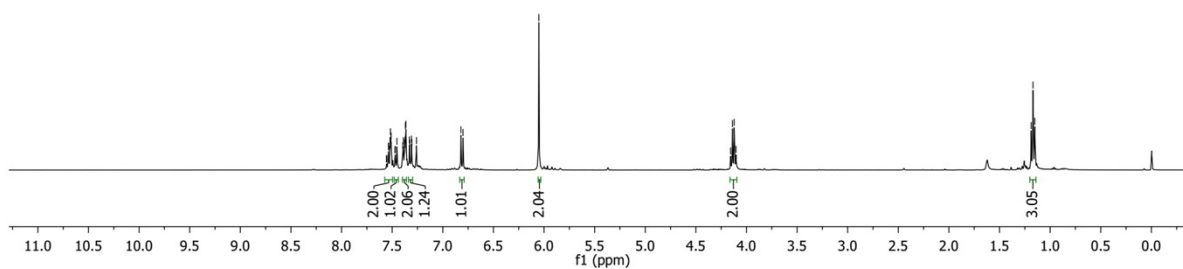

KV-454-1H

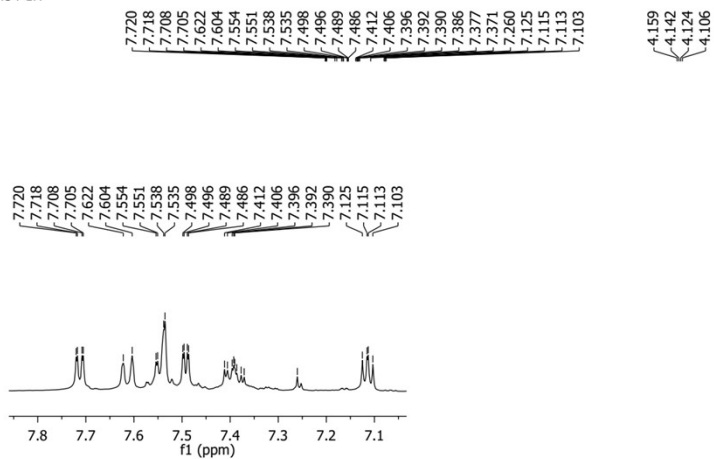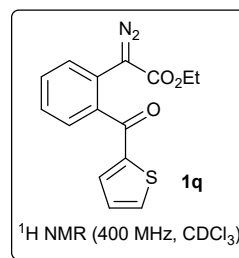

KV-467-1H

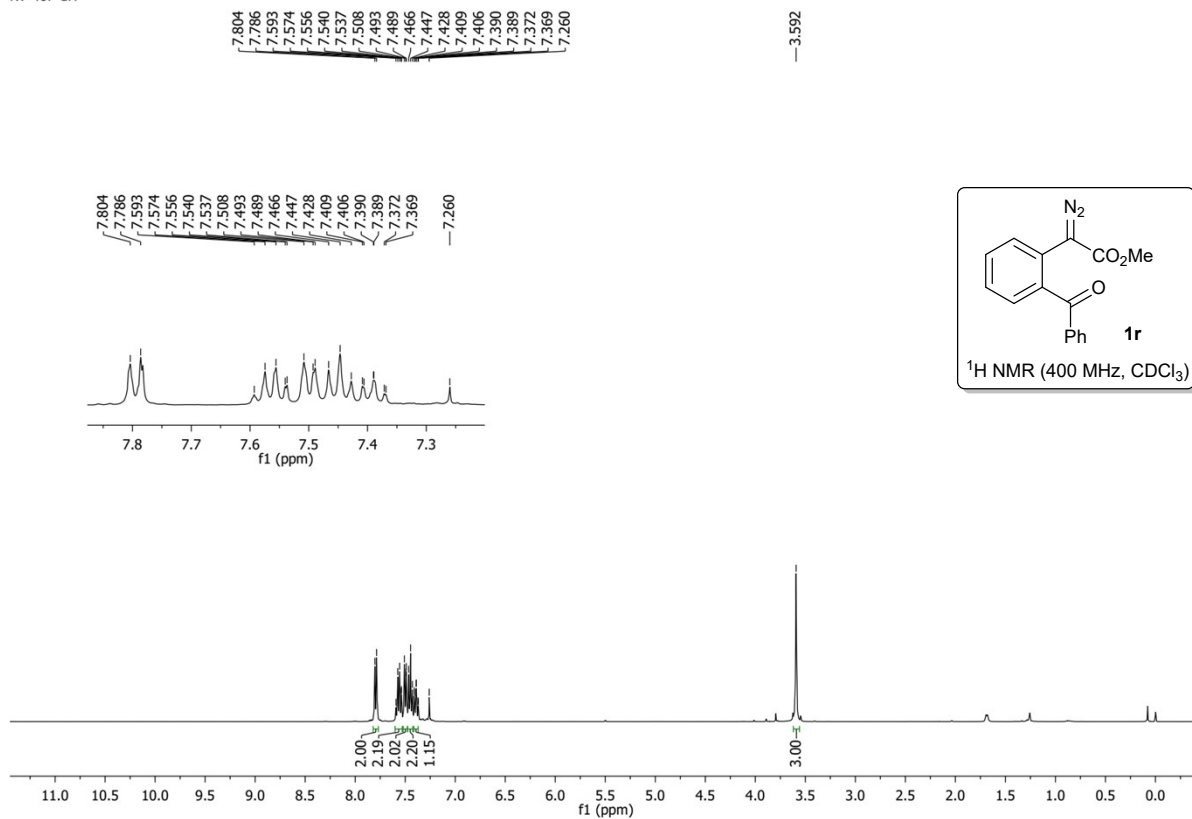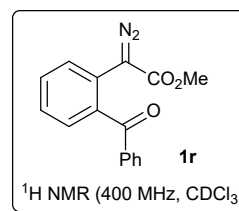

KV-520-1H

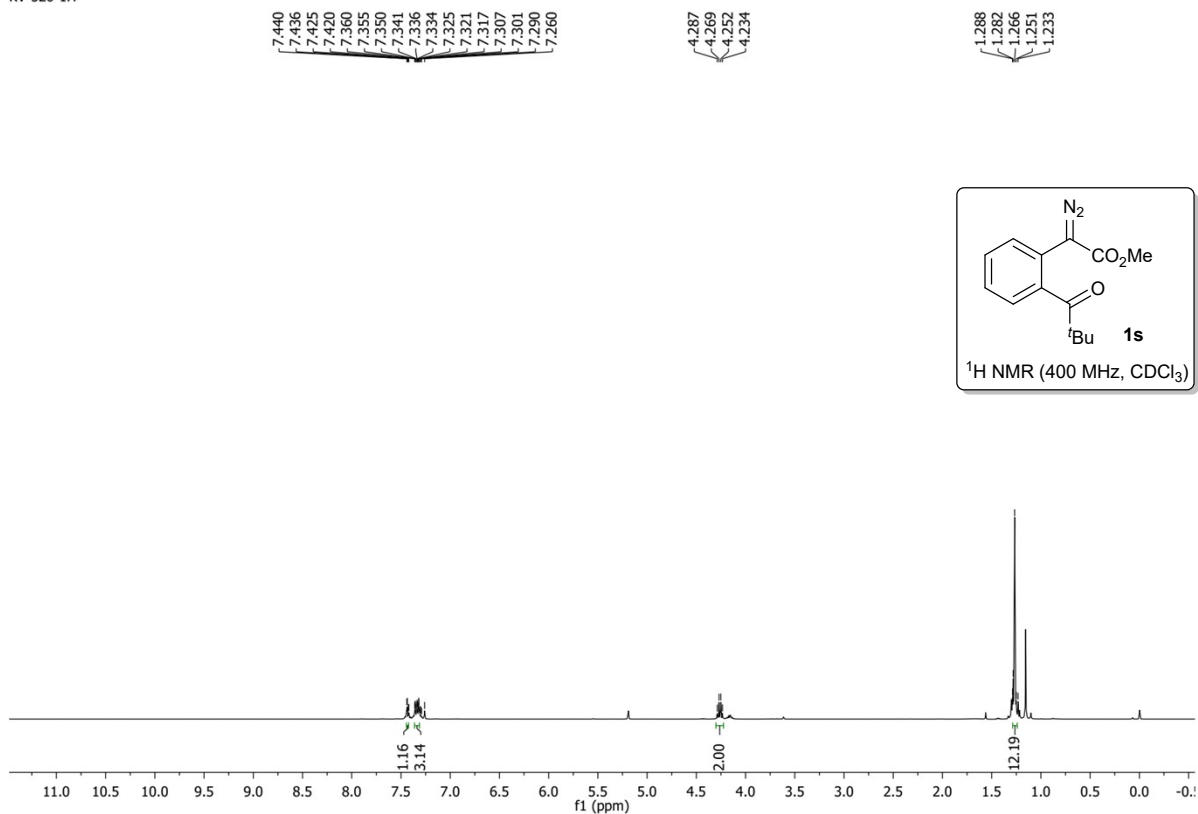

KV-364-1H

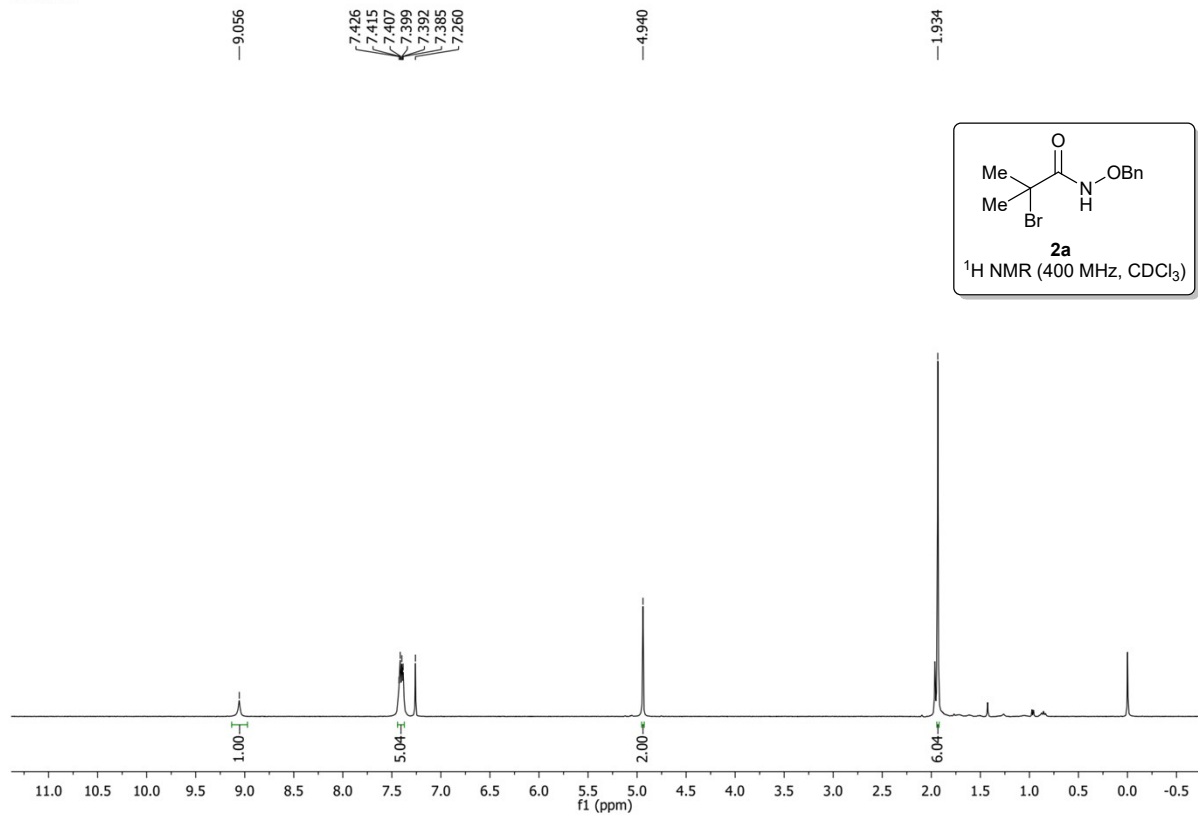

KV-398-1H

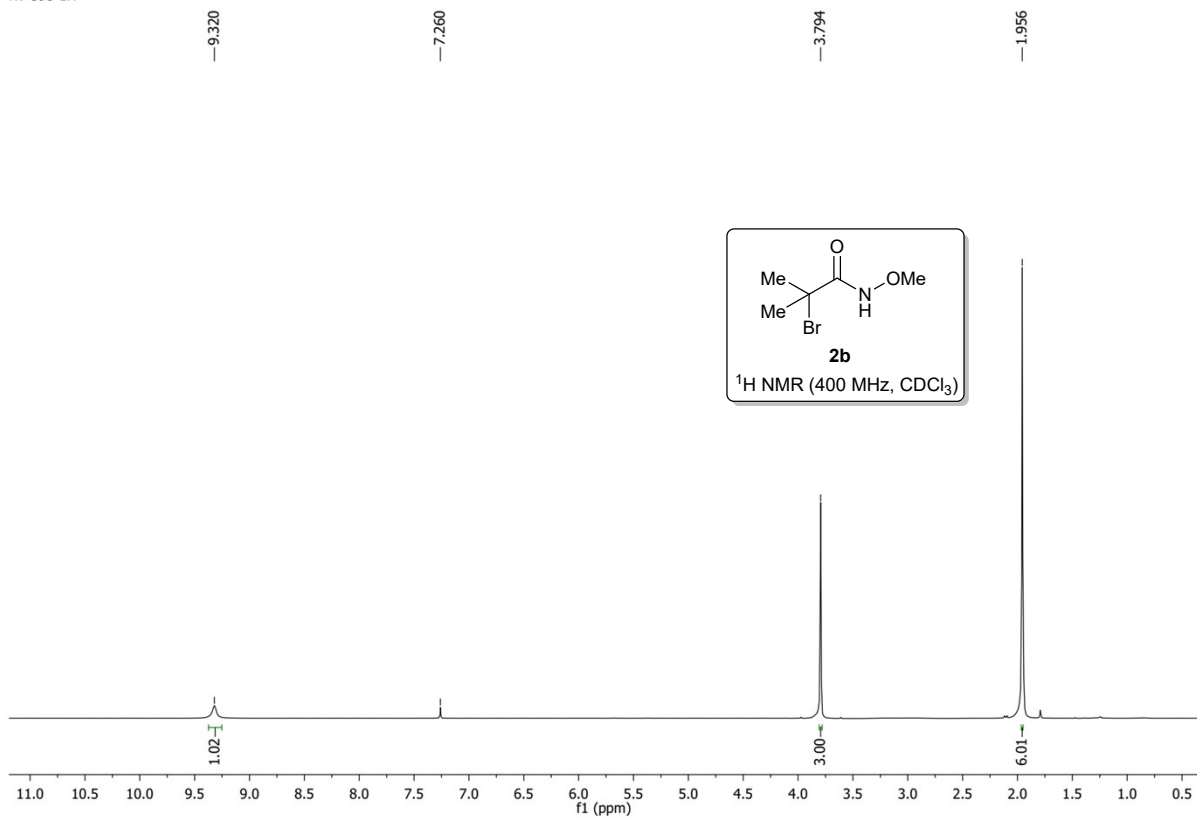

KV-399-1H

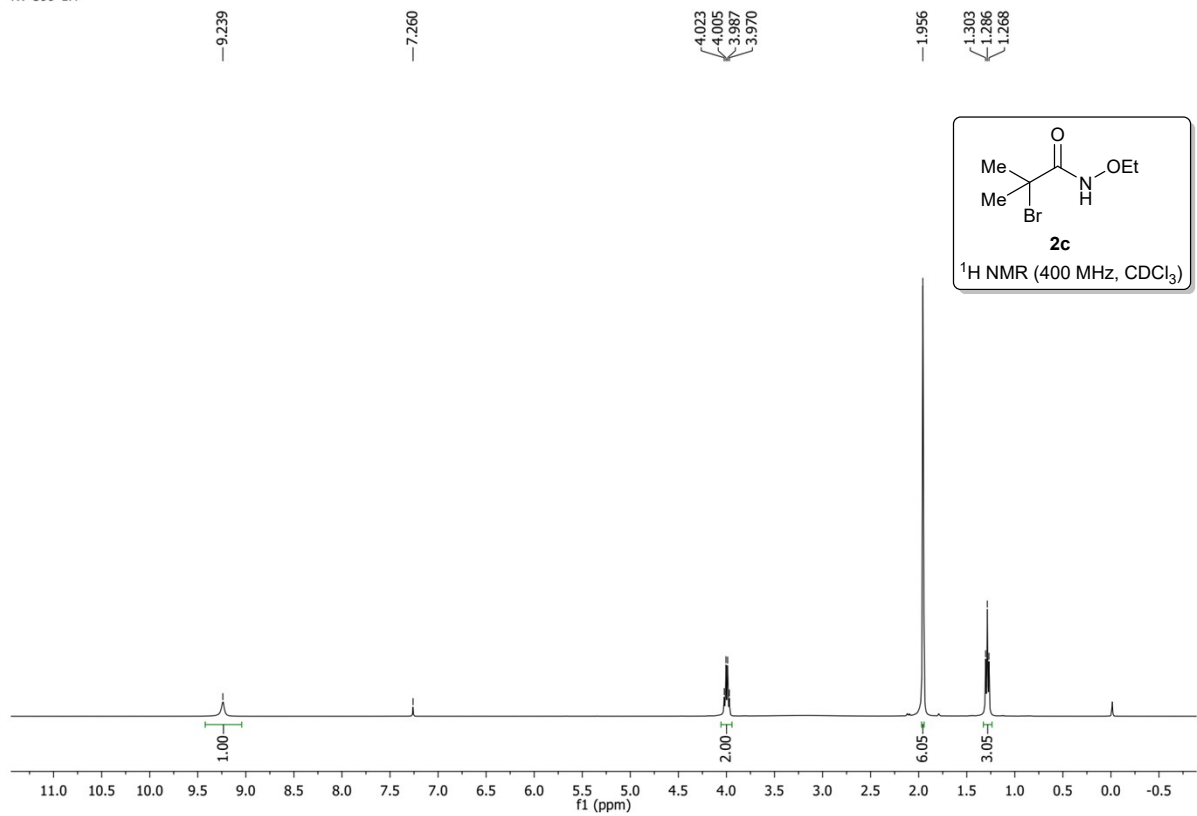

KV-477-1H

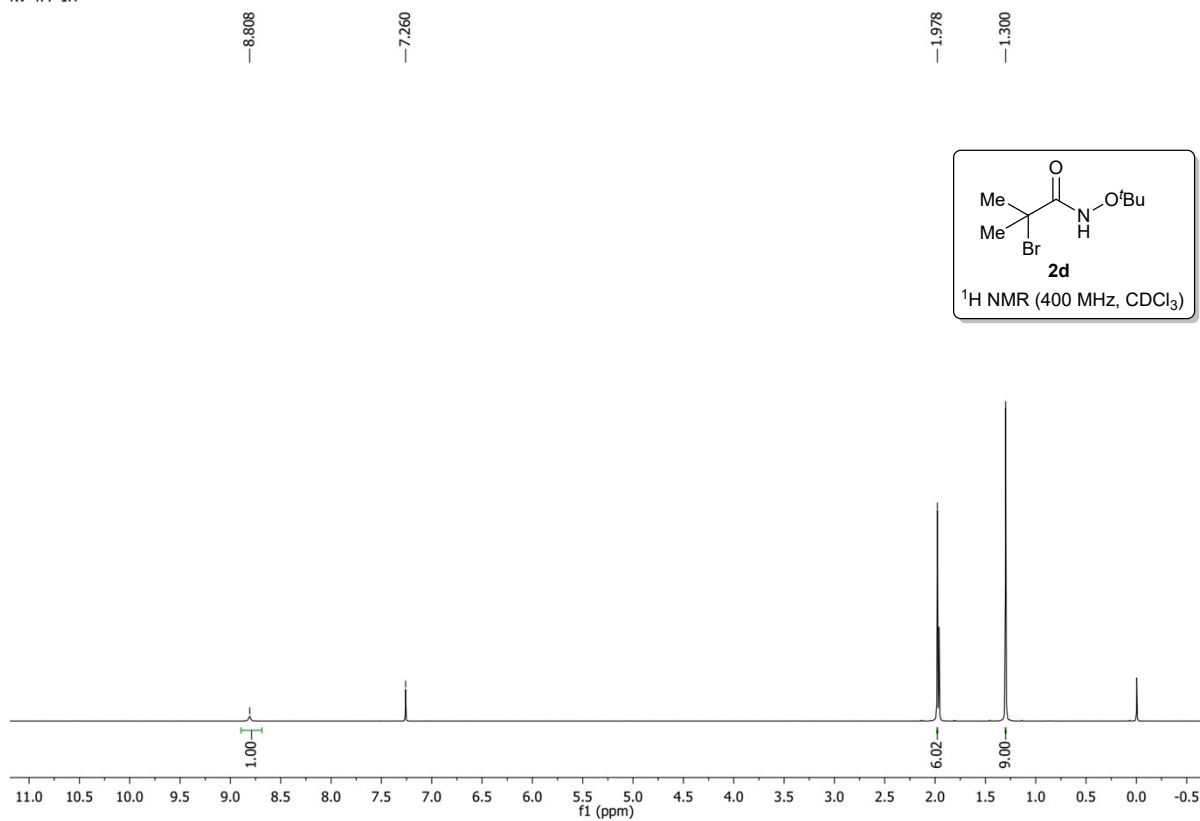

KV-397-1H

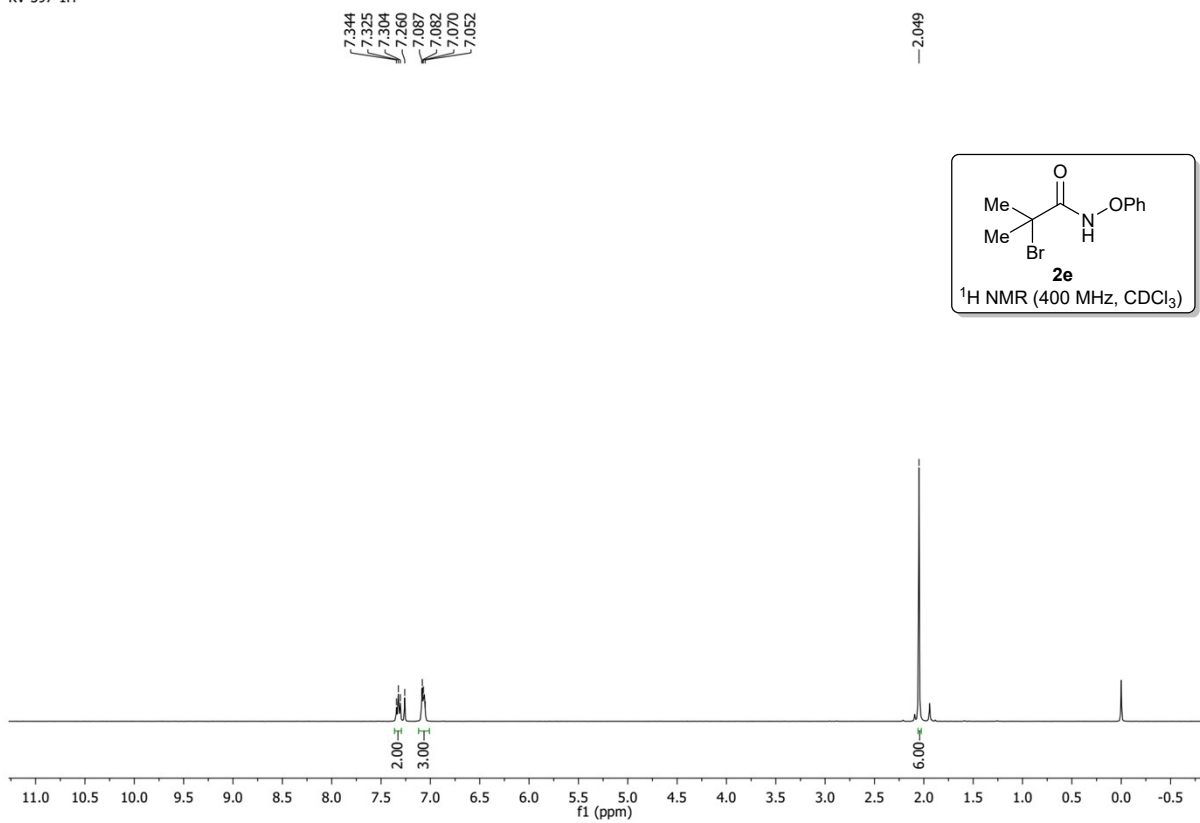



KV-463-1H

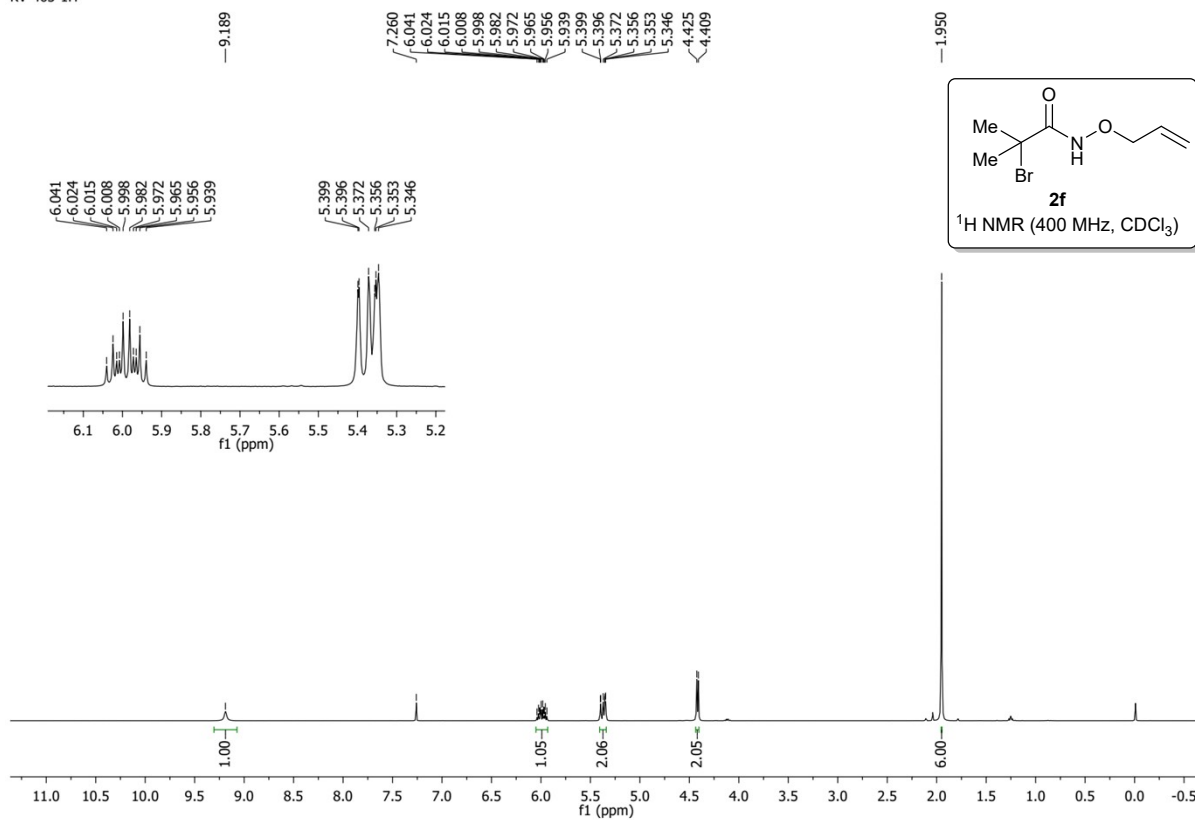

KV-4AME-1H

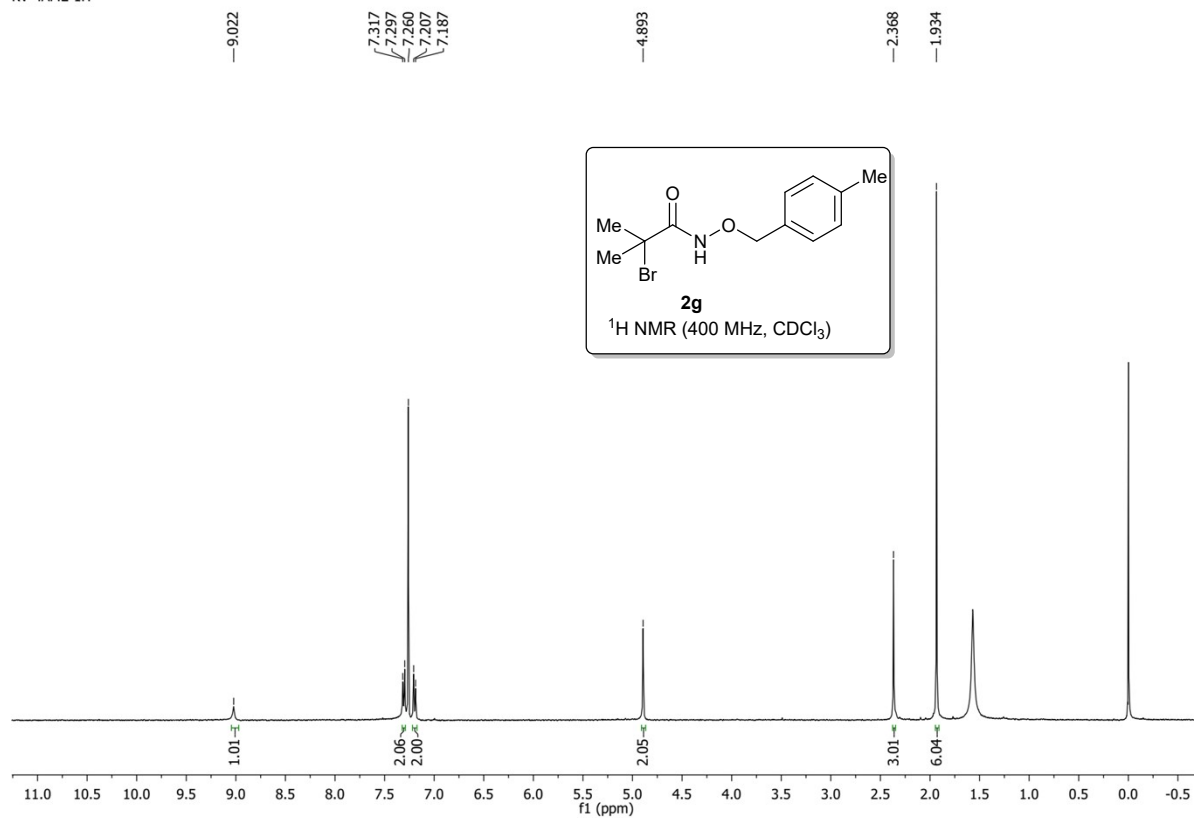

KV-391-1H

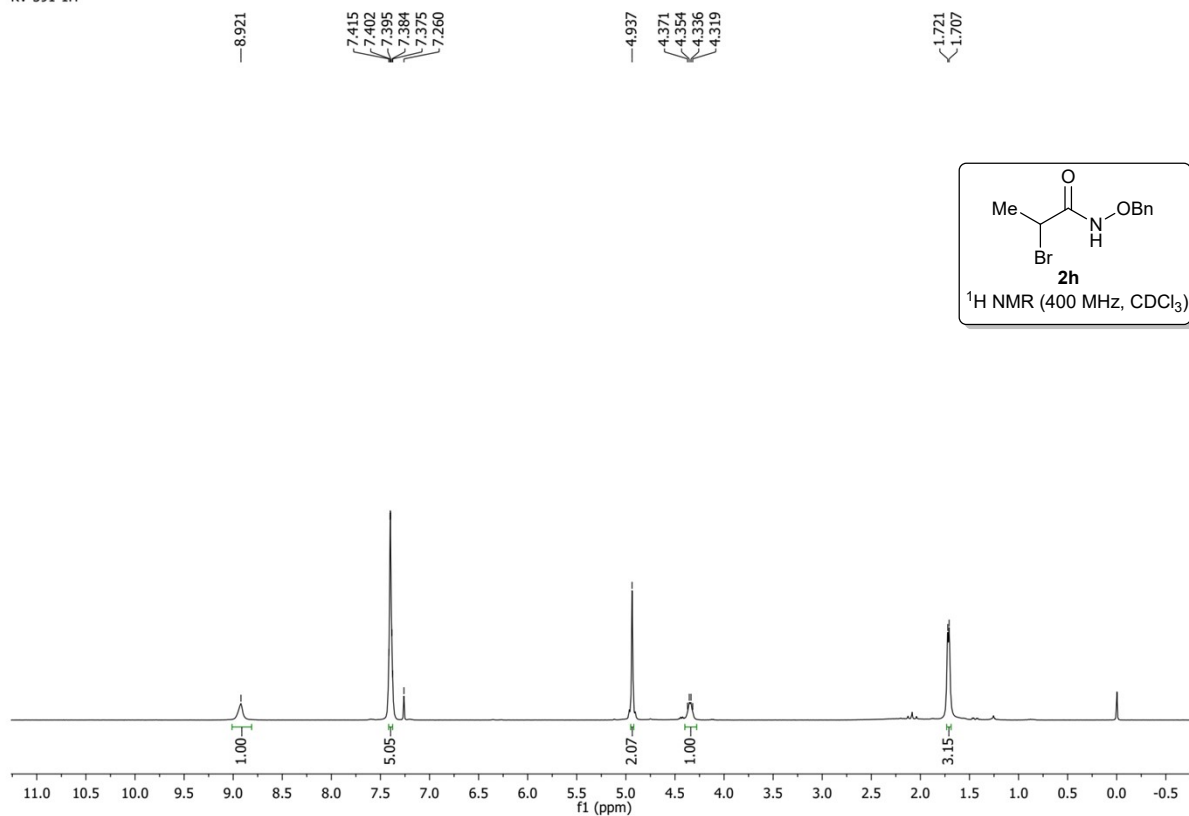

KV-DIETHYL-1H

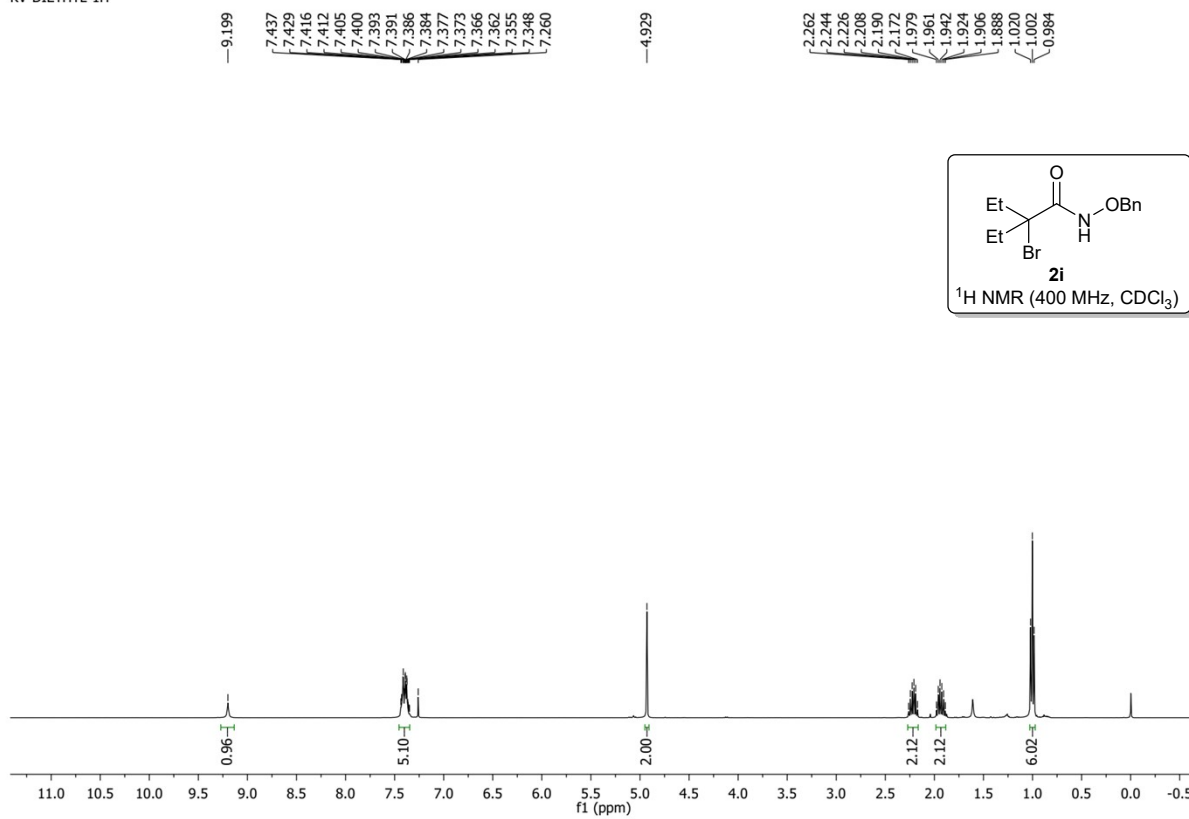

KV-DIETHYL-13C

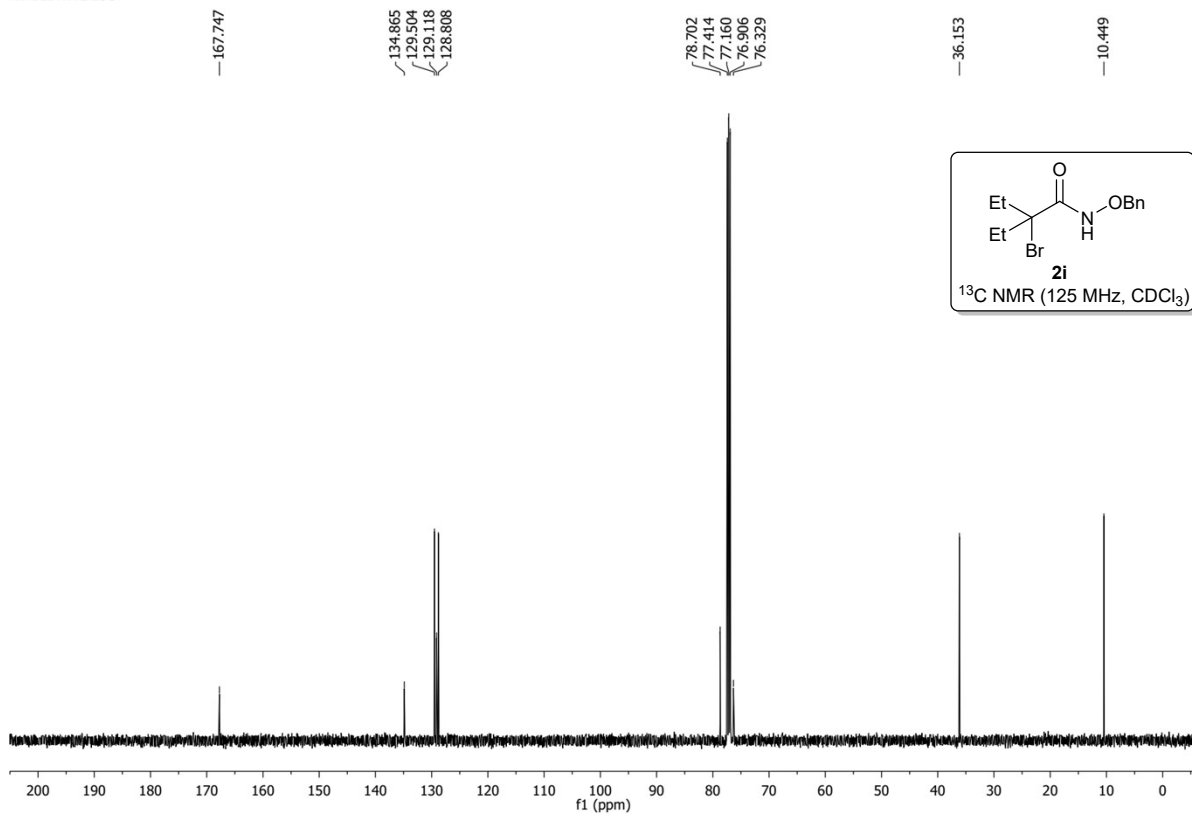

KV-CYCLOHEXYL-1H

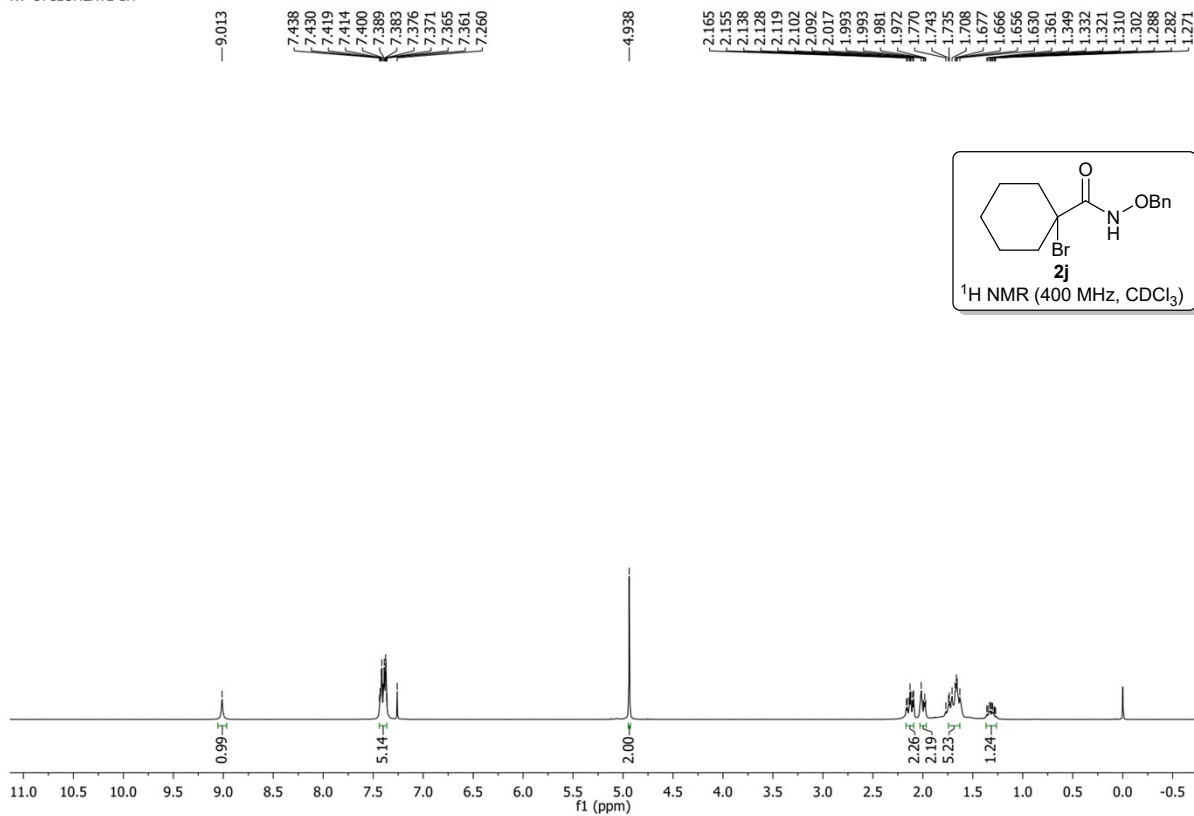

KV-83-1H

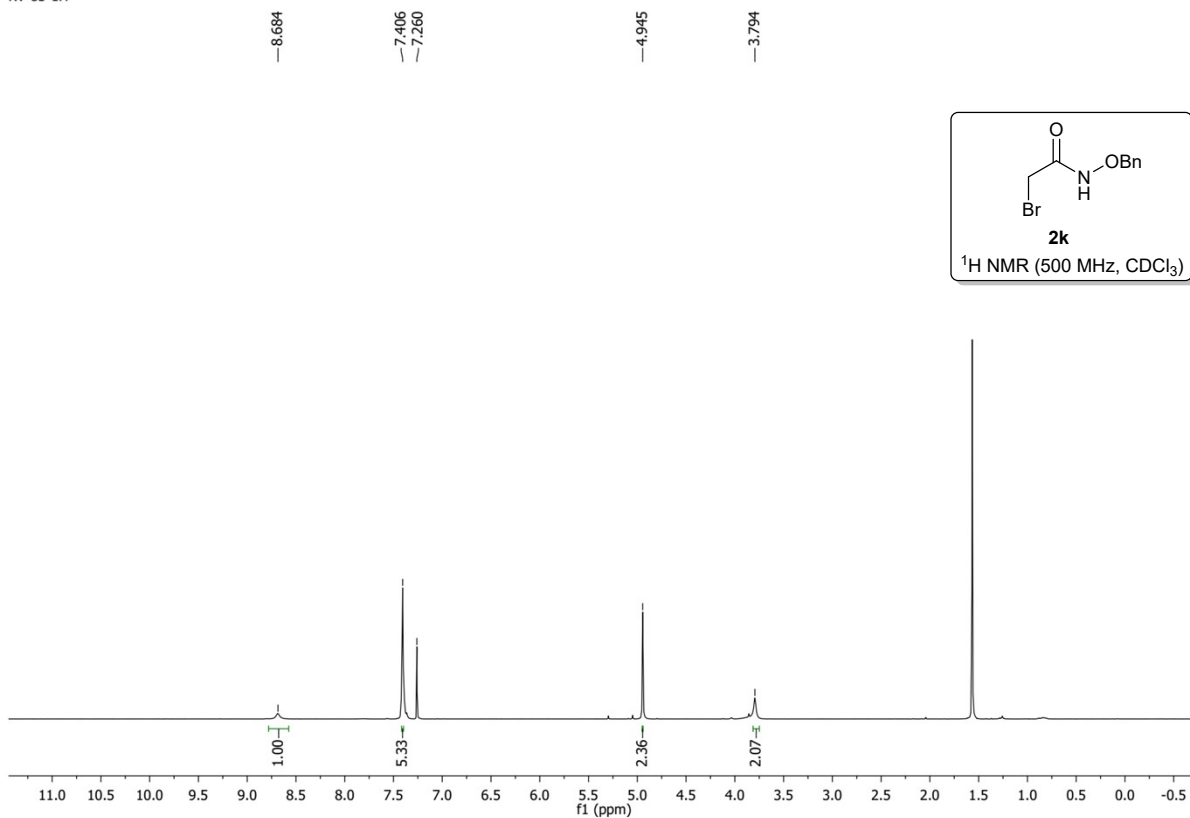

KV-388-1H

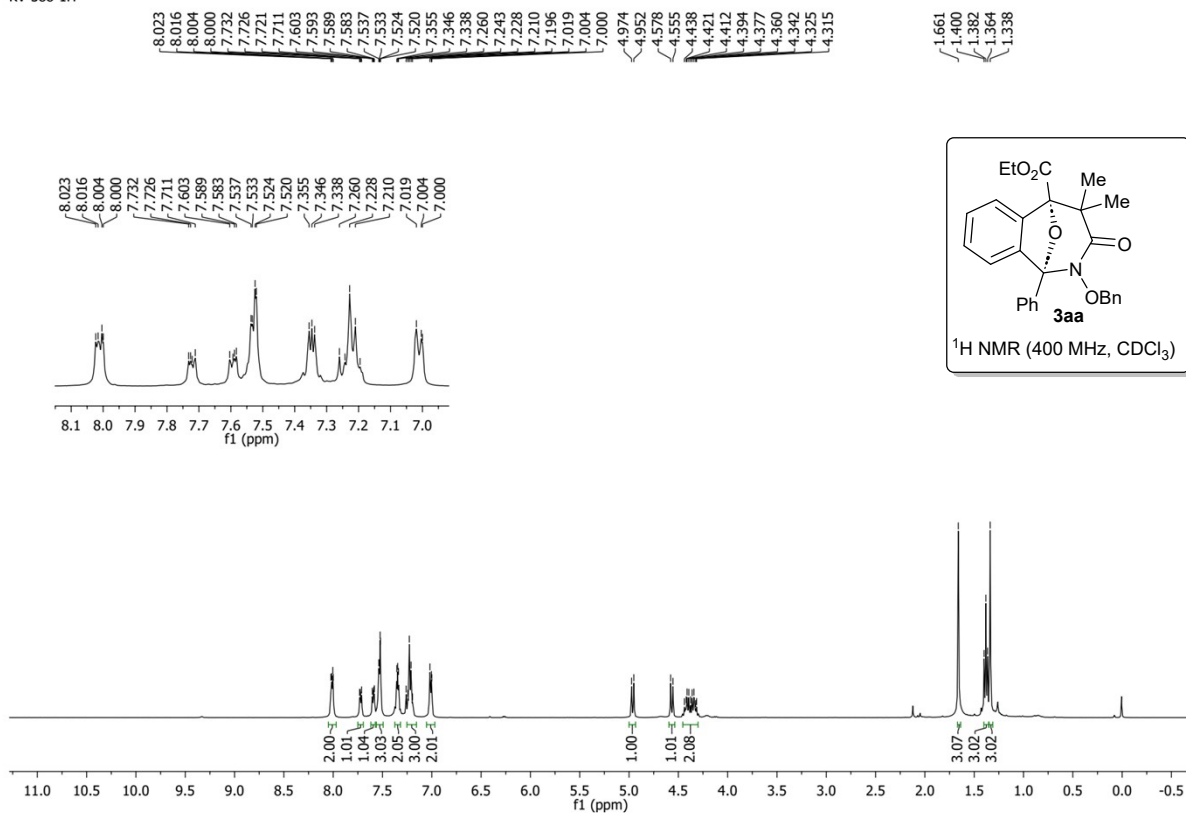

KV-388-13C

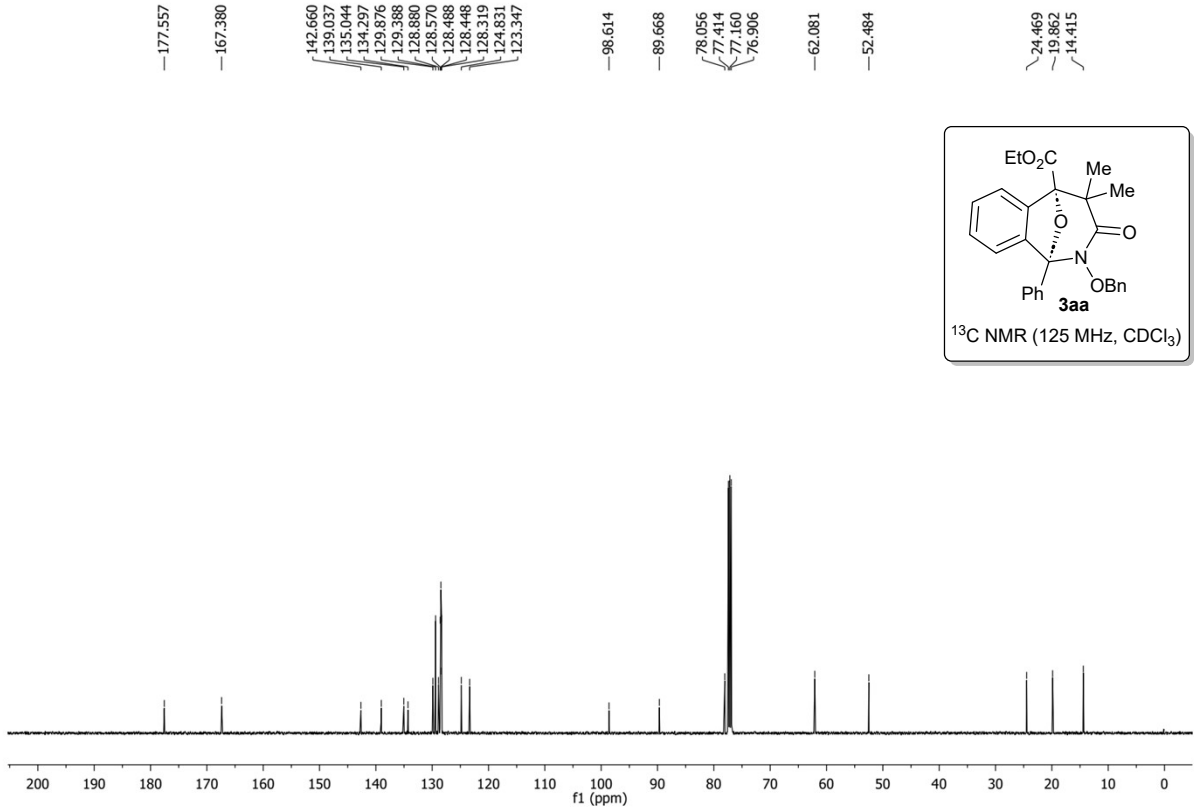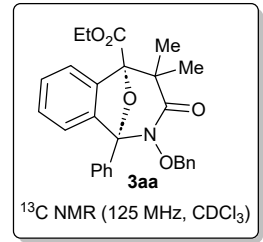

KV-442-1H

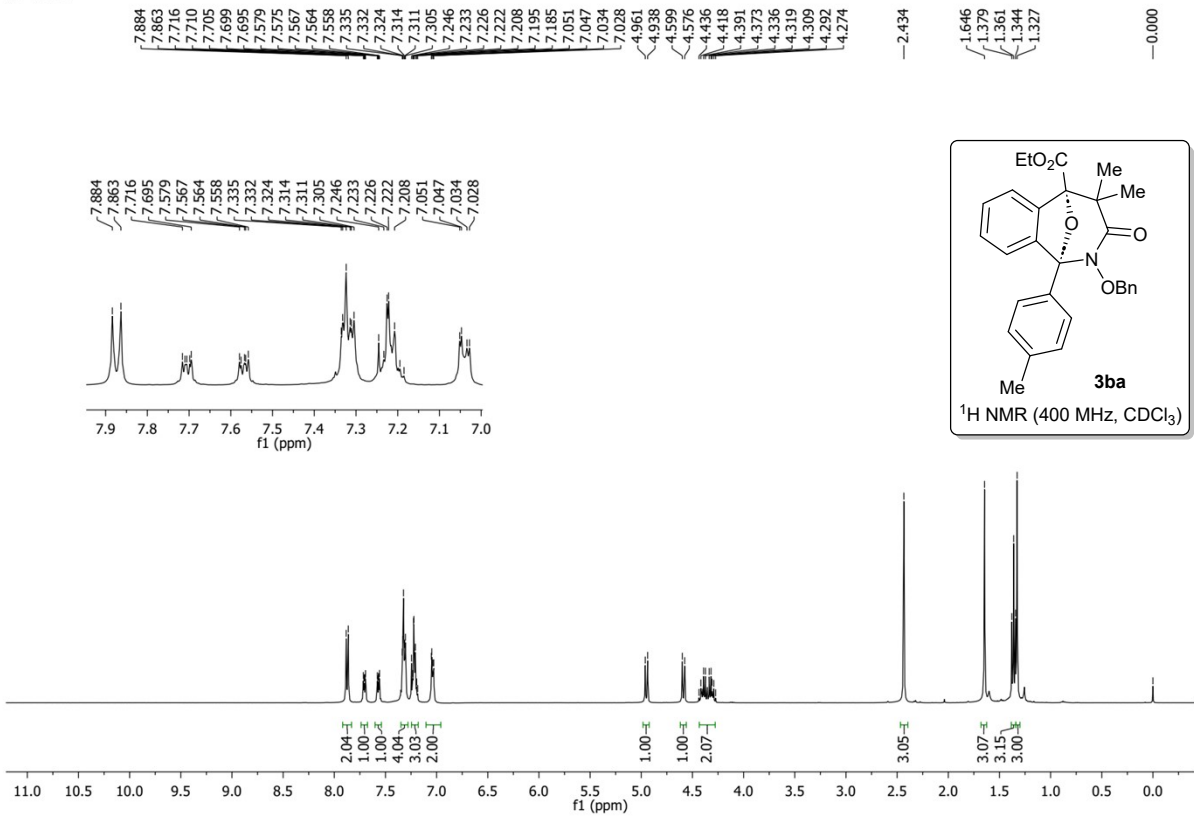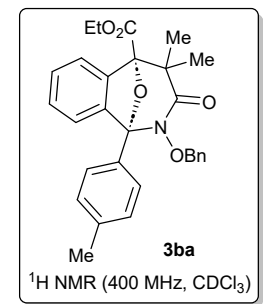

KV-442-13C

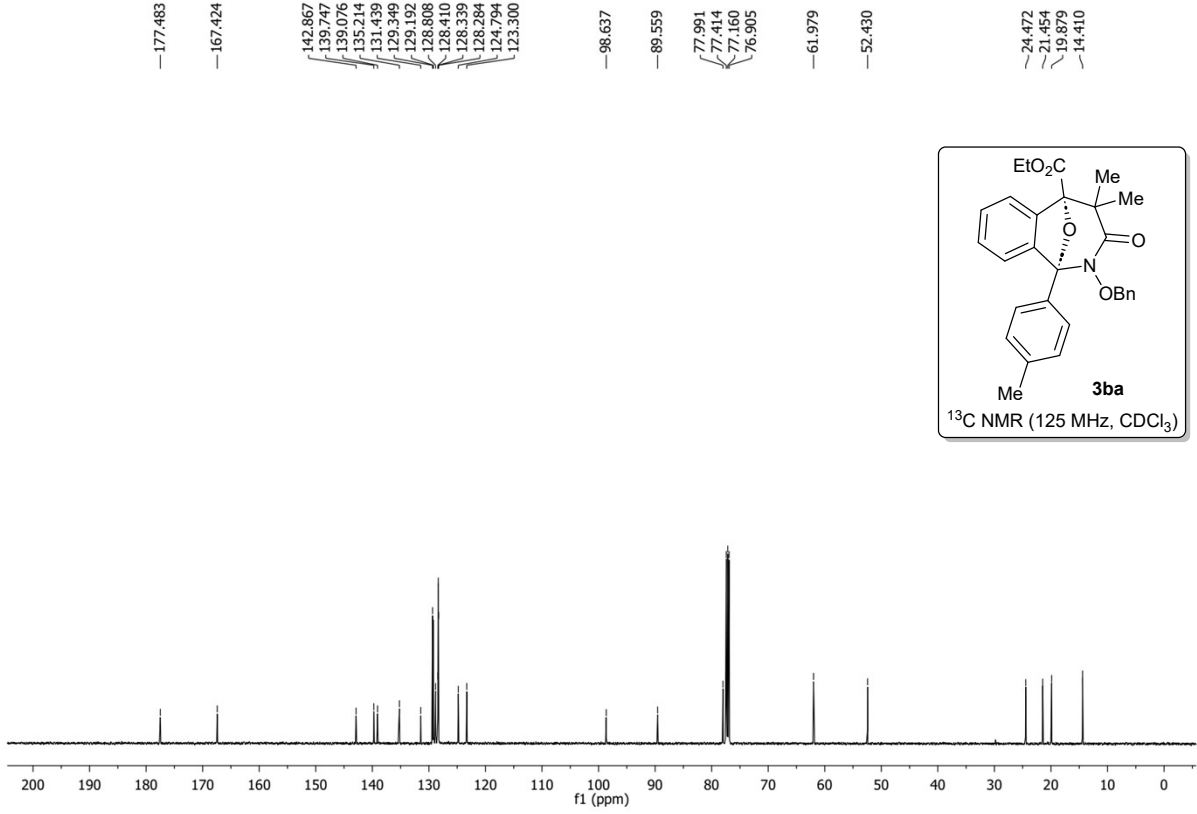

KV-422-1H

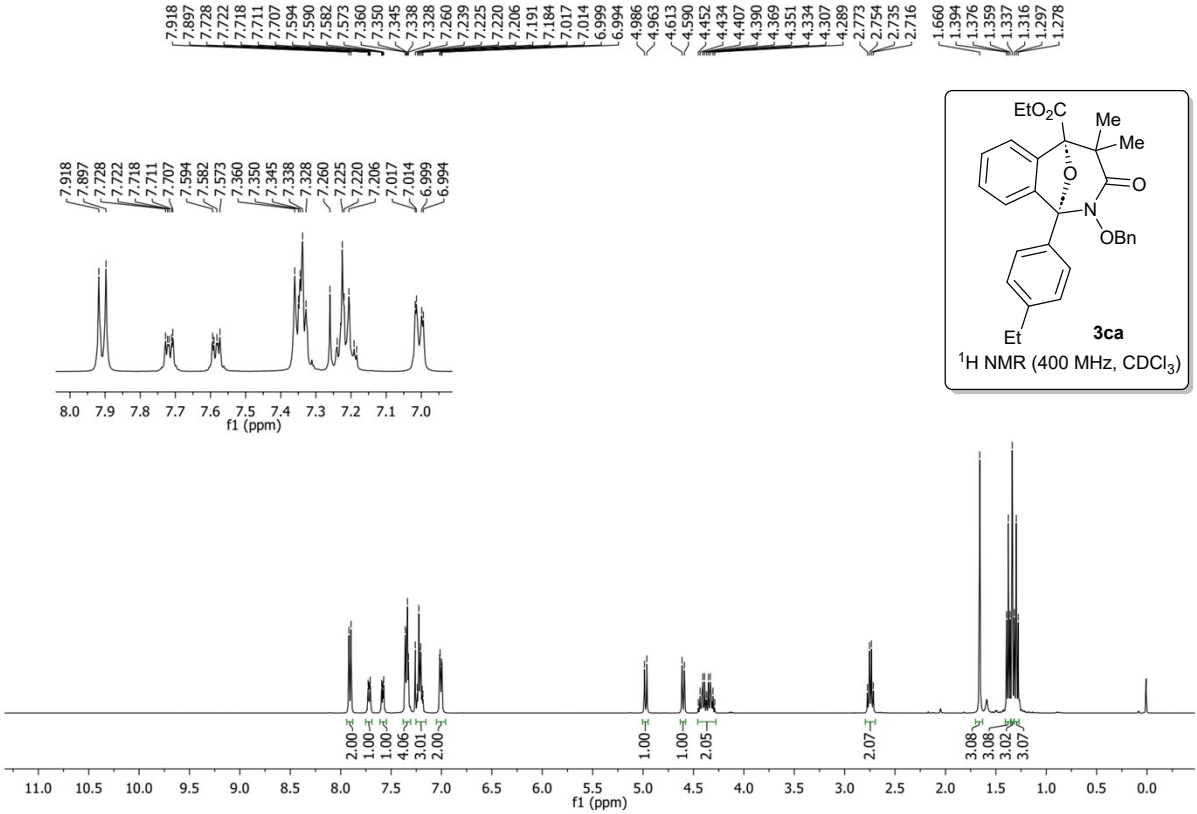

KV-422-13C

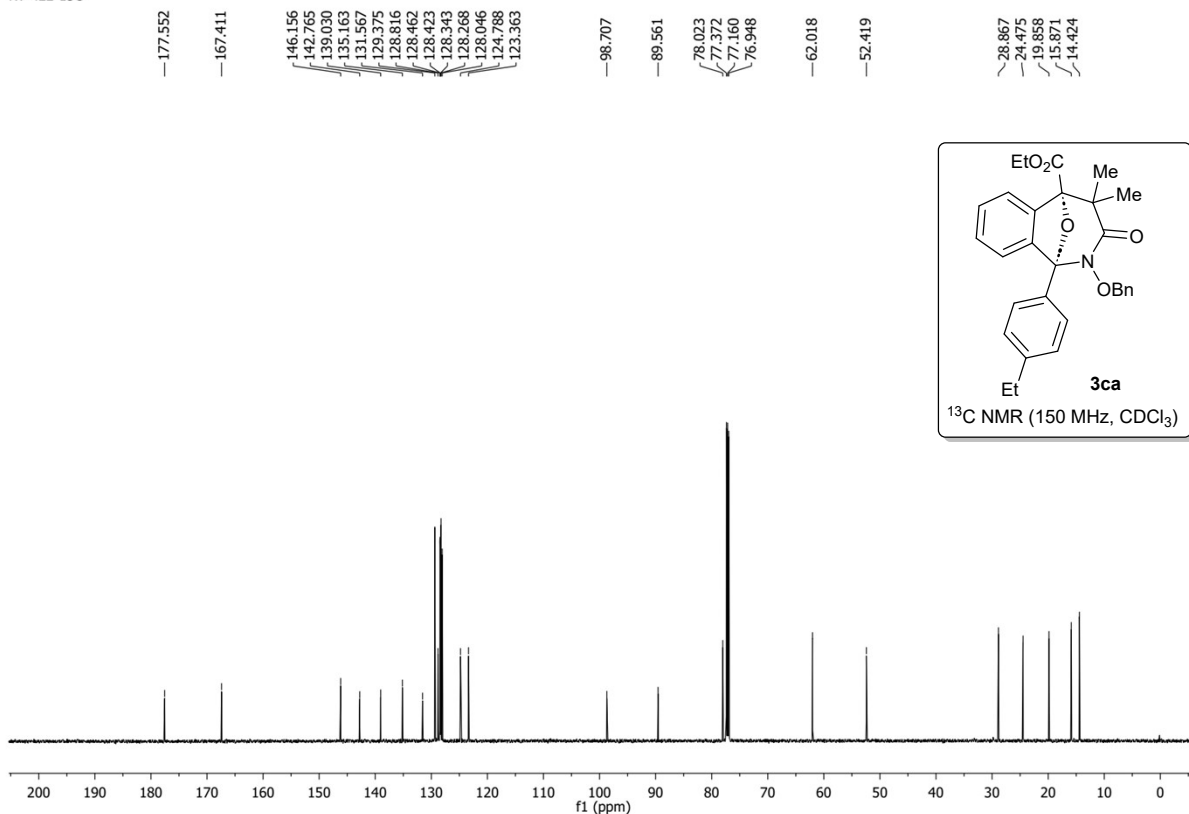

KV-432-1H

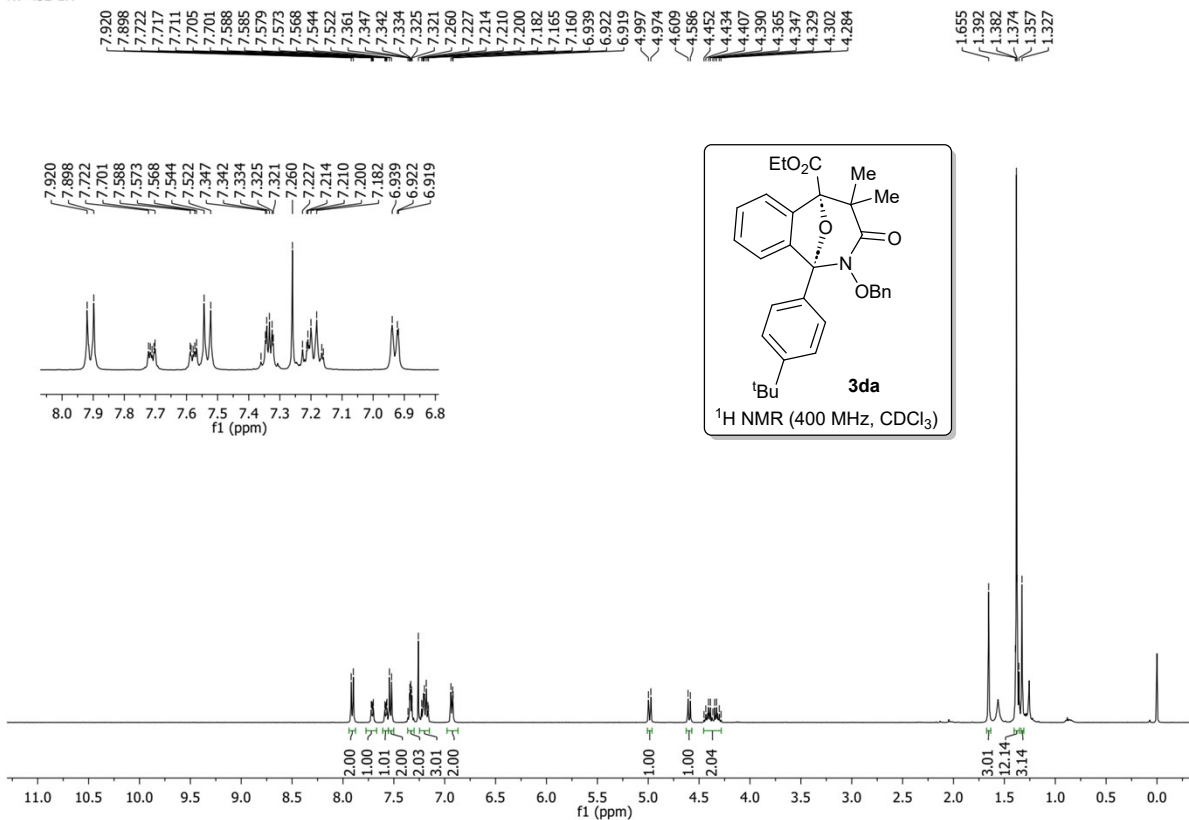

KV-432-13C

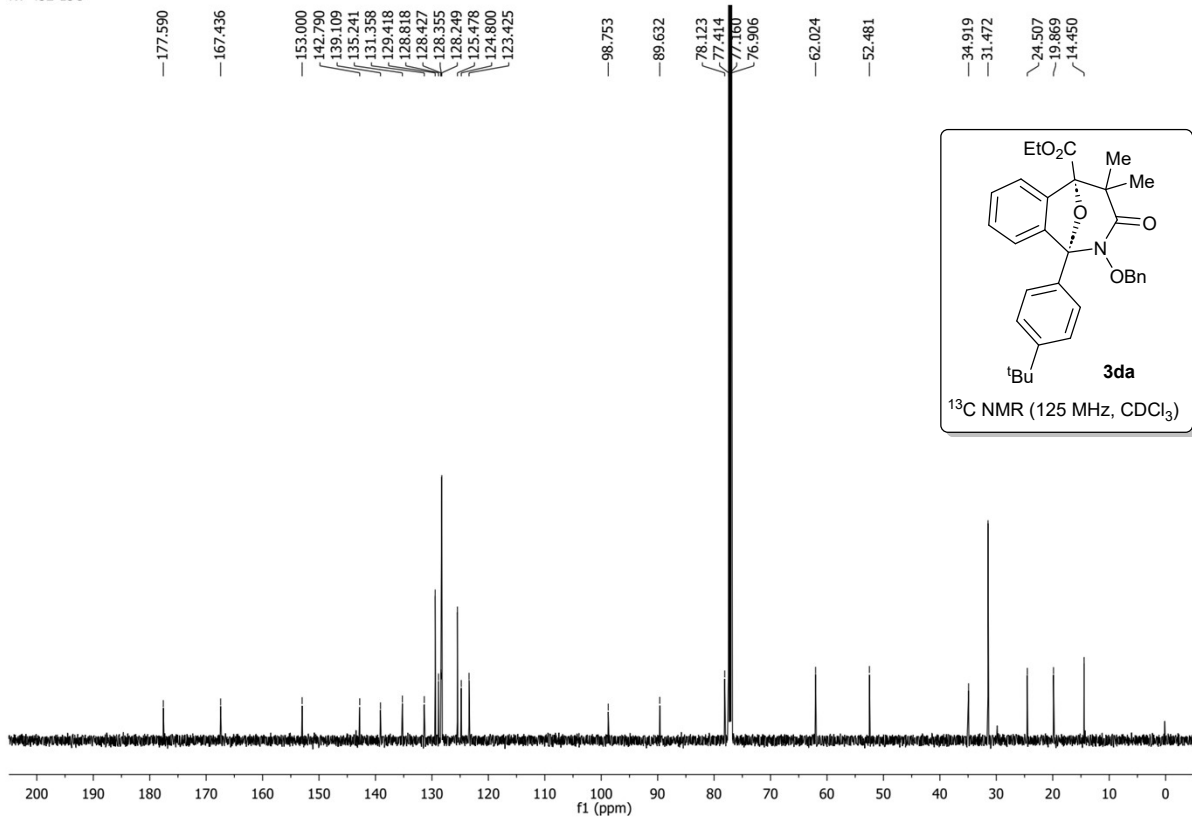

KV-415-1H

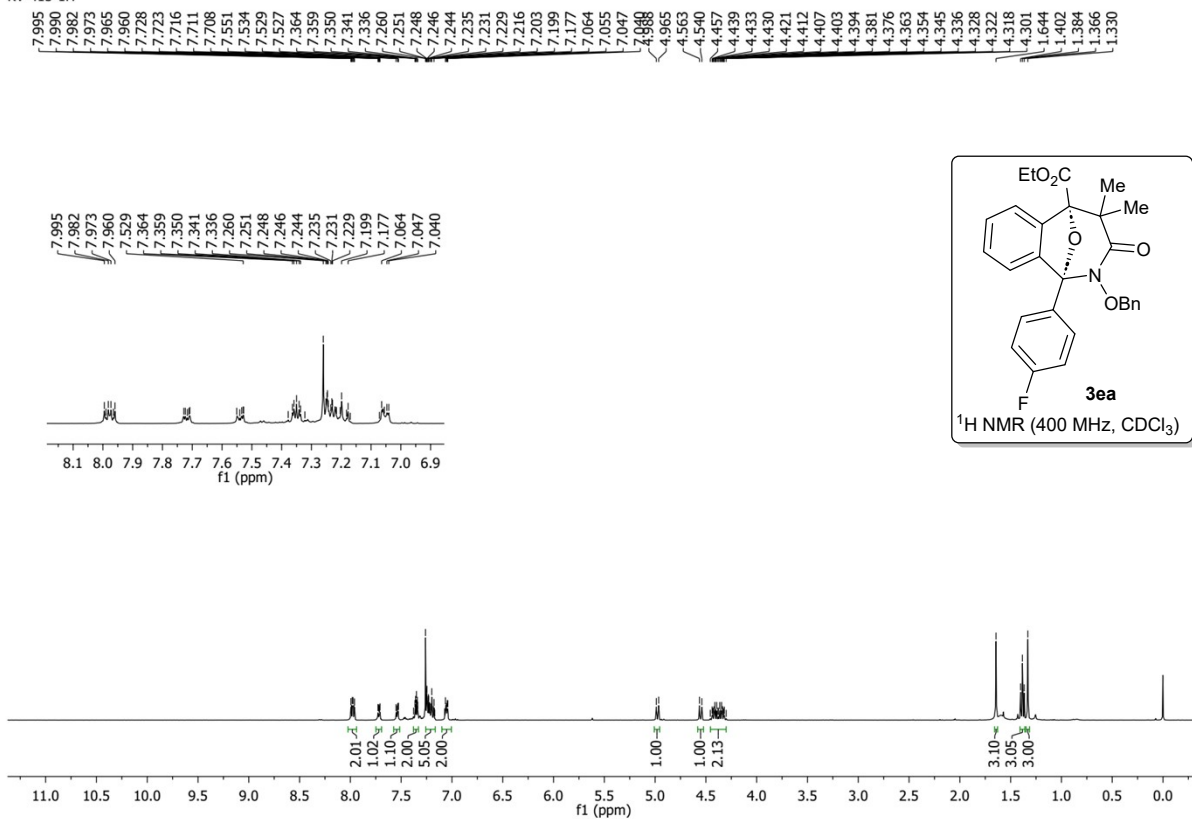



KV-415-13C

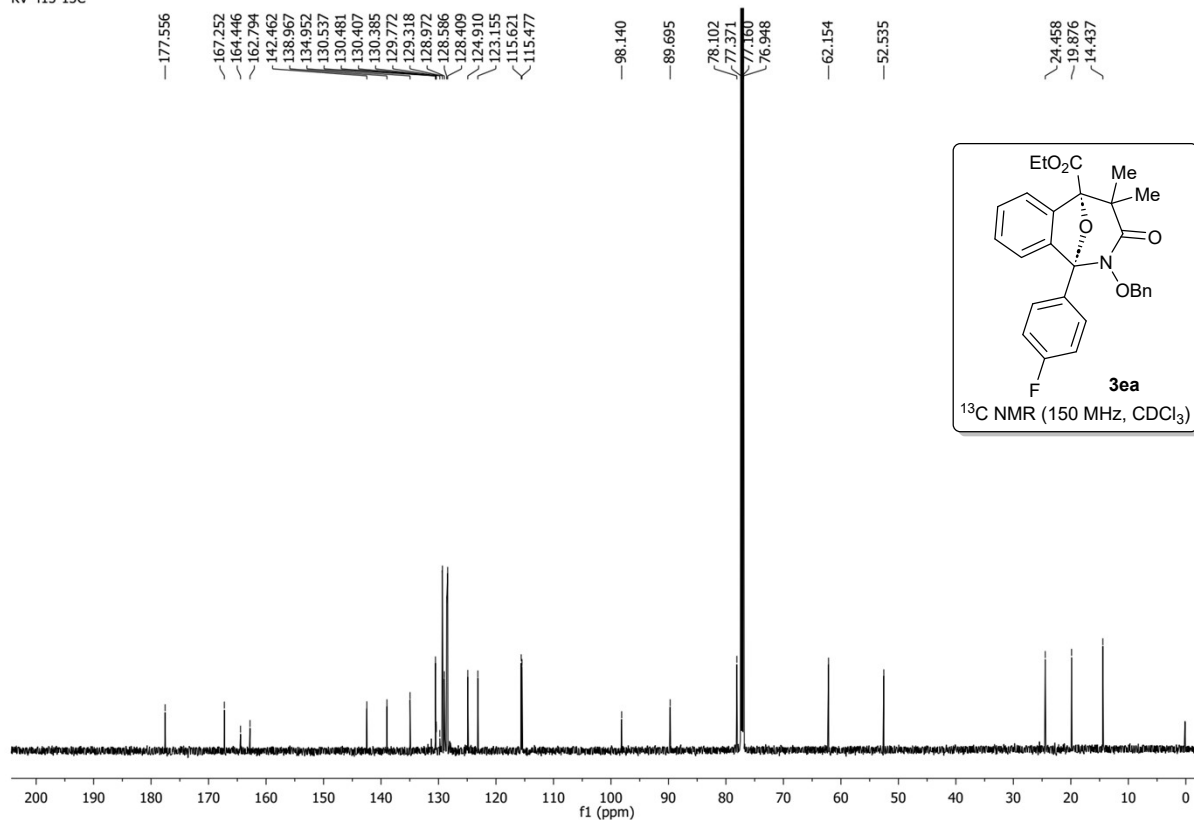

KV-415-19F

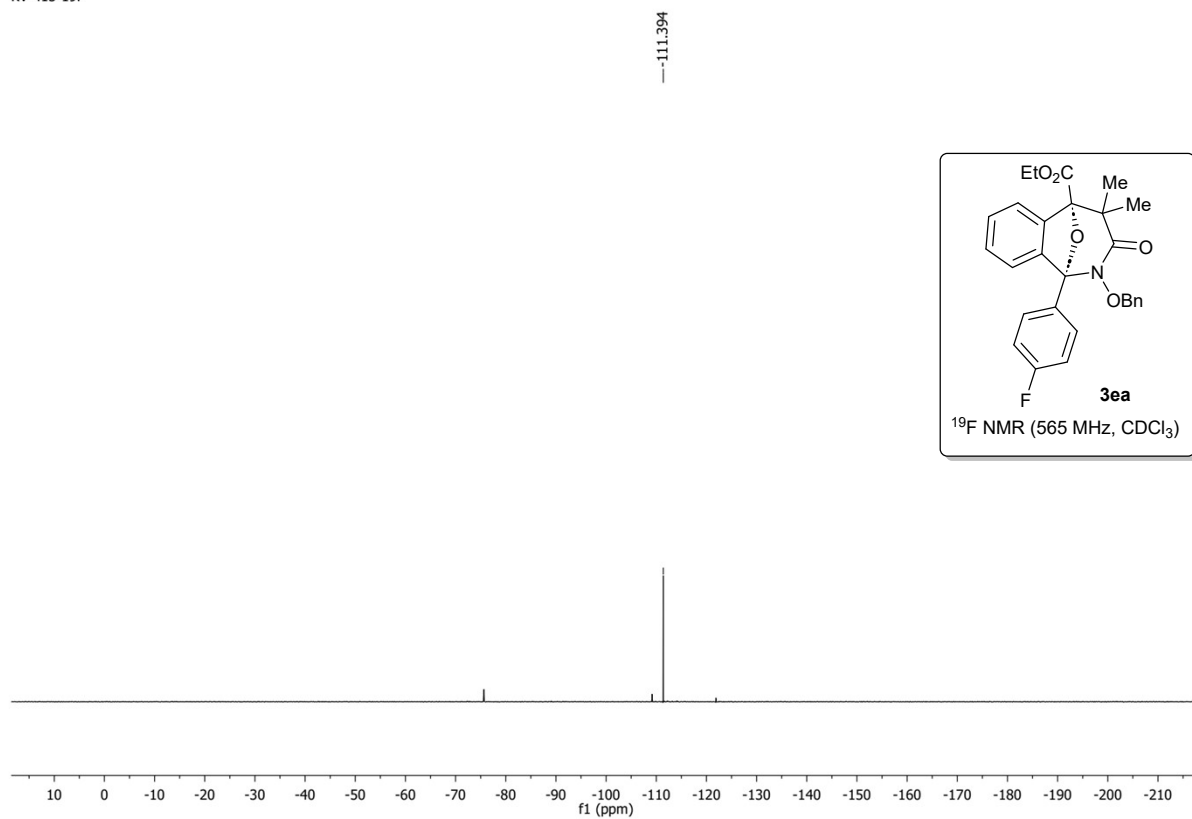

KV-408-1H

7.861  
7.844  
7.840  
7.725  
7.719  
7.710  
7.705  
7.702  
7.650  
7.643  
7.638  
7.627  
7.622  
7.622  
7.509  
7.526  
7.524  
7.522  
7.509  
7.504  
7.504  
7.502  
7.357  
7.353  
7.348  
7.342  
7.335  
7.335  
7.330  
7.327  
7.260  
7.252  
7.248  
7.238  
7.235  
7.233  
7.226  
7.222  
7.077  
7.073  
7.061  
4.985  
4.962  
4.573  
4.550  
4.428  
4.419  
4.410  
4.401  
4.383  
4.371  
4.365  
4.353  
4.335  
4.326  
4.318  
4.308

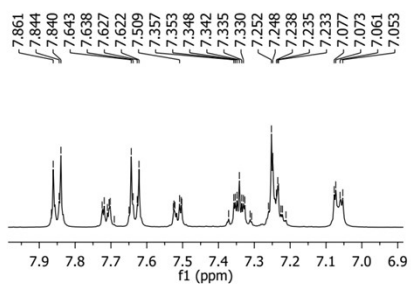

1.636  
1.391  
1.373  
1.355  
1.329

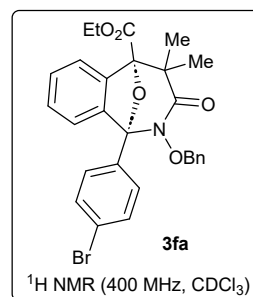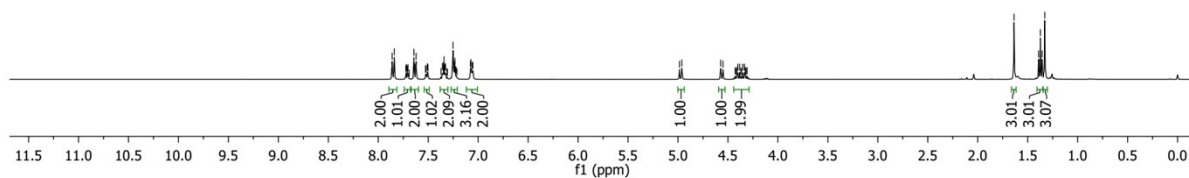

KV-408-13C

—177.543  
—167.170  
142.226  
138.926  
134.892  
133.433  
131.731  
130.119  
129.321  
128.975  
128.623  
128.585  
128.407  
124.900  
124.245  
123.055  
—98.067  
—89.720  
78.127  
77.371  
77.160  
76.948  
—62.139  
—52.561  
24.431  
19.899  
14.413

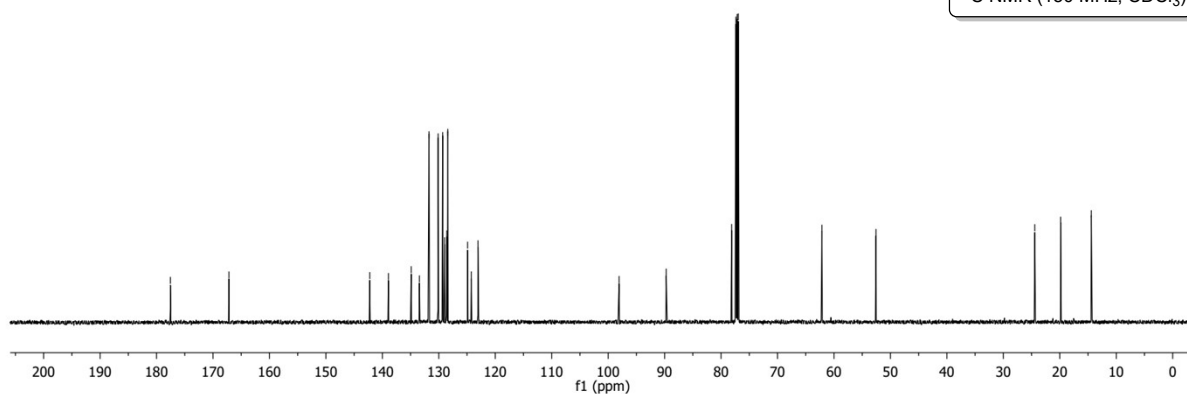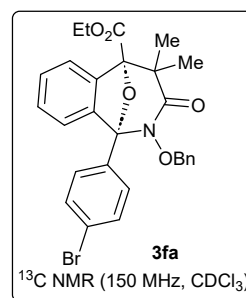

KV-407-1H

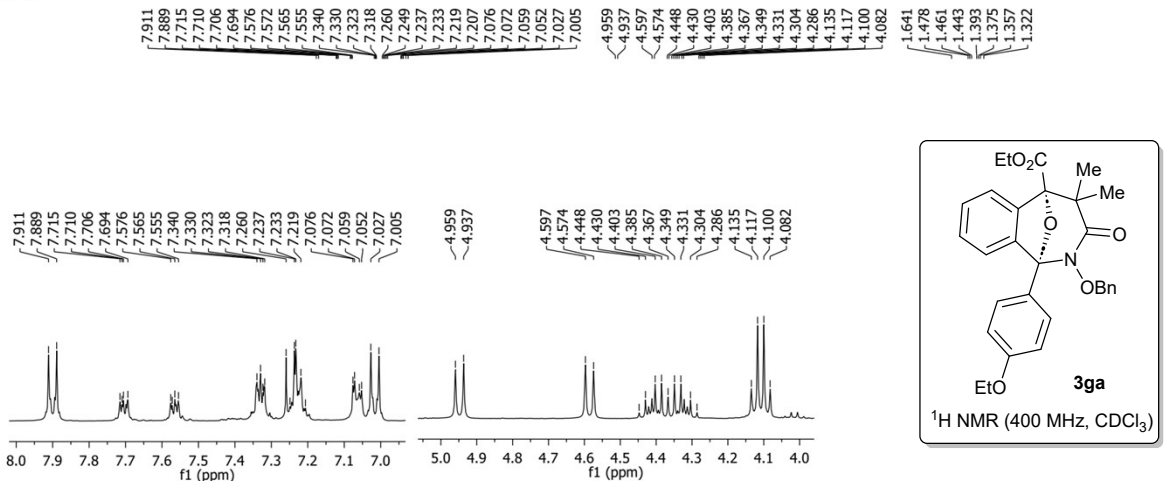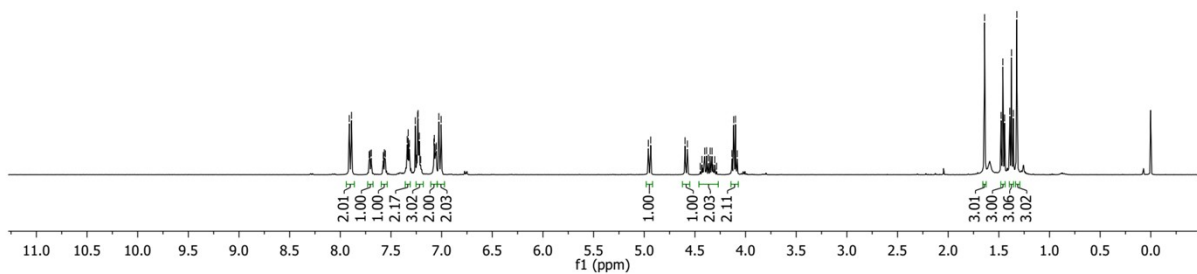

KV-407-13C

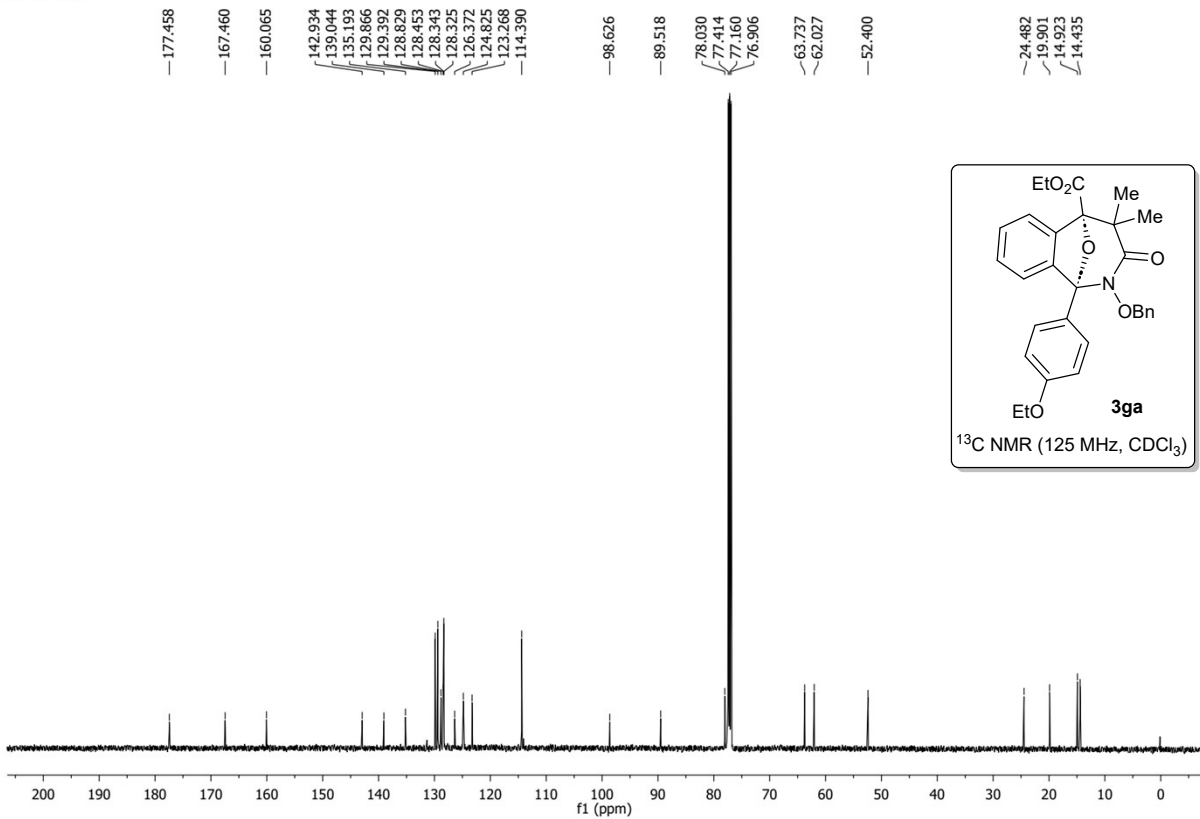

KV-431-1H

8.113  
8.093  
7.766  
7.746  
7.739  
7.731  
7.726  
7.723  
7.549  
7.546  
7.542  
7.534  
7.528  
7.404  
7.399  
7.385  
7.381  
7.377  
7.370  
7.363  
7.370  
7.363  
7.359  
7.355  
7.217  
7.217  
7.027  
7.340  
7.337  
7.260  
7.243  
7.239  
7.235  
7.235  
7.217  
7.201  
7.195  
7.027  
7.024  
7.009  
7.004  
7.004  
5.011  
4.987  
4.562  
4.539  
4.499  
4.442  
4.432  
4.415  
4.397  
4.367  
4.350  
4.323  
4.305

1.655  
1.403  
1.385  
1.367  
1.345

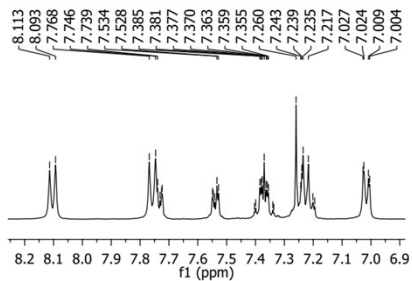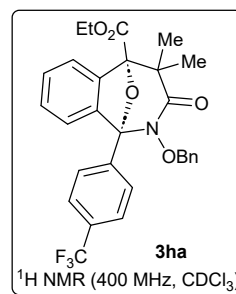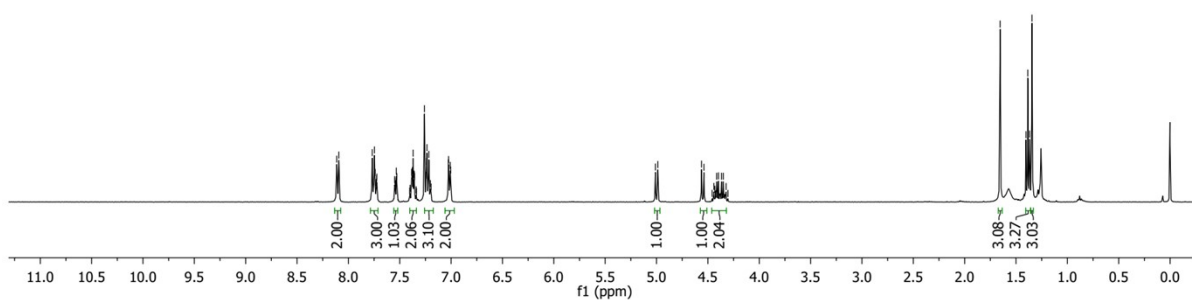

KV-431-13C

177.663  
167.095  
142.058  
138.957  
138.174  
134.817  
132.011  
131.794  
129.297  
129.079  
128.900  
128.783  
128.658  
128.431  
125.563  
125.539  
125.515  
125.491  
124.974  
124.922  
123.088  
97.852  
89.893  
78.217  
77.180  
77.372  
76.948  
62.223  
52.706

24.450  
19.857  
14.434

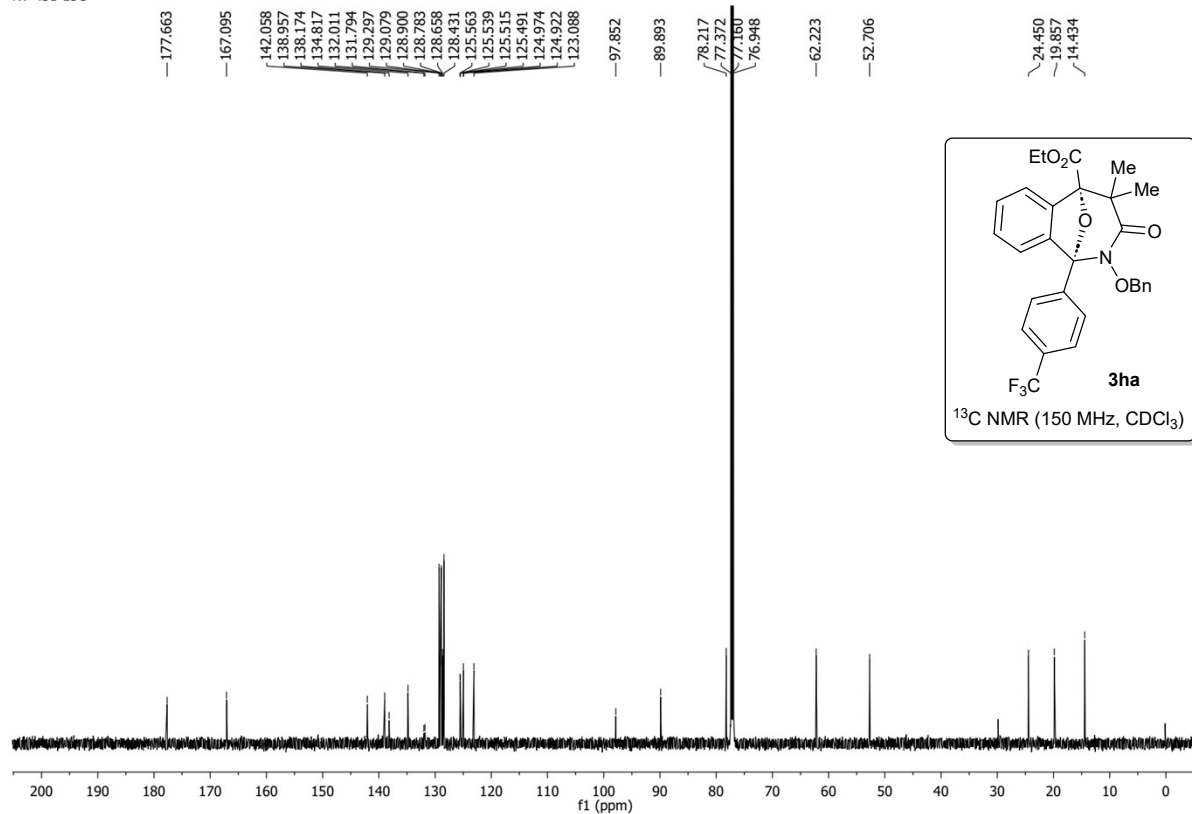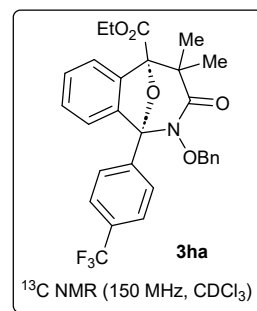

KV-431-19F

-62.676

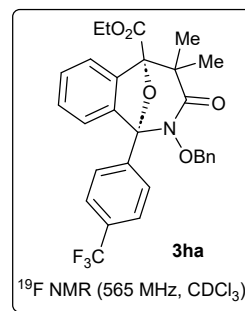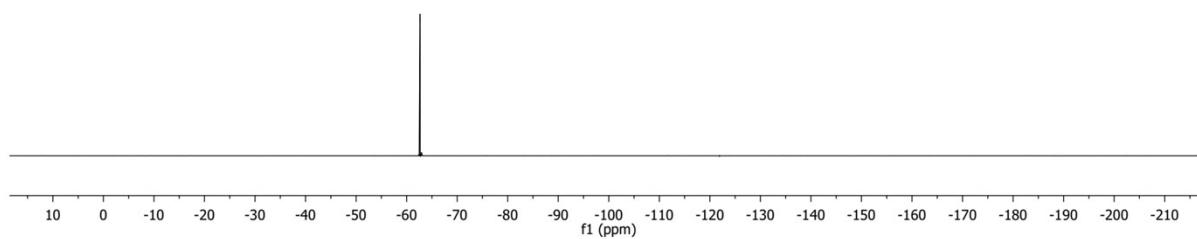

KV-476-1H

8.337  
8.315  
8.162  
8.140  
7.753  
7.748  
7.739  
7.734  
7.732  
7.556  
7.399  
7.394  
7.388  
7.521  
7.381  
7.376  
7.403  
7.372  
7.260  
7.394  
7.388  
7.251  
7.381  
7.246  
7.227  
7.070  
7.067  
7.051  
7.047  
5.022  
4.998  
4.556  
4.532  
4.444  
4.435  
4.427  
4.417  
4.400  
4.375  
4.357  
4.348  
4.340  
4.330

1.654  
1.408  
1.390  
1.372  
1.350

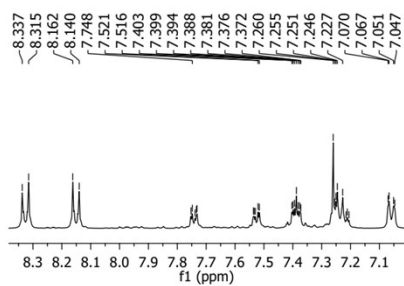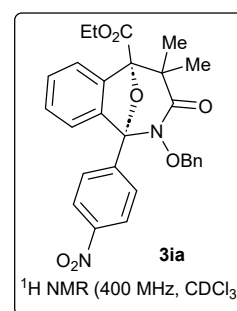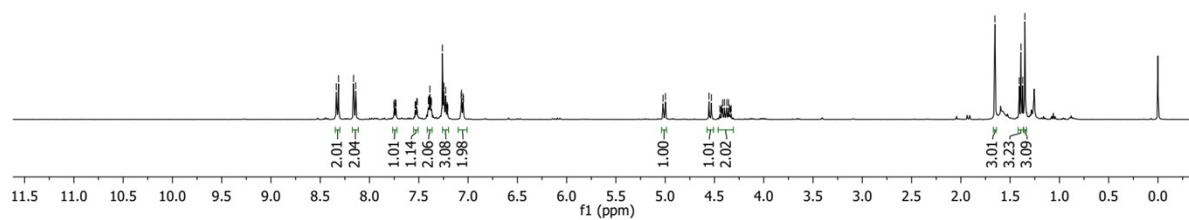

KV-476-13C

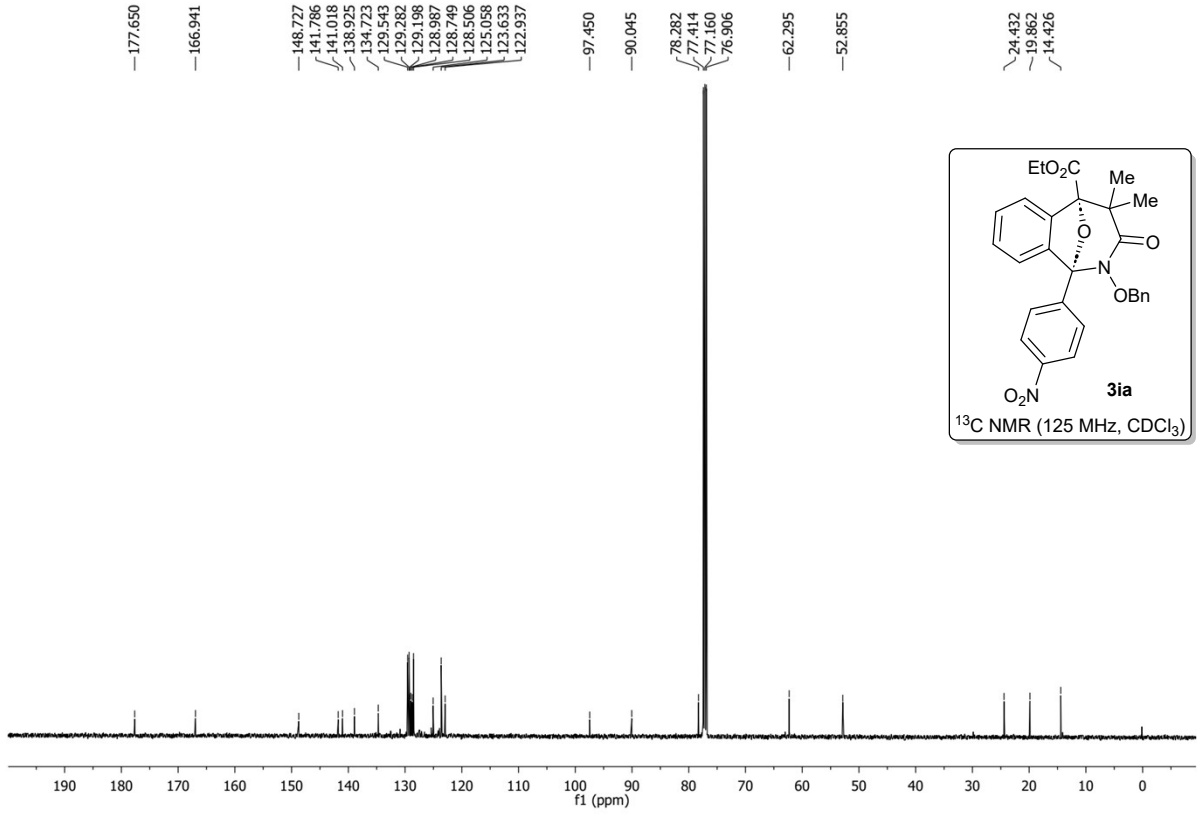

KV-504-1H

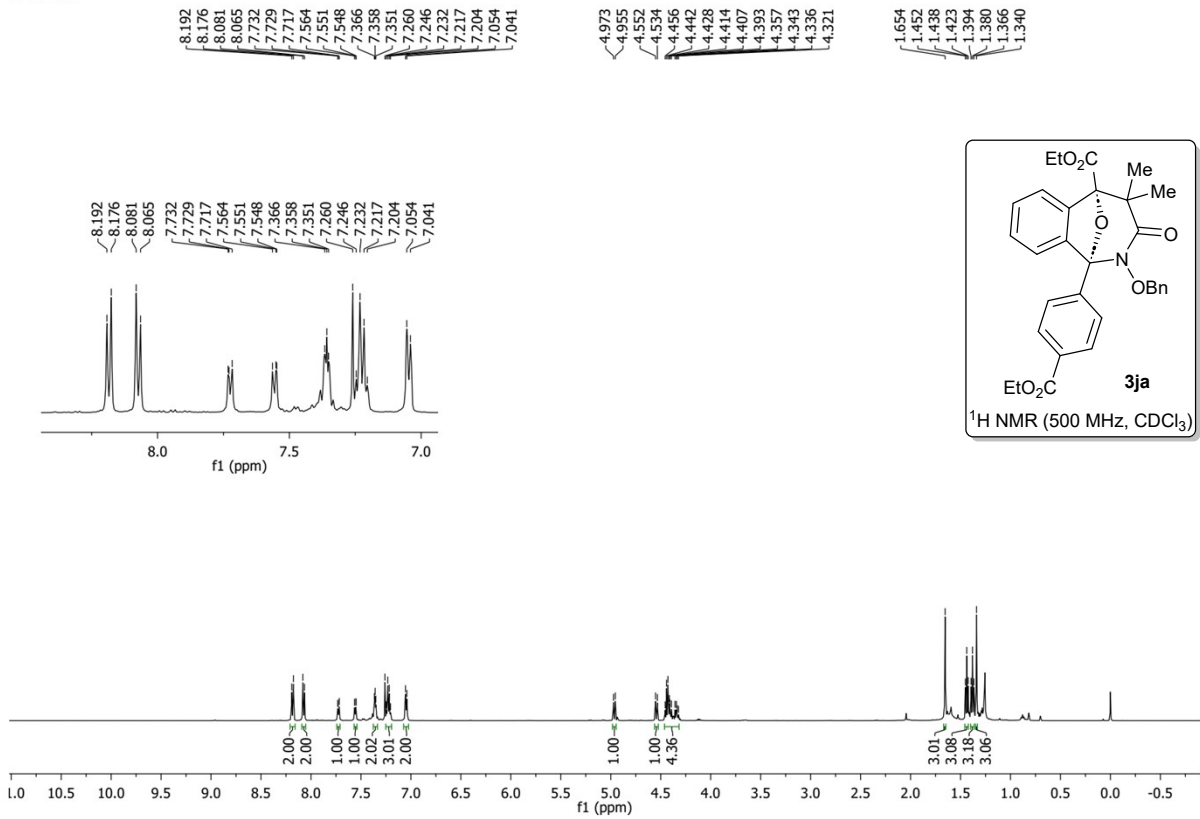

KV-504-13C

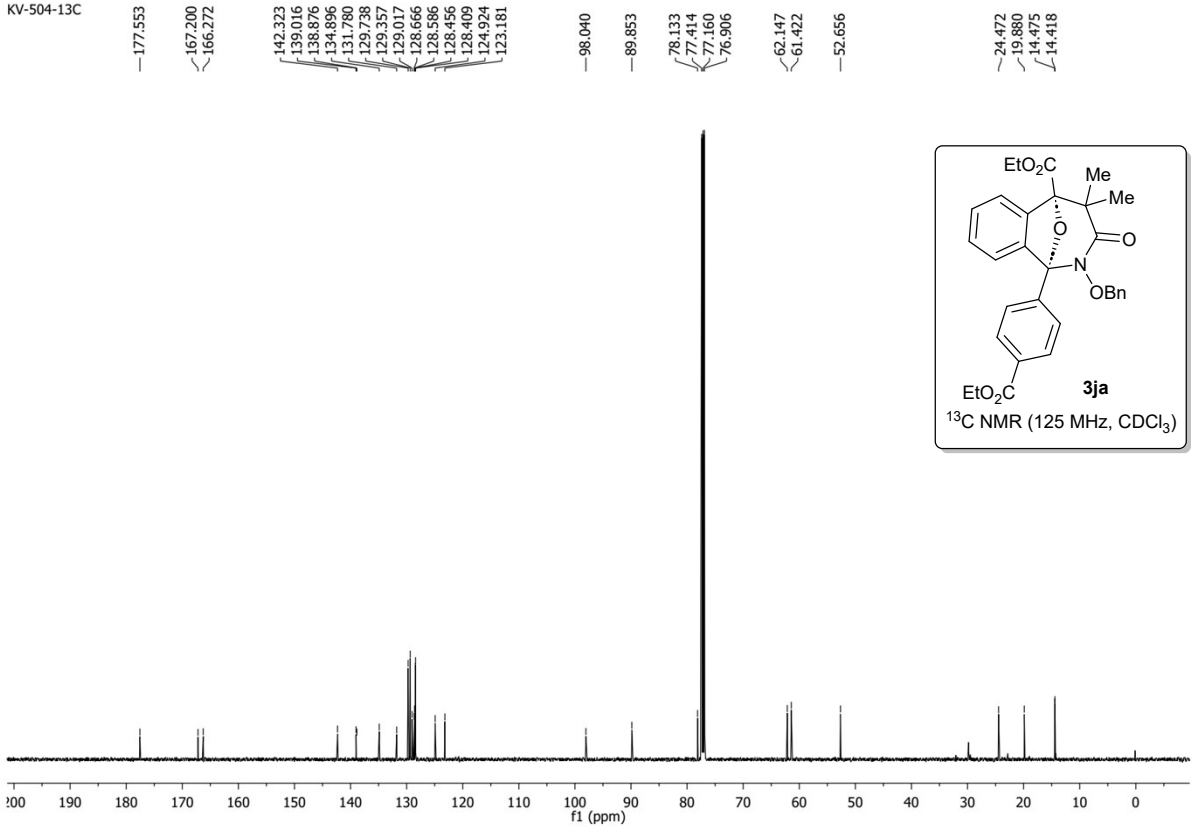

KV-449-1H

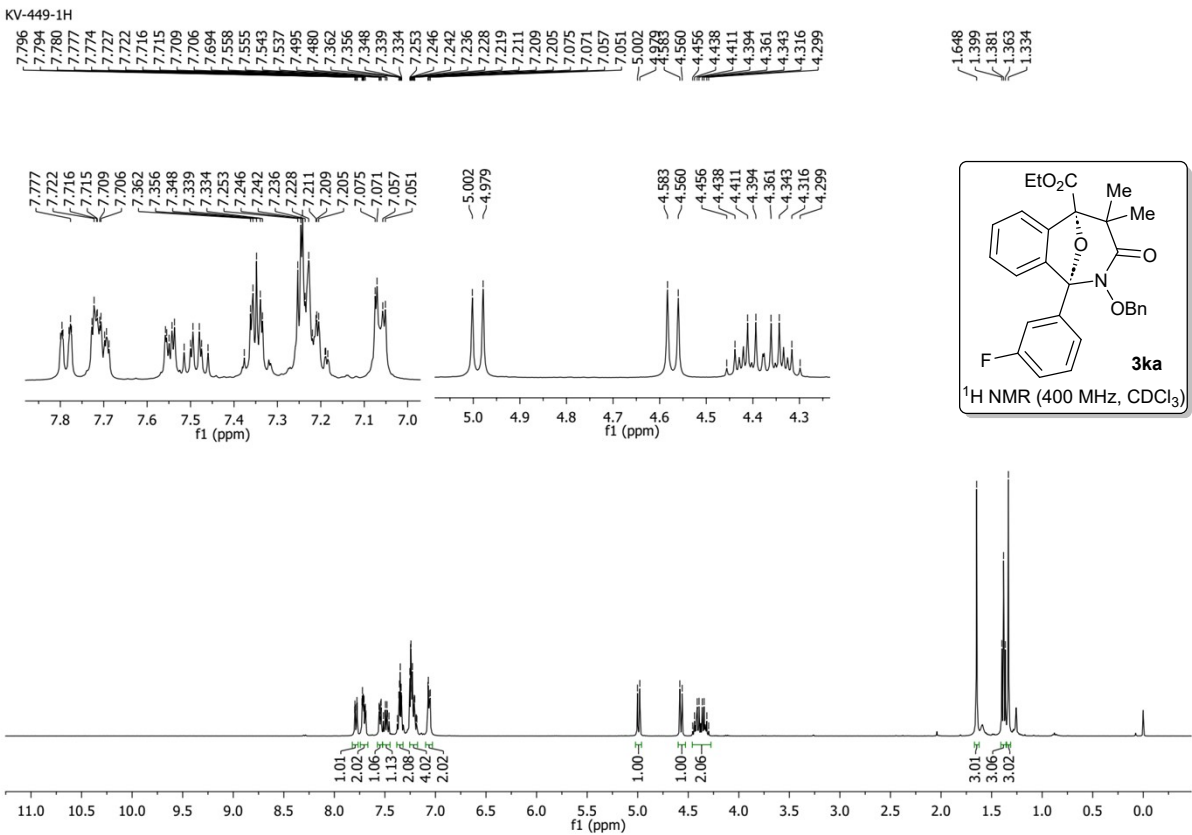

KV-449-13C

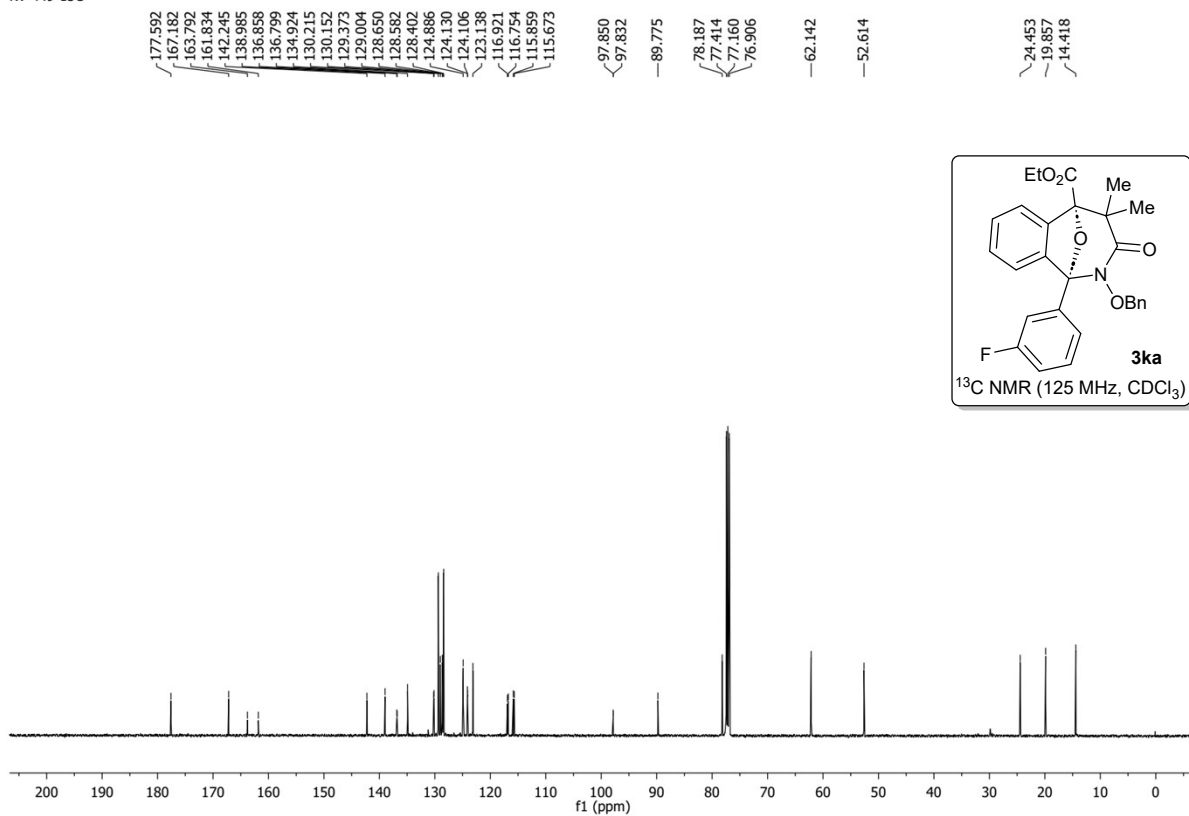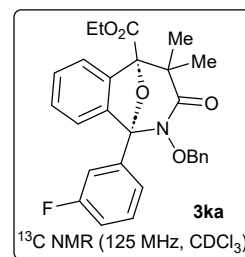

KV-449-19F

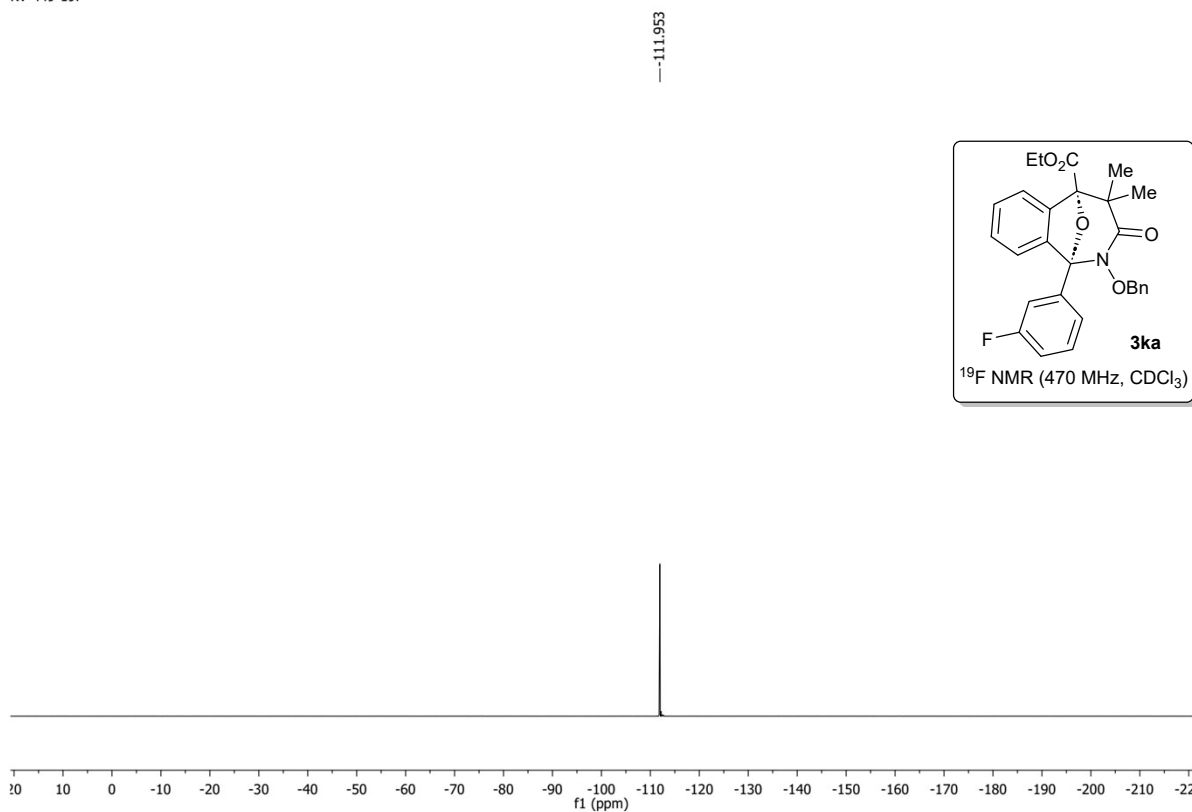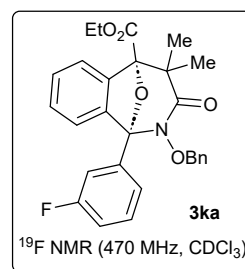



KV-469-1H

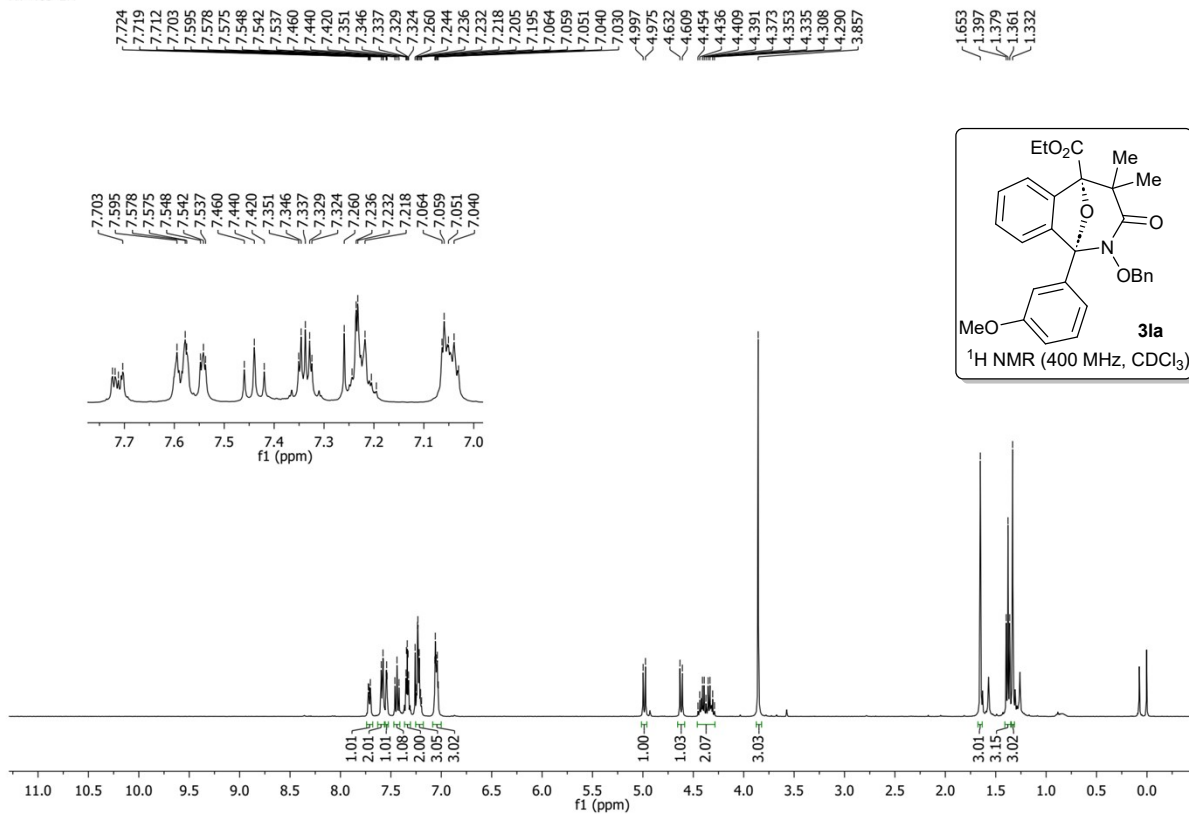

KV-469-13C

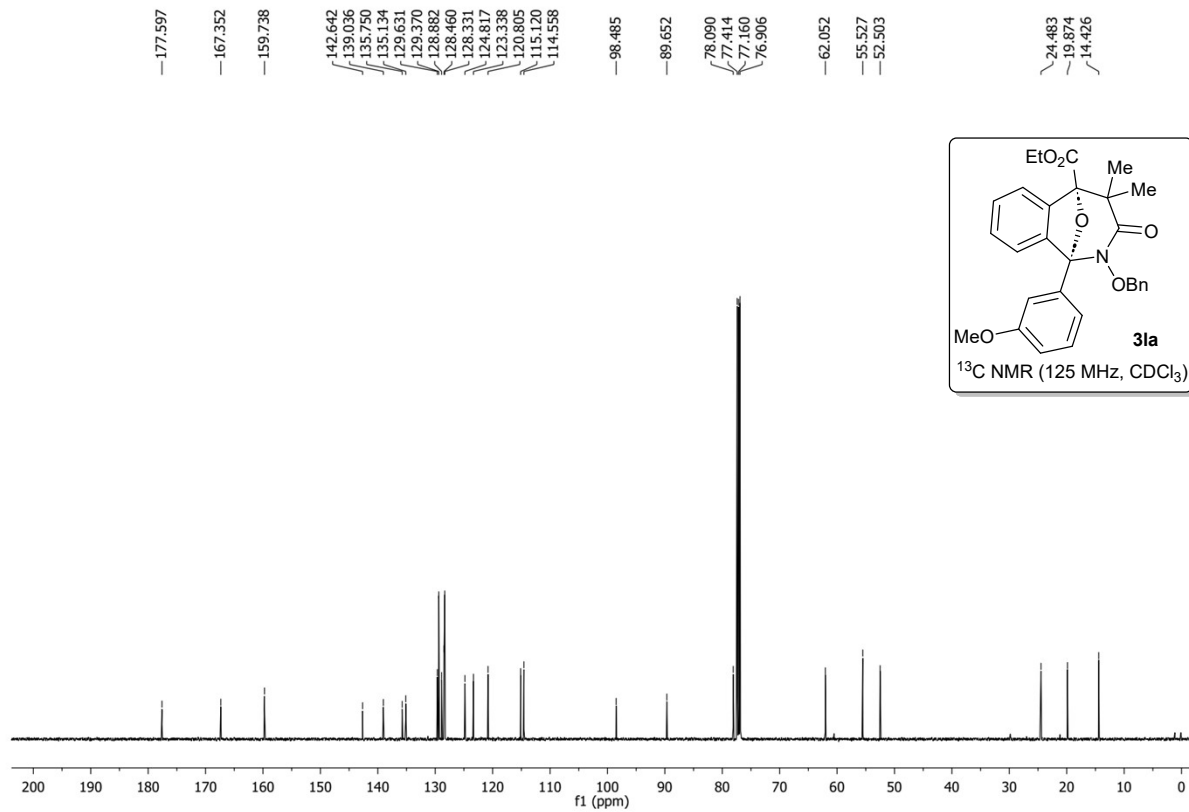

KV-441-1H

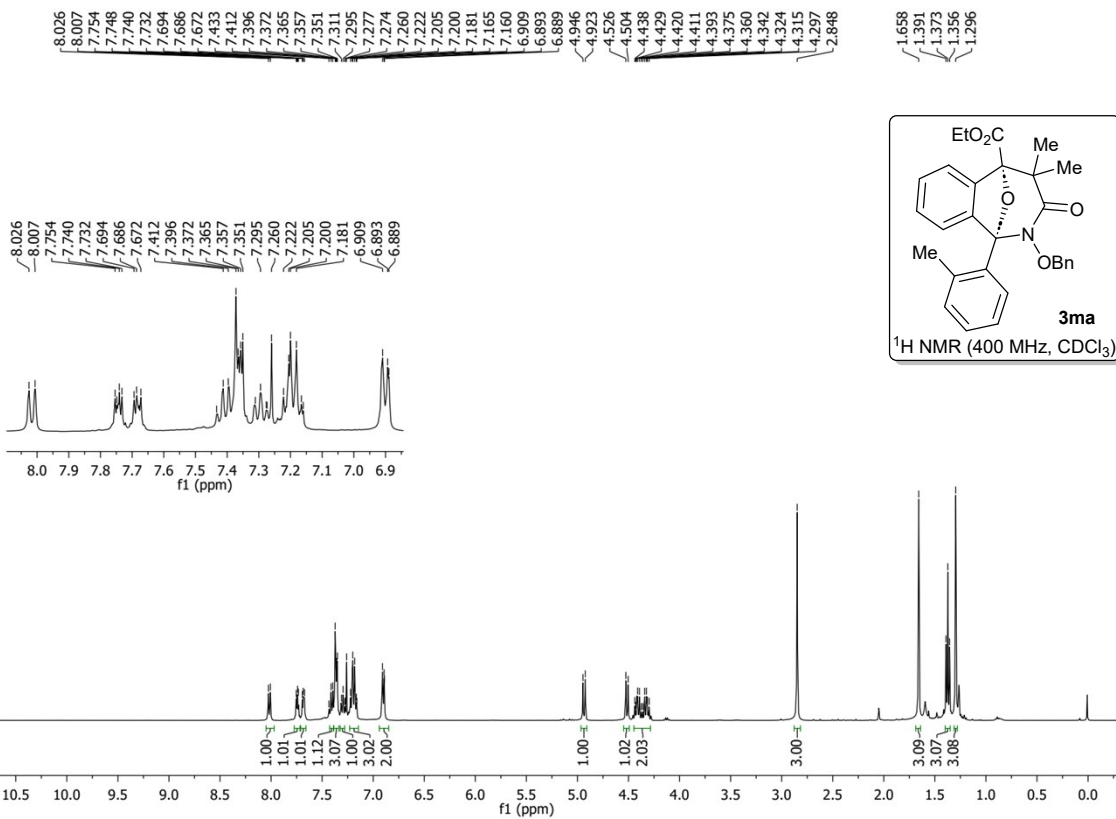

KV-441-13C

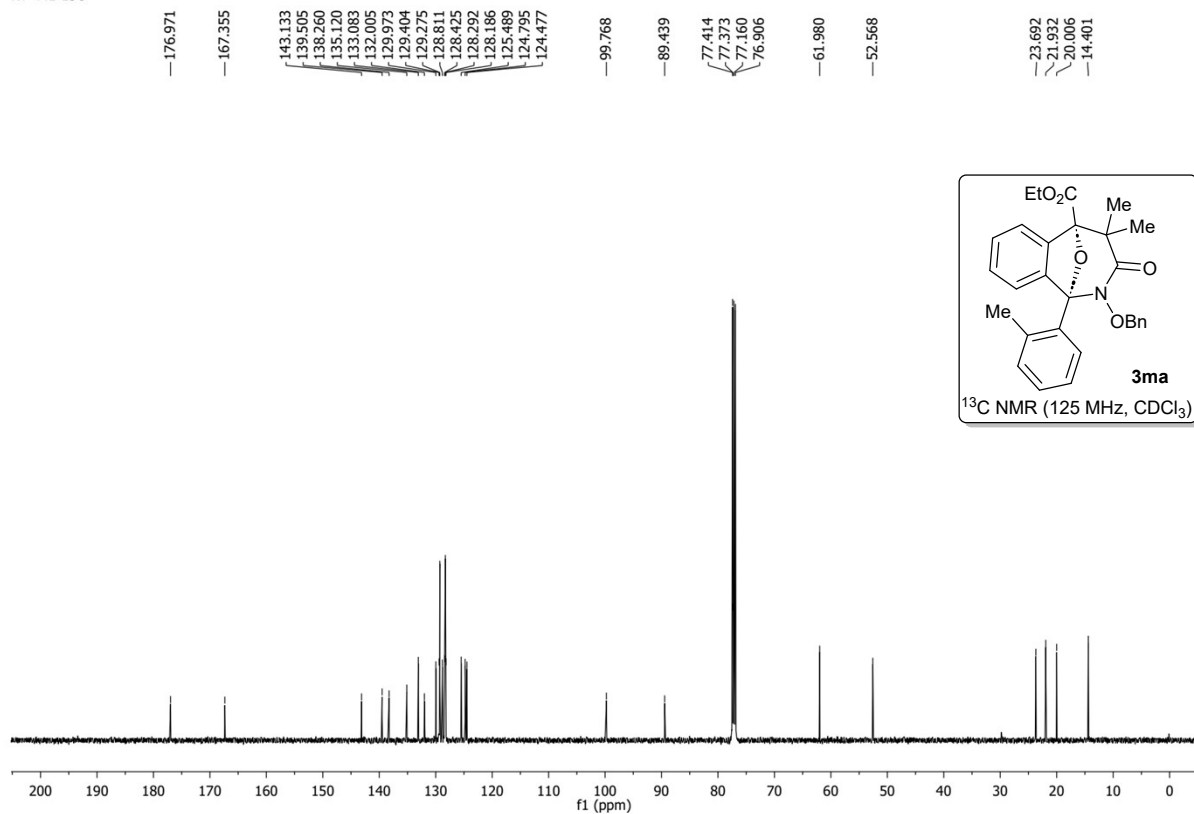

KV-450-1H

8.429, 8.424, 8.407, 7.980, 7.974, 7.962, 7.956, 7.753, 7.747, 7.740, 7.734, 7.731, 7.731, 7.681, 7.676, 7.672, 7.667, 7.662, 7.654, 7.650, 7.644, 7.644, 7.364, 7.359, 7.350, 7.342, 7.340, 7.260, 7.236, 7.234, 7.228, 7.223, 7.219, 7.216, 7.205, 7.202, 7.198, 7.183, 7.176, 6.987, 6.983, 6.968, 6.963, 4.967, 4.943, 4.943, 4.448, 4.437, 4.430, 4.419, 4.412, 4.403, 4.395, 4.385, 4.367, 4.344, 4.326, 4.317, 4.308, 4.299, 4.291, 4.281, 4.275, 4.264, 4.258, 1.640, 1.384, 1.366, 1.349, 1.293

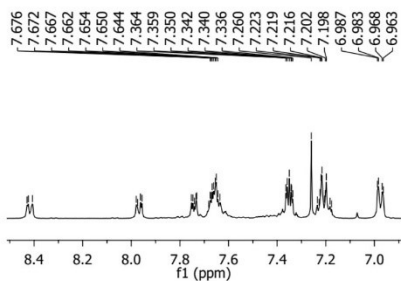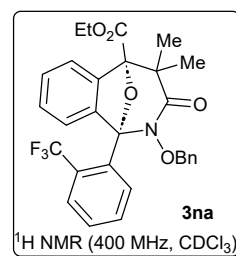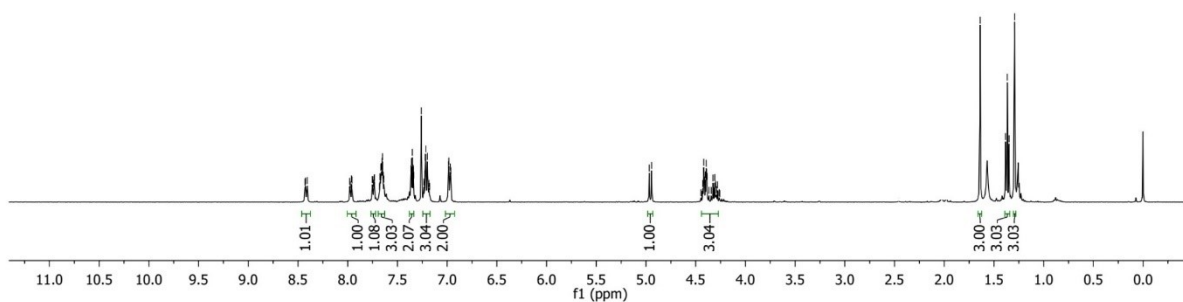

KV-450-13C

176.361, 167.255, 143.627, 138.130, 135.062, 131.380, 131.175, 130.536, 130.276, 130.135, 129.494, 129.440, 129.386, 129.331, 129.195, 128.776, 128.713, 128.476, 128.397, 128.355, 128.180, 125.086, 124.754, 123.902, 122.903, 98.058, 89.821, 77.843, 77.414, 77.160, 76.906, 62.013, 52.741, 23.630, 20.273, 14.250

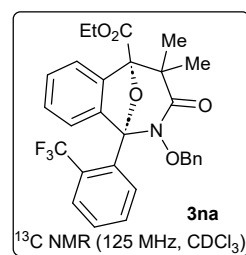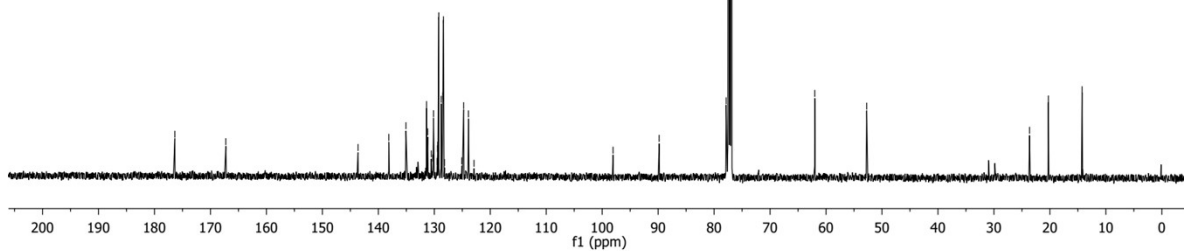

KV-450-19F

—54.164

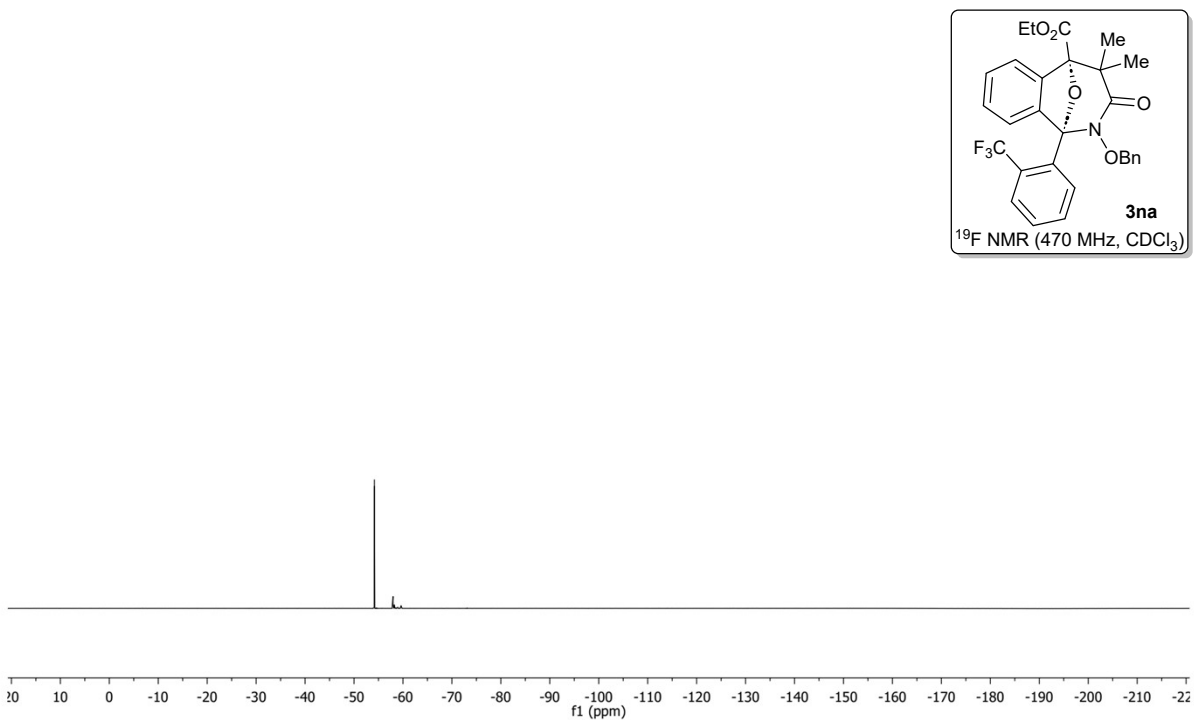

KV-416-1H

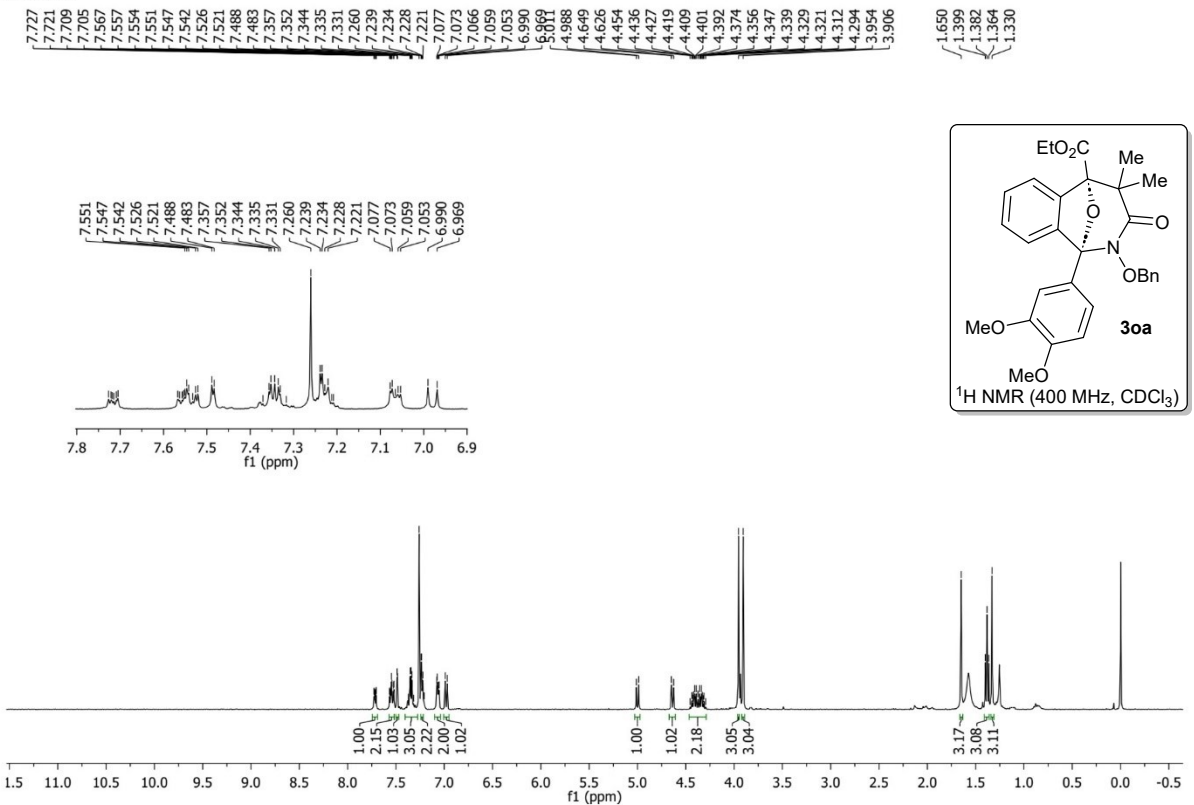

KV-416-13C

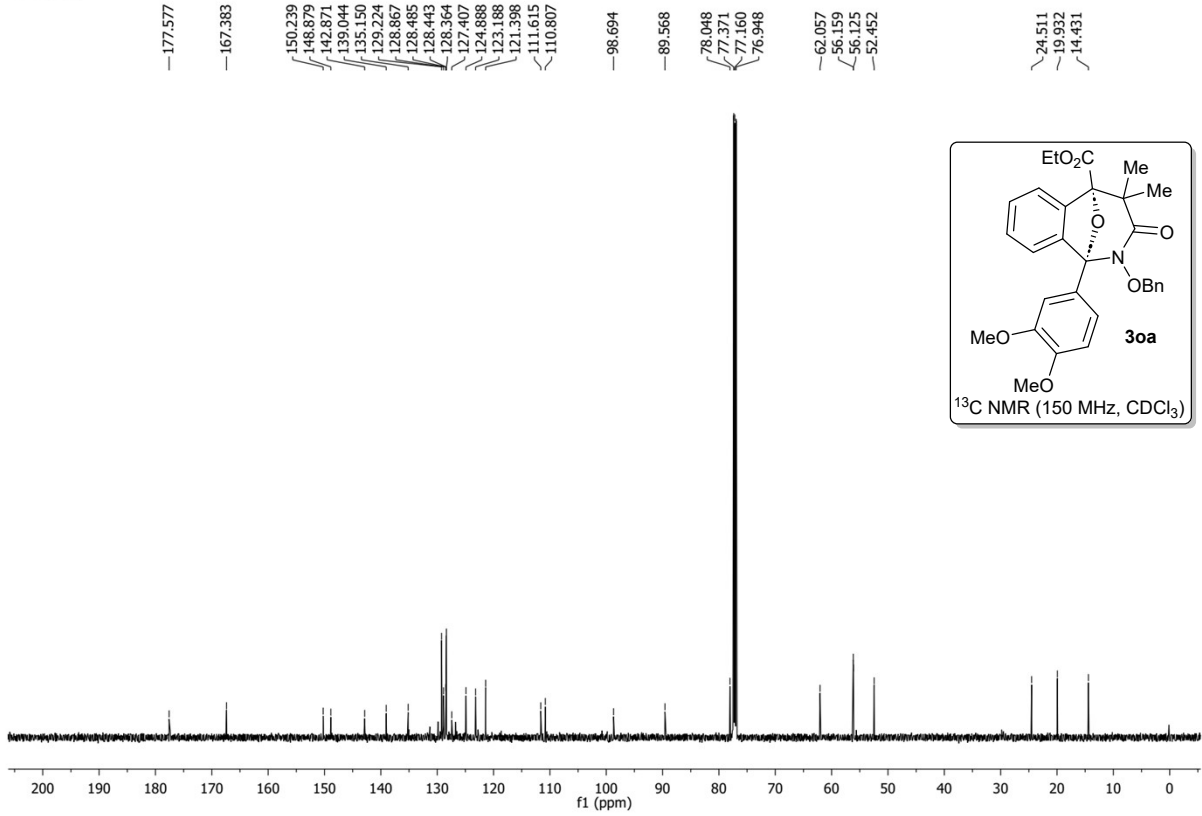

KV-455-1H

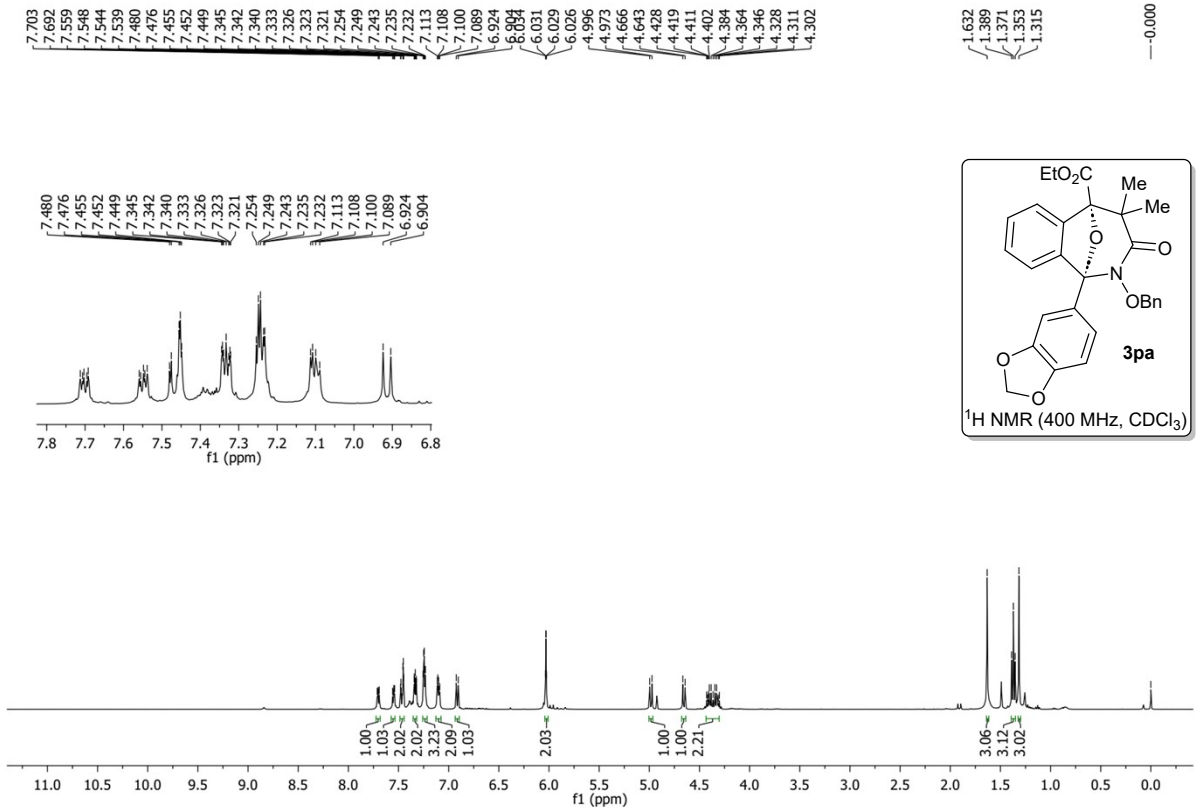

KV-455-13C

—177.695  
—167.306  
148.783  
147.899  
142.499  
138.975  
135.183  
129.540  
129.266  
128.877  
128.449  
128.345  
128.160  
124.823  
123.289  
122.526  
109.099  
108.117  
101.581  
98.638  
89.474  
78.036  
77.372  
77.160  
76.949  
62.061  
52.450  
24.422  
19.839  
14.416

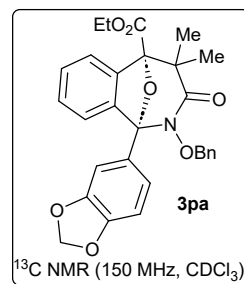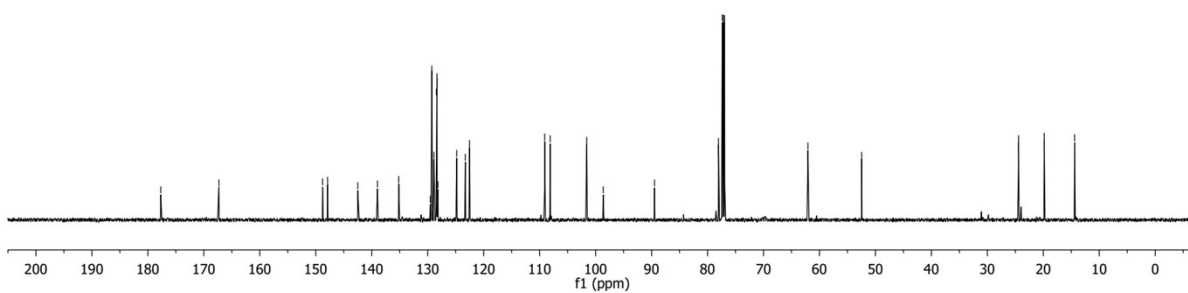

KV-456-1H

7.698  
7.692  
7.685  
7.679  
7.676  
7.631  
7.628  
7.622  
7.616  
7.610  
7.607  
7.600  
7.597  
7.511  
7.508  
7.498  
7.495  
7.495  
7.343  
7.338  
7.329  
7.321  
7.316  
7.260  
7.254  
7.247  
7.244  
7.157  
7.148  
7.144  
7.135  
7.131  
7.122  
7.113  
5.014  
4.991  
4.722  
4.699  
4.450  
4.432  
4.406  
4.388  
4.370  
4.354  
4.336  
4.309  
4.292  
1.638  
1.395  
1.377  
1.359  
1.324  
0.000

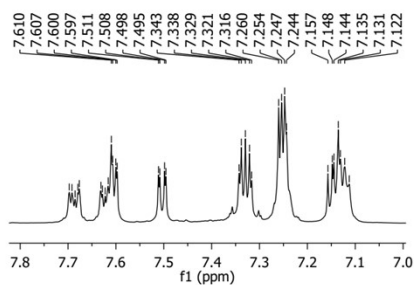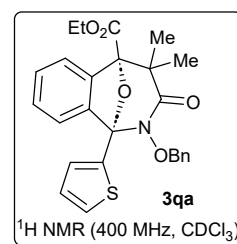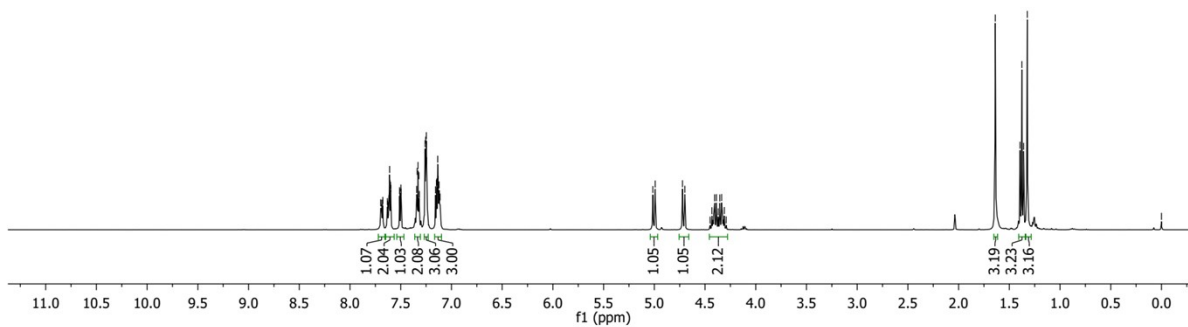

KV-456-13C

— 177.231 — 167.131 — 142.878 — 138.417 — 137.203 — 135.116 — 129.381 — 129.038 — 128.732 — 128.654 — 128.482 — 128.342 — 127.547 — 127.002 — 124.711 — 122.584 — 96.435 — 89.883 — 78.425 — 77.372 — 77.160 — 76.948 — 62.108 — 52.546 — 24.448 — 19.849 — 14.390

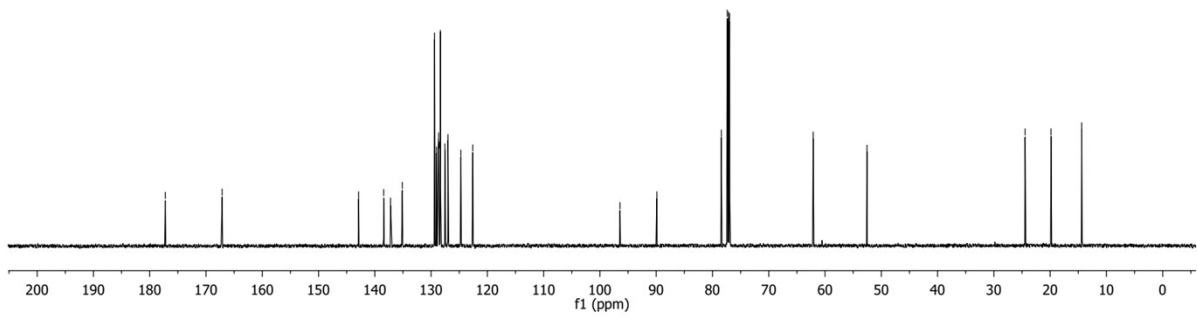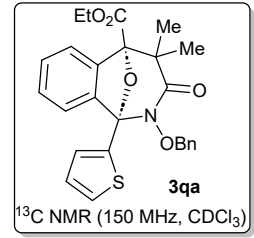

KV-470-1H

8.020 — 8.013 — 8.009 — 8.001 — 7.996 — 7.984 — 7.941 — 7.735 — 7.730 — 7.724 — 7.718 — 7.715 — 7.604 — 7.601 — 7.594 — 7.589 — 7.584 — 7.541 — 7.536 — 7.527 — 7.523 — 7.564 — 7.360 — 7.351 — 7.342 — 7.339 — 7.260 — 7.231 — 7.227 — 7.209 — 7.195 — 7.187 — 7.024 — 7.020 — 7.005 — 7.000 — 4.998 — 4.975 — 4.603 — 4.580 — 3.873 — 1.660 — 1.345

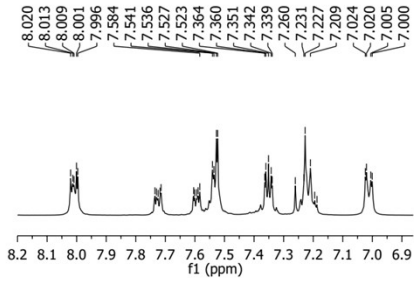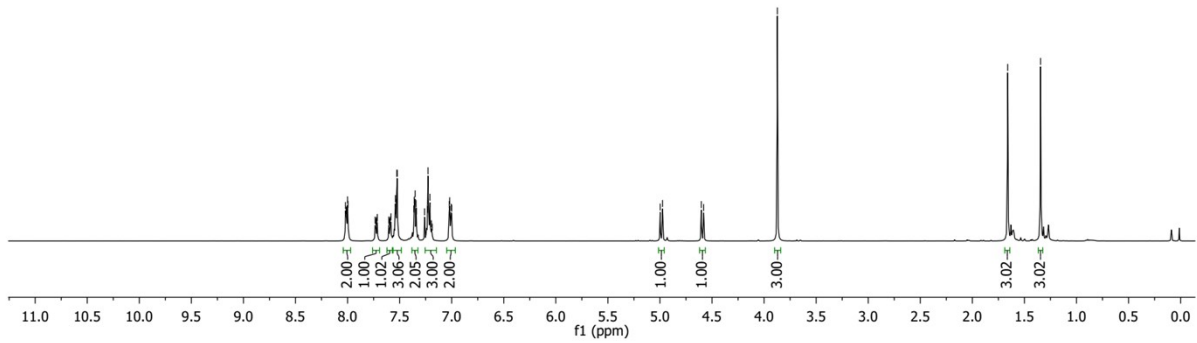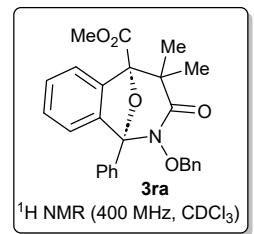

KV-470-13C

—177.554  
 —167.995  
 142.409  
 139.004  
 135.062  
 134.279  
 129.912  
 129.333  
 128.910  
 128.610  
 128.499  
 128.410  
 128.297  
 124.763  
 123.392  
 —98.795  
 —89.782  
 78.022  
 77.415  
 77.160  
 76.906  
 52.712  
 52.532  
 —24.508  
 —19.741

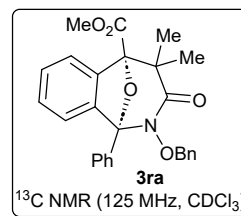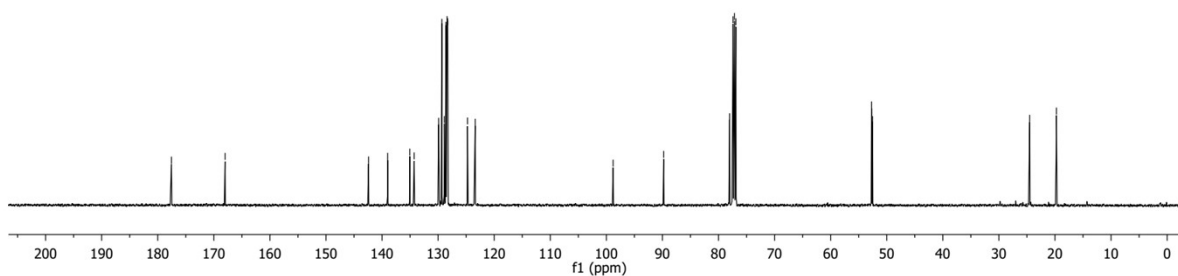

KV-522-1H

7.628  
 7.622  
 7.612  
 7.597  
 7.446  
 7.433  
 7.431  
 7.349  
 7.343  
 7.332  
 7.317  
 7.313  
 7.305  
 7.294  
 7.290  
 7.284  
 7.277  
 7.273  
 7.260  
 5.071  
 5.053  
 4.977  
 4.958  
 4.362  
 4.359  
 4.348  
 4.345  
 4.334  
 4.330  
 4.316  
 1.524  
 1.387  
 1.366  
 1.352  
 1.294

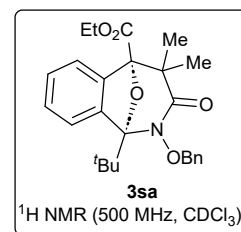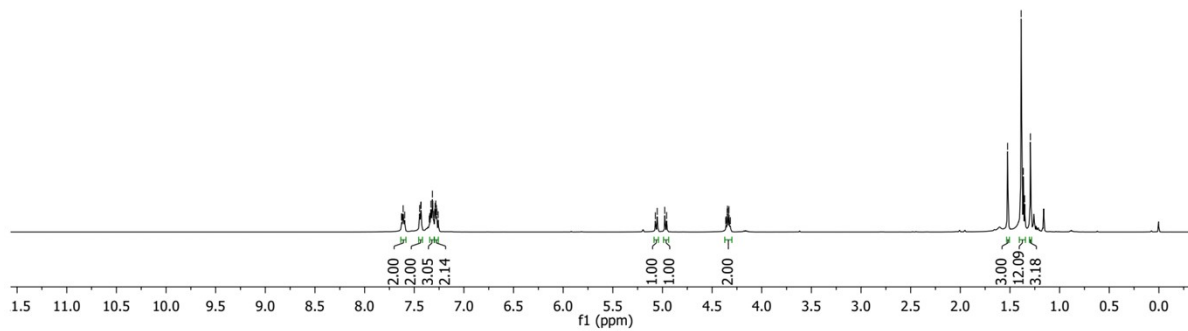



KV-522-13C

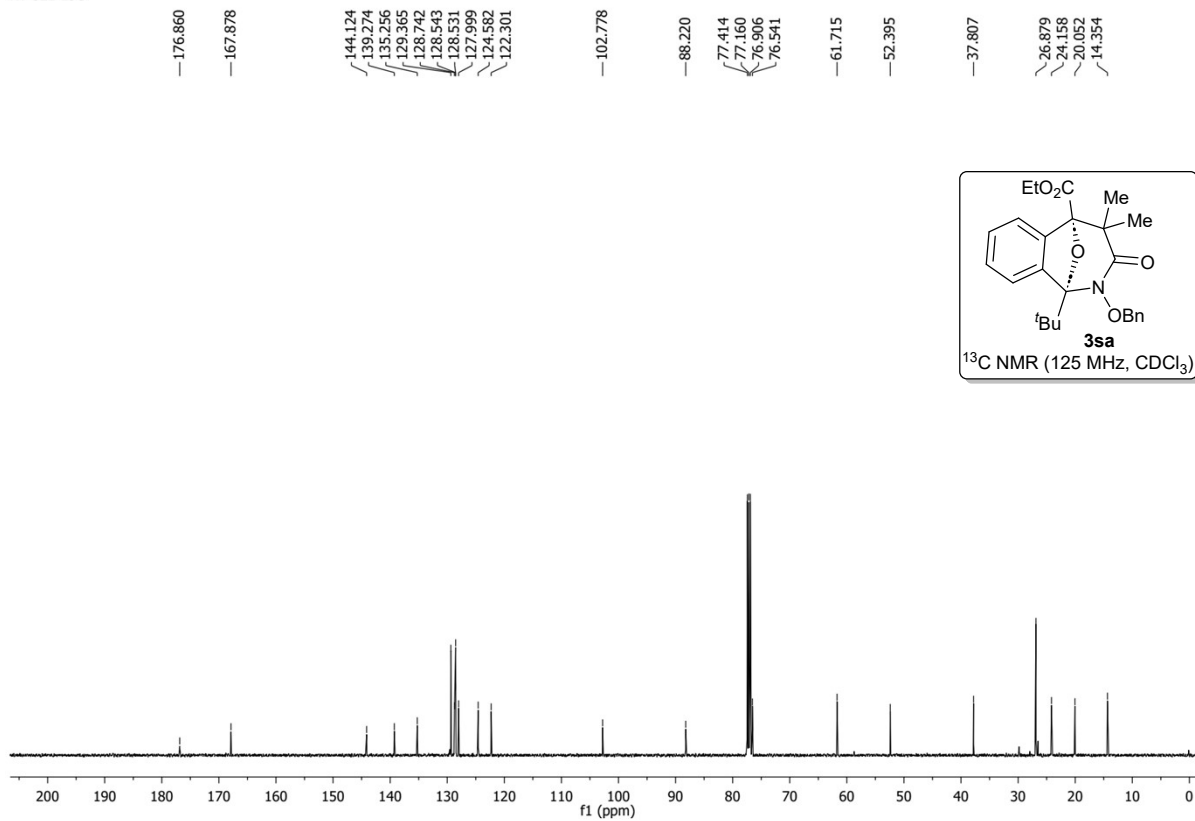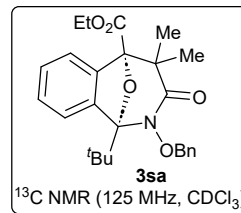

KV-479-1H

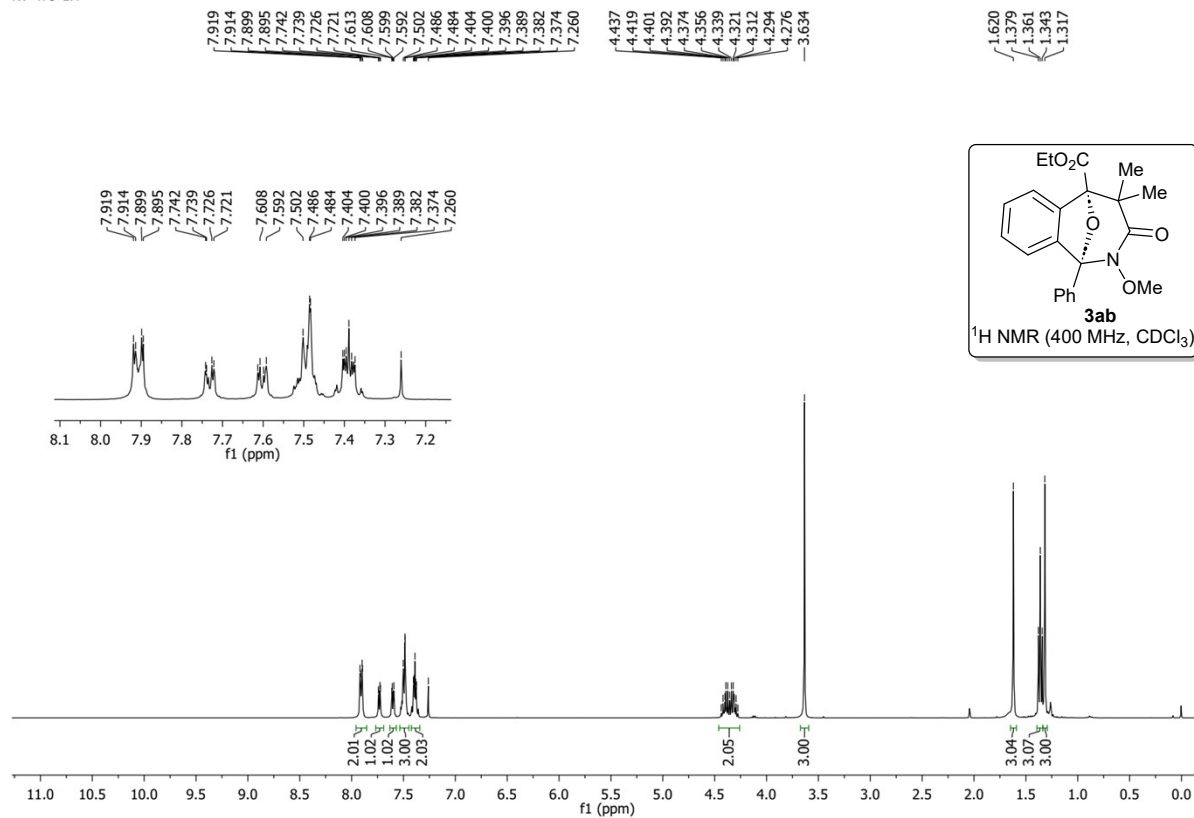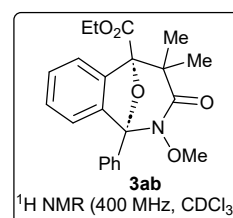

KV-479-13C

—177.881 —167.288  
 142.616 139.060 134.278 129.784 128.919 128.515 128.466 124.870 123.227  
 —98.866 —89.629 77.414 77.160 76.905 63.707 62.032 —52.370  
 24.315 19.812 14.393

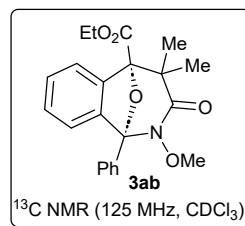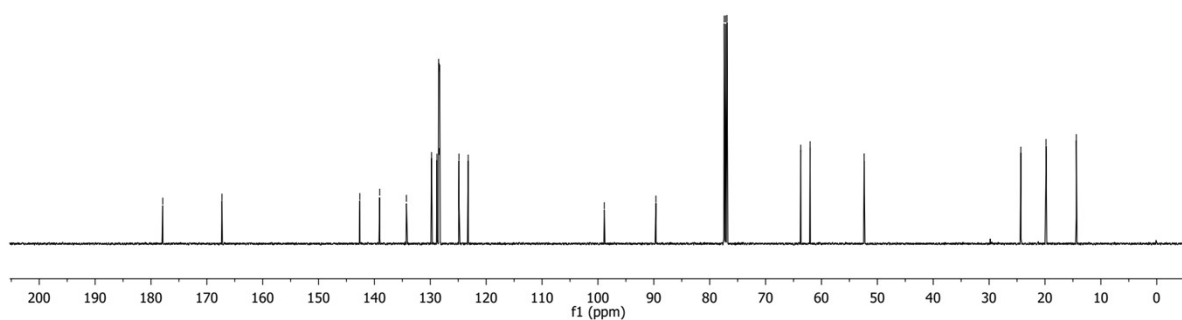

KV-482-1H

7.956 7.951 7.936 7.932 7.728 7.726 7.722 7.712 7.707 7.653 7.649 7.639 7.635 7.512 7.503 7.490 7.474 7.472 7.413 7.409 7.394 7.390 7.381 7.377 7.372 7.363 7.360 7.345 7.341 7.260 4.440 4.422 4.395 4.377 4.360 4.342 4.324 4.315 4.280 4.280 4.297 4.297 4.015 3.998 3.980 3.977 3.959 3.941 3.657 3.639 3.621 3.600 3.582 1.612 1.385 1.367 1.350 1.316 1.002 0.984 0.966

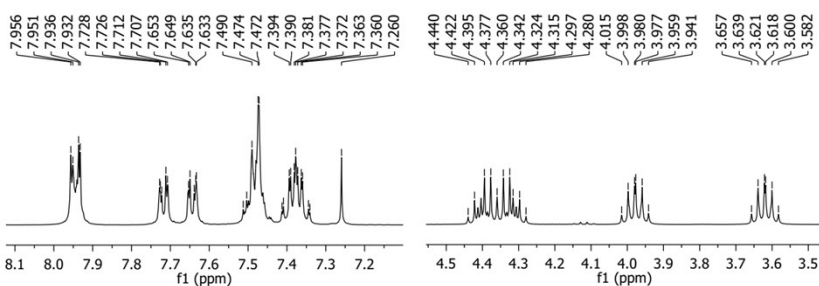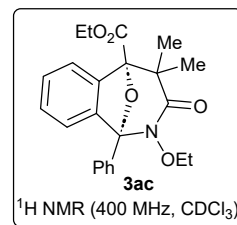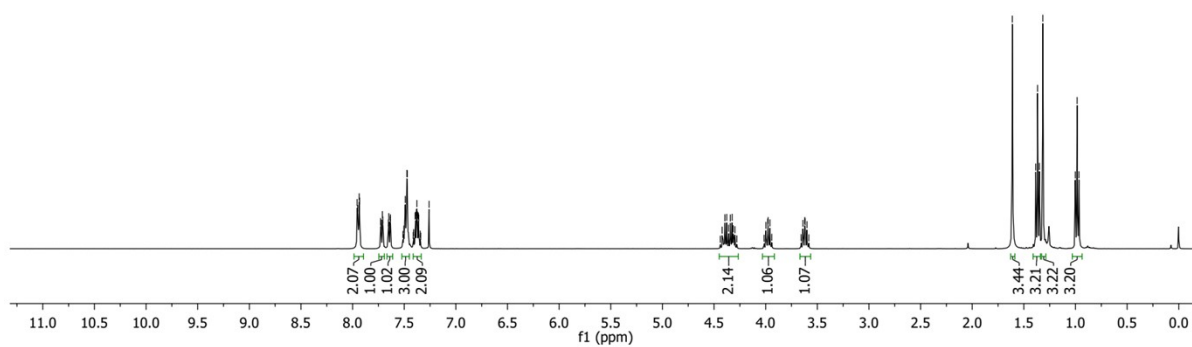

KV-482-13C

—177.288 —167.403  
 142.993 139.055 134.419 129.663 128.825 128.387 128.222 124.839 123.121  
 —98.371 —89.615  
 77.414 77.160 76.906 71.856  
 —62.000 —52.290  
 24.411 19.874 14.404 13.402

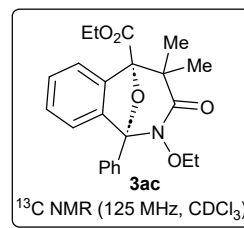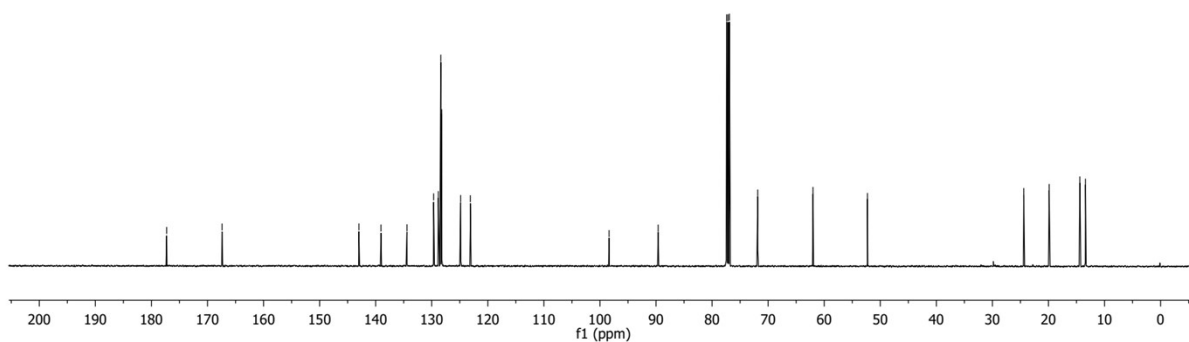

KV-400-1H

7.804 7.788 7.784 7.680 7.677 7.665 7.660 7.656 7.648 7.463 7.477 7.474 7.474 7.463 7.458 7.445 7.441 7.315 7.310 7.300 7.297 7.293 7.273 7.273 7.260 7.254 7.237 7.237 7.210 7.191 7.188 7.188 7.170 7.170 6.966 6.966 6.948 6.948 6.841 6.841 6.838 6.838 6.819 6.819 6.817 6.817  
 1.743 1.405 1.387 1.383 1.370

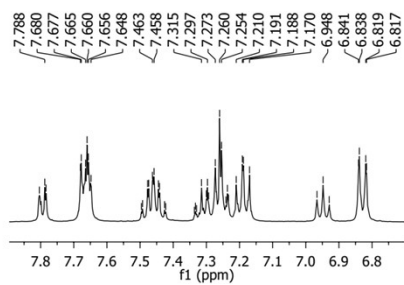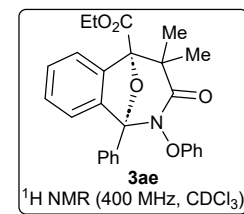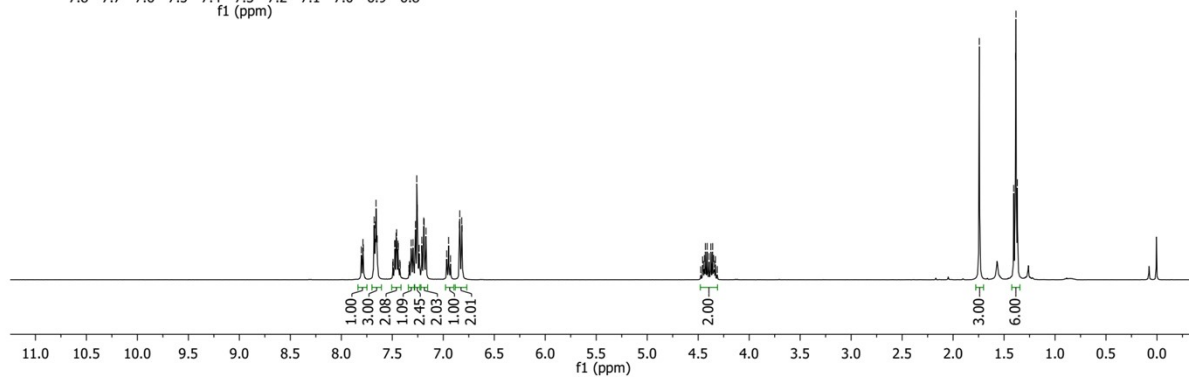

KV-400-13C

—178.221  
—167.137  
—159.295  
142.699  
139.220  
133.329  
129.758  
129.149  
129.064  
128.835  
128.432  
128.277  
124.846  
123.676  
122.538  
—114.045  
—100.480  
—89.908  
77.414  
77.160  
76.906  
—62.185  
—53.448  
24.317  
19.810  
14.438

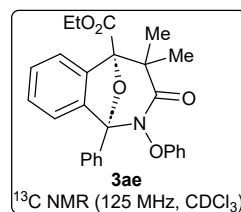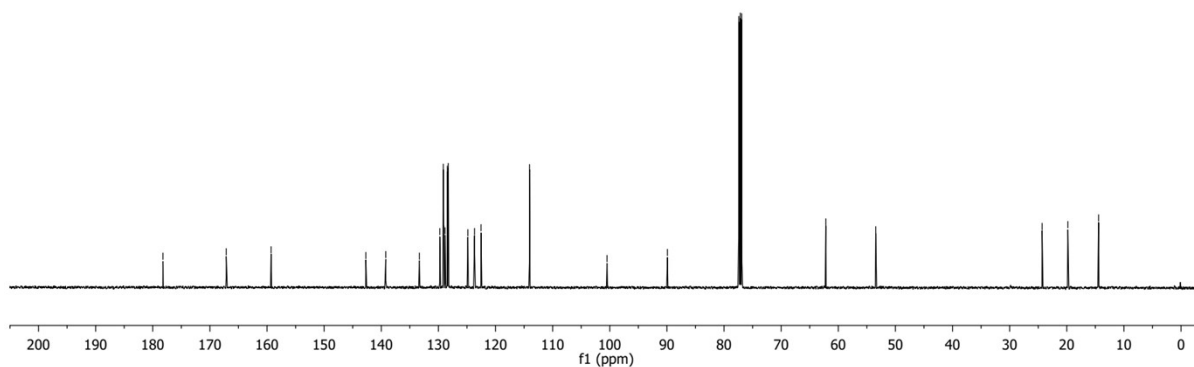

KV-487-1H

7.953  
7.947  
7.937  
7.933  
7.928  
7.928  
7.728  
7.726  
7.722  
7.713  
7.708  
7.707  
7.650  
7.649  
7.644  
7.635  
7.631  
7.628  
7.495  
7.487  
7.481  
7.477  
7.397  
7.393  
7.389  
7.384  
7.378  
7.372  
7.366  
7.363  
7.363  
7.260  
5.729  
5.705  
5.684  
5.666  
5.660  
5.097  
5.094  
5.091  
5.068  
5.064  
5.054  
5.050  
4.424  
4.424  
4.397  
4.380  
4.345  
4.327  
4.318  
4.309  
4.300  
4.300  
4.122  
4.119  
4.119  
4.104  
4.092  
4.079  
1.610  
1.388  
1.370  
1.353  
1.315

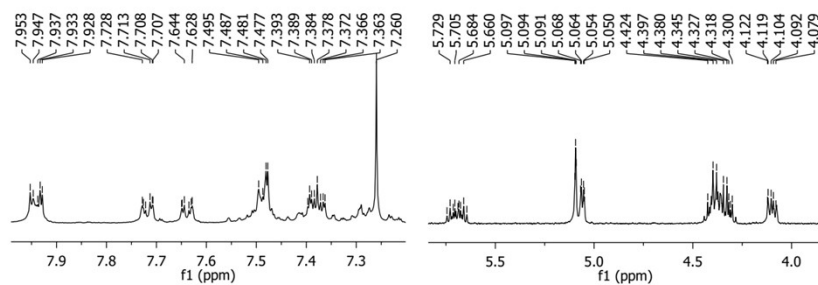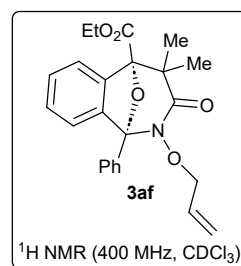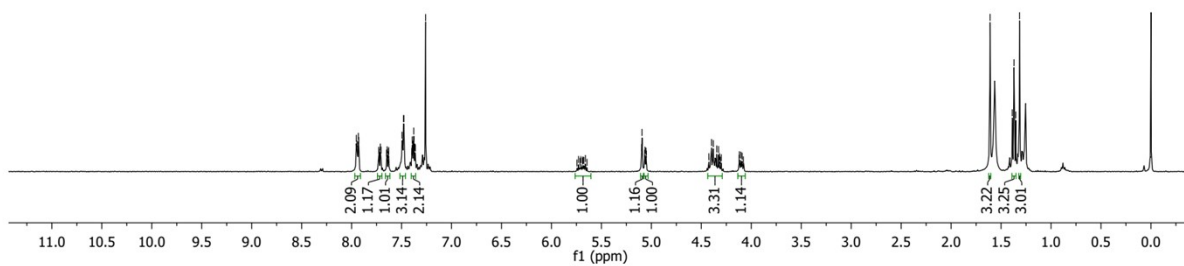

KV-487-13C

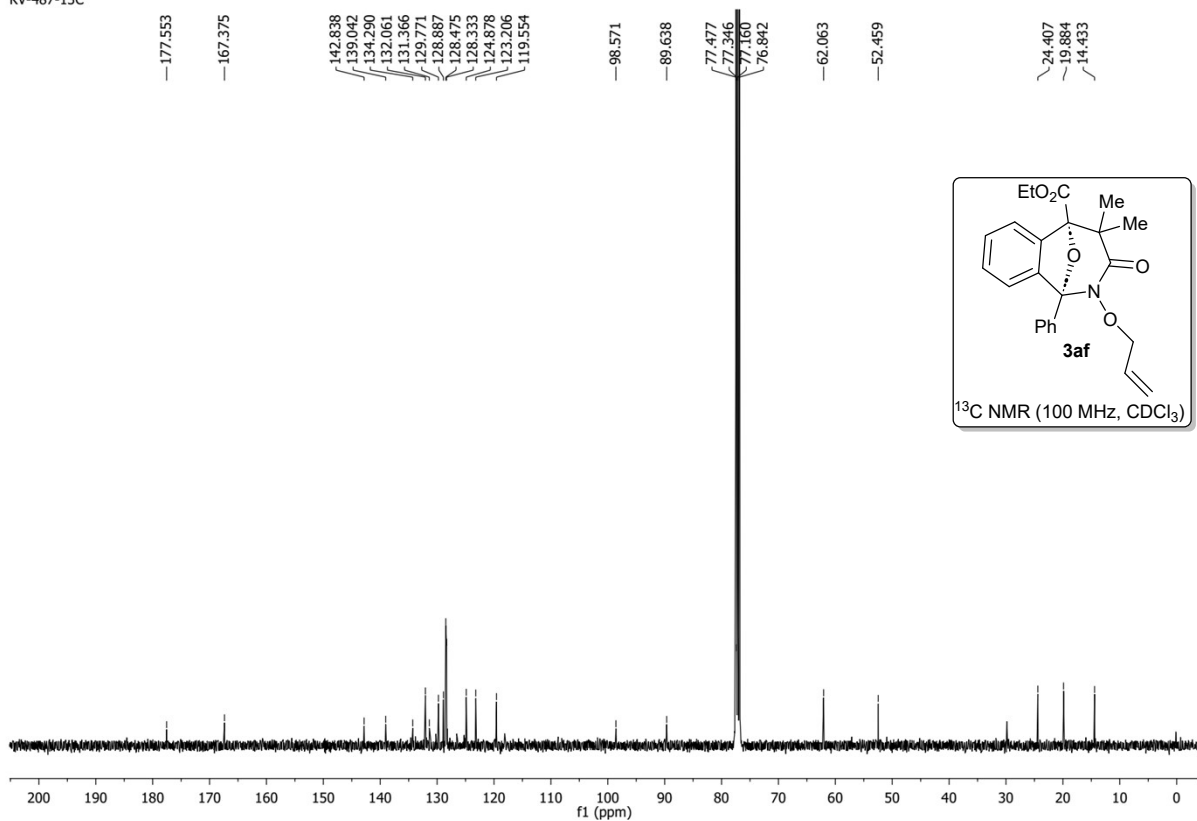

KV-492-1H

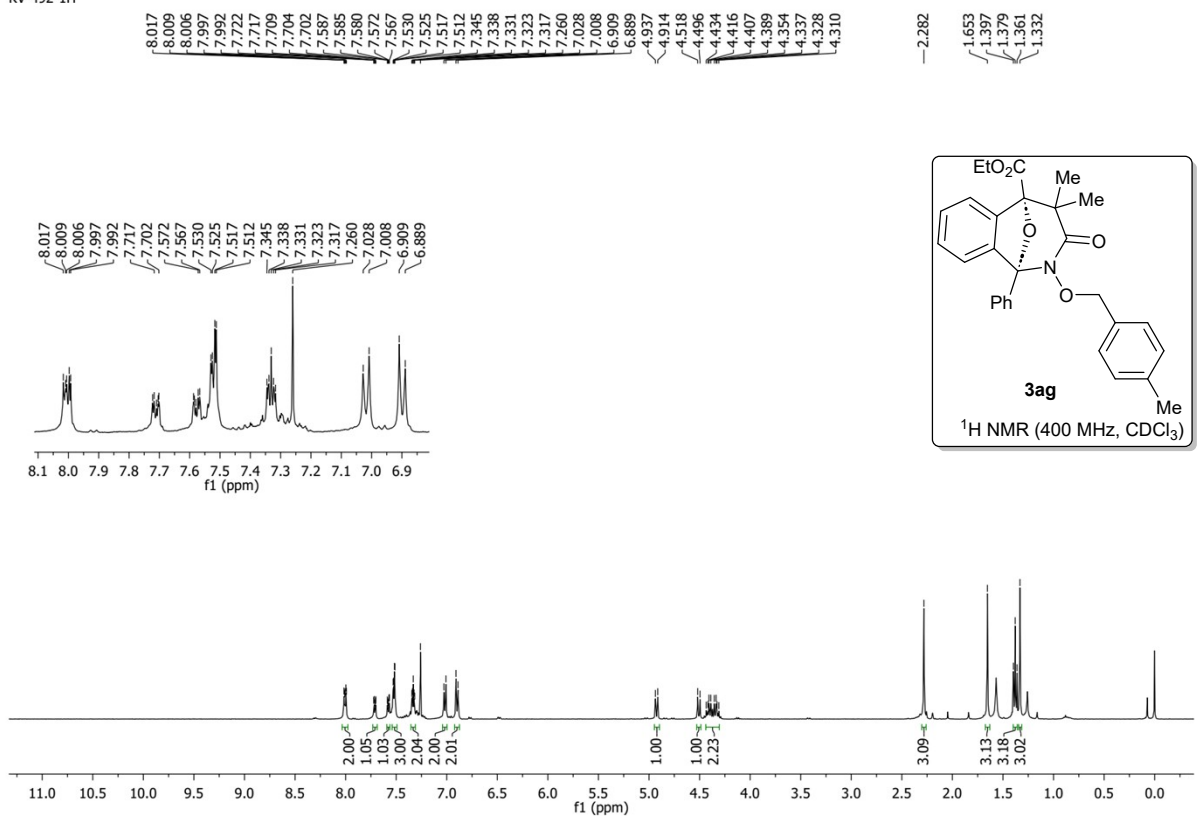

KV-492-13C

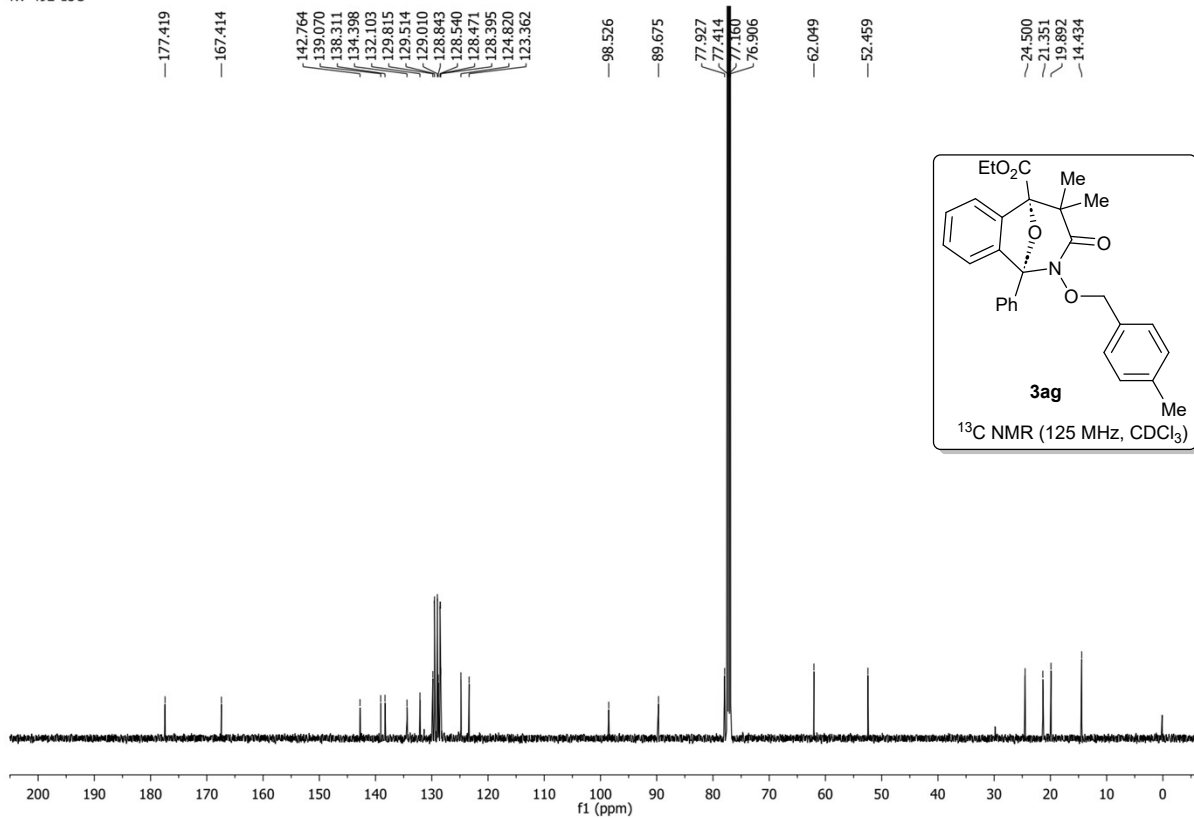

KV-516-1H

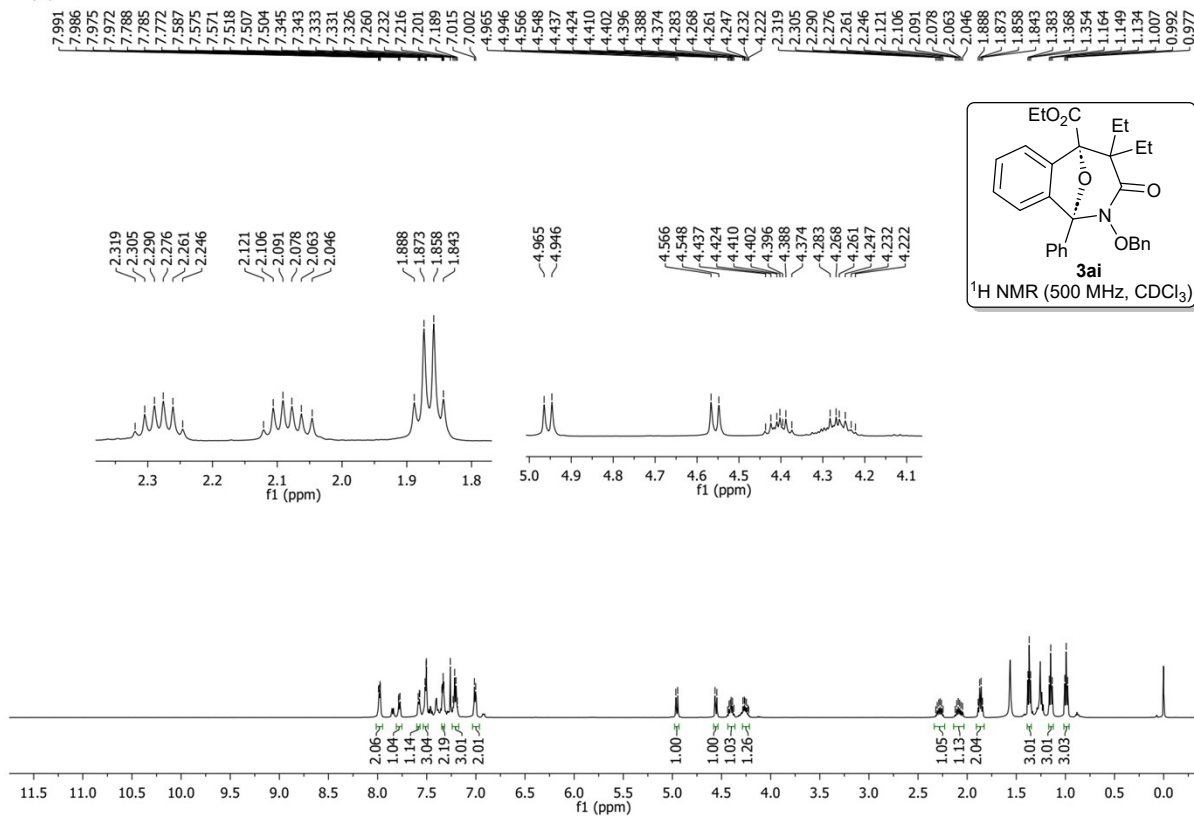

KV-516-13C

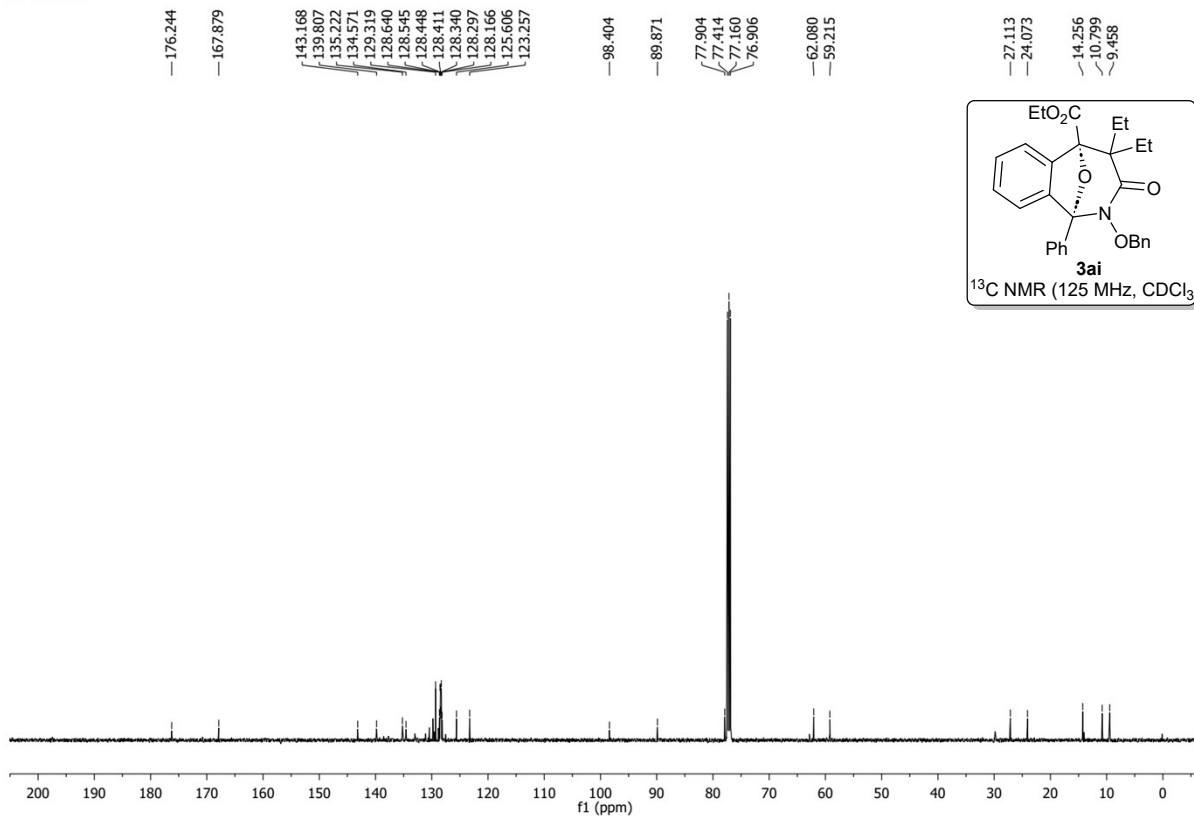

KV-CYD-1H

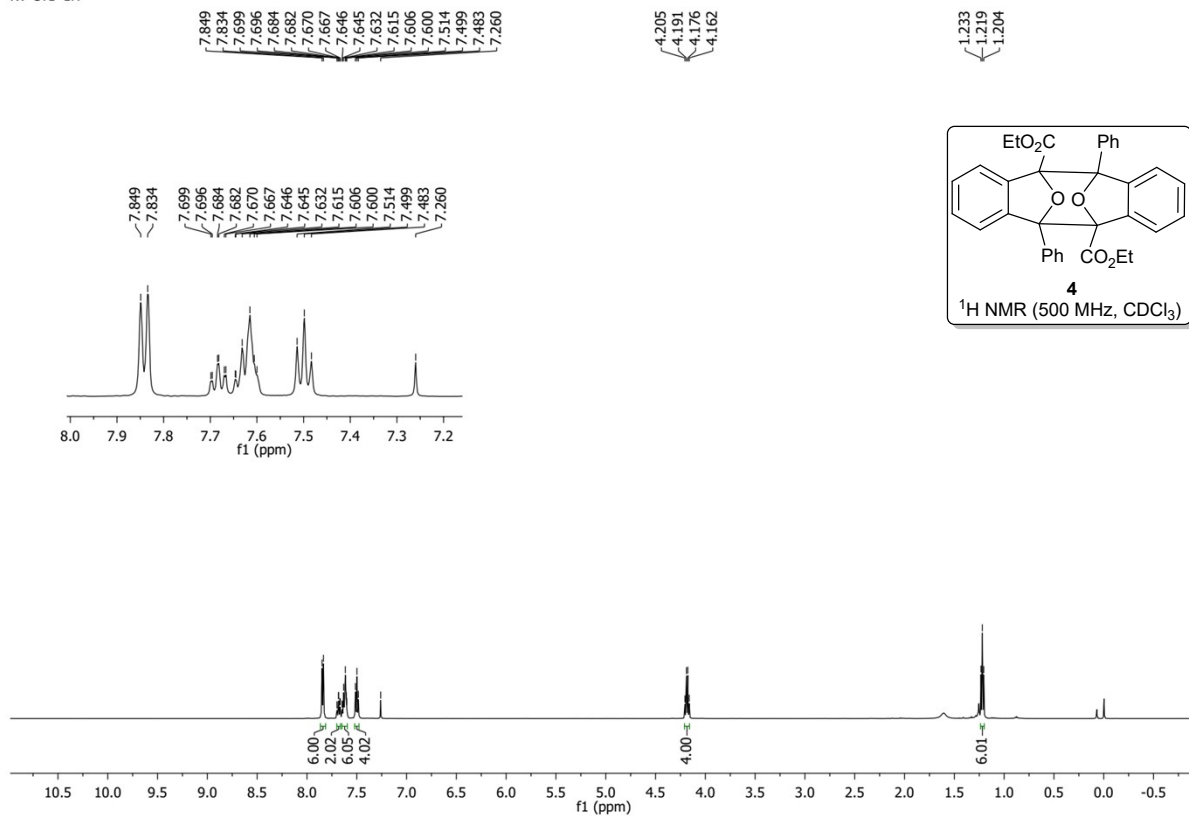

KV-CYD-13C

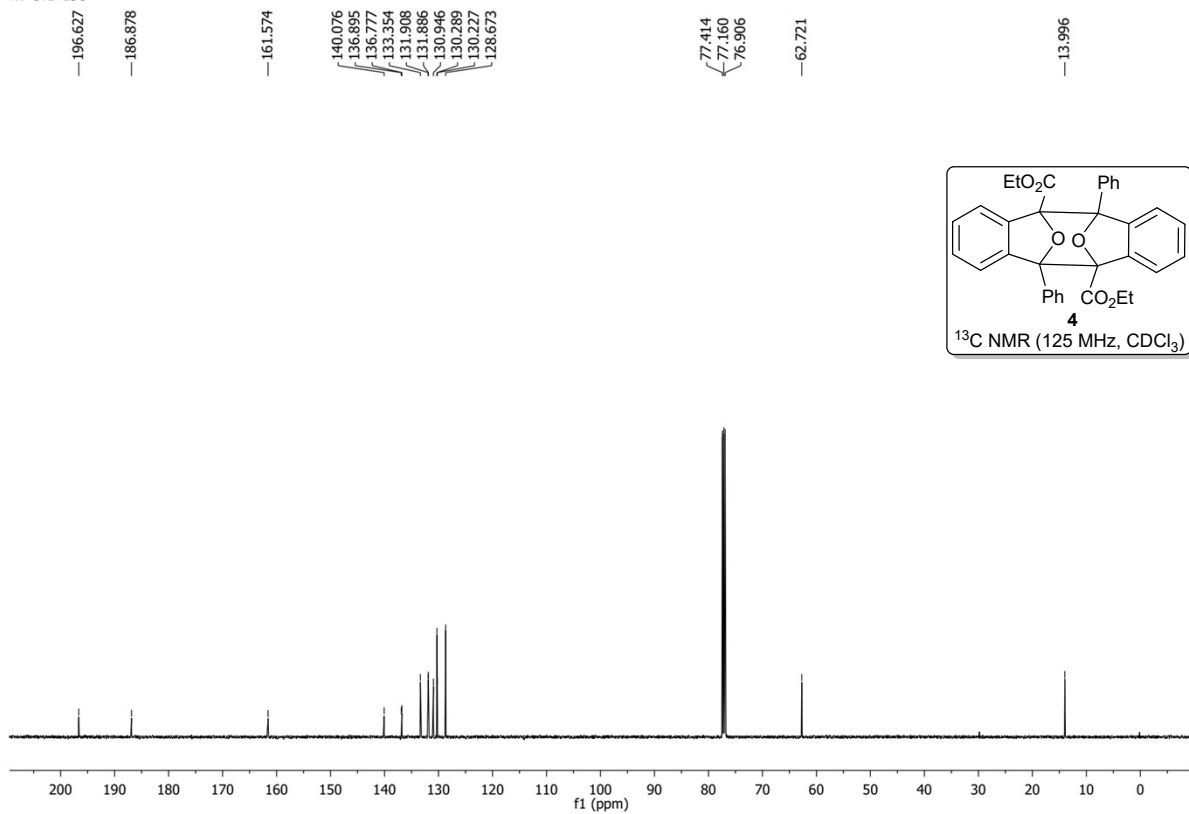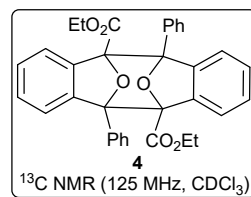

KV-486-1H

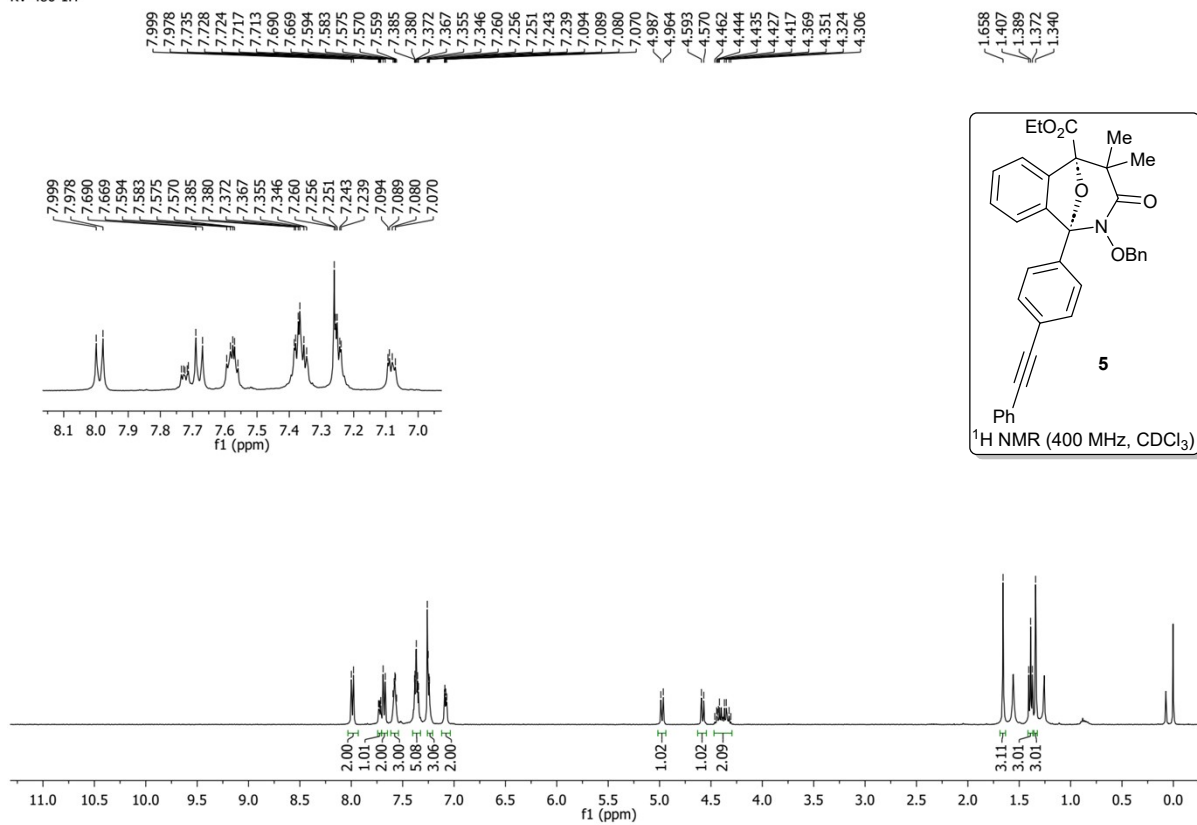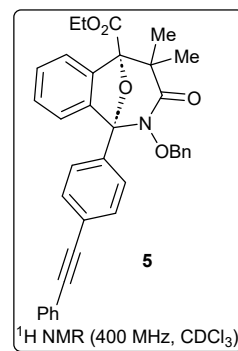



KV-486-13C

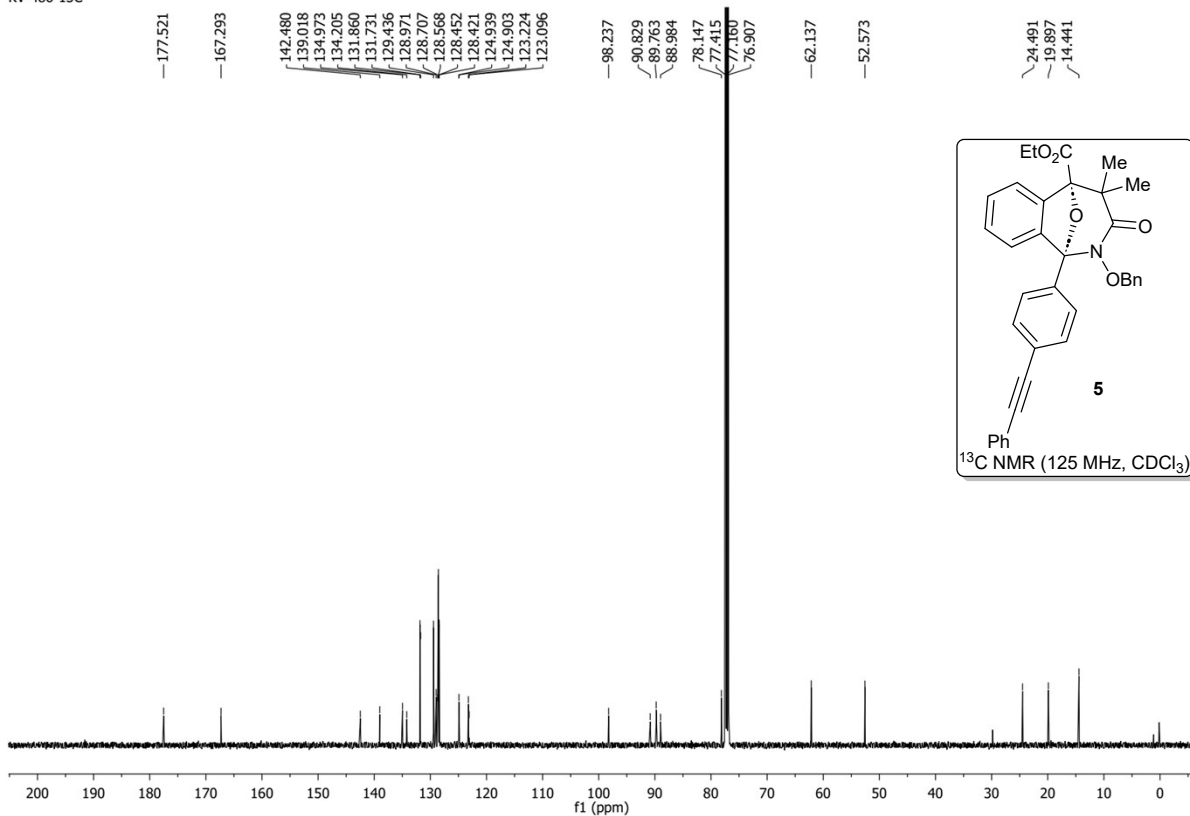

KV-478-1H

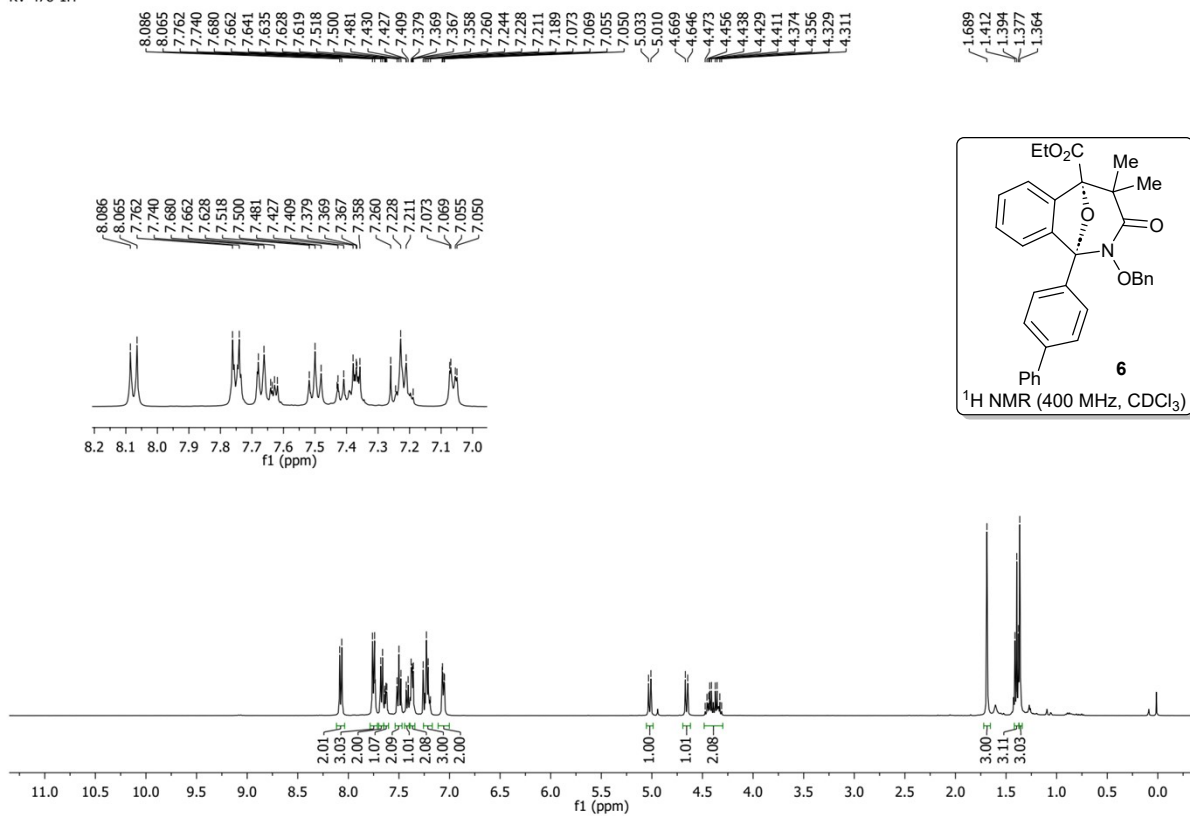

KV-478-13C

—177.553  
—167.349  
142.681  
140.581  
139.060  
135.116  
133.270  
129.367  
129.040  
128.902  
128.885  
128.468  
128.322  
127.875  
127.367  
127.246  
124.849  
123.305  
—98.542  
—89.701  
78.129  
77.414  
77.160  
76.905  
—62.065  
—52.534  
24.491  
19.887  
14.428

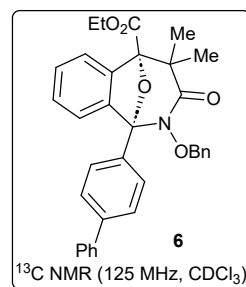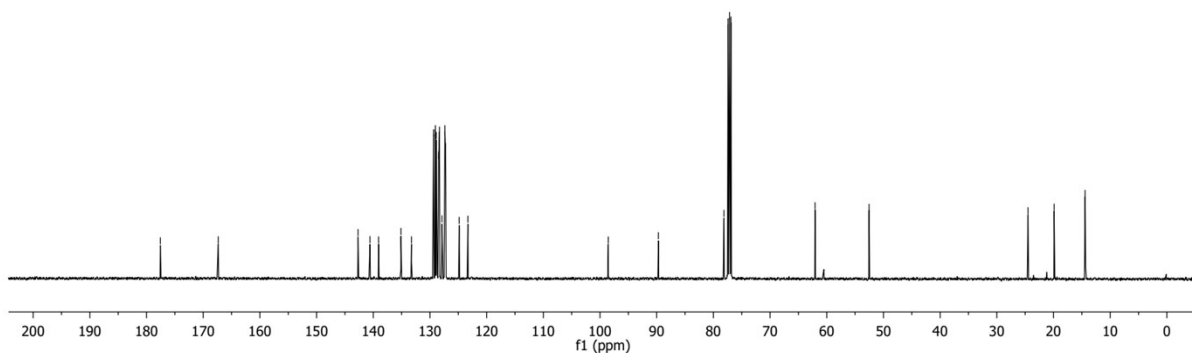

KV-LIBH4-1H

7.986  
7.981  
7.978  
7.973  
7.970  
7.963  
7.951  
7.546  
7.539  
7.535  
7.530  
7.527  
7.377  
7.375  
7.375  
7.363  
7.353  
7.351  
7.340  
7.336  
7.336  
7.329  
7.324  
7.322  
7.312  
7.310  
7.260  
7.227  
7.215  
7.212  
7.207  
7.195  
7.184  
7.181  
6.890  
6.890  
6.978  
6.975  
4.975  
4.960  
4.615  
4.600  
4.229  
4.209  
4.159  
4.138  
—1.658  
—1.164

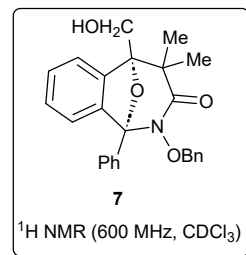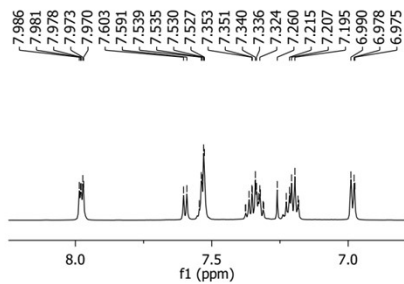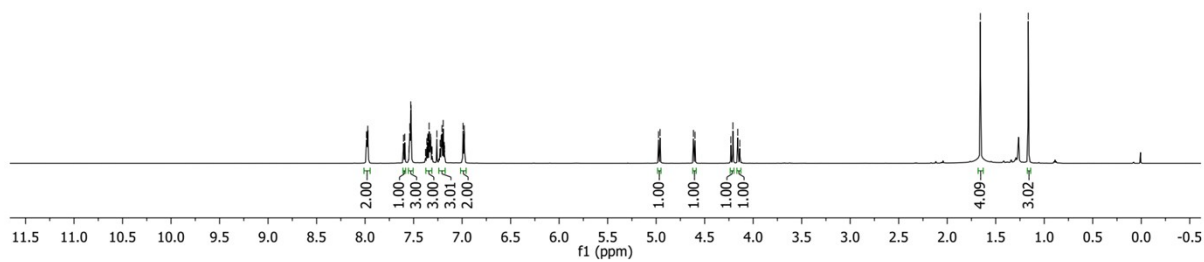

KV-LIBH4-13C

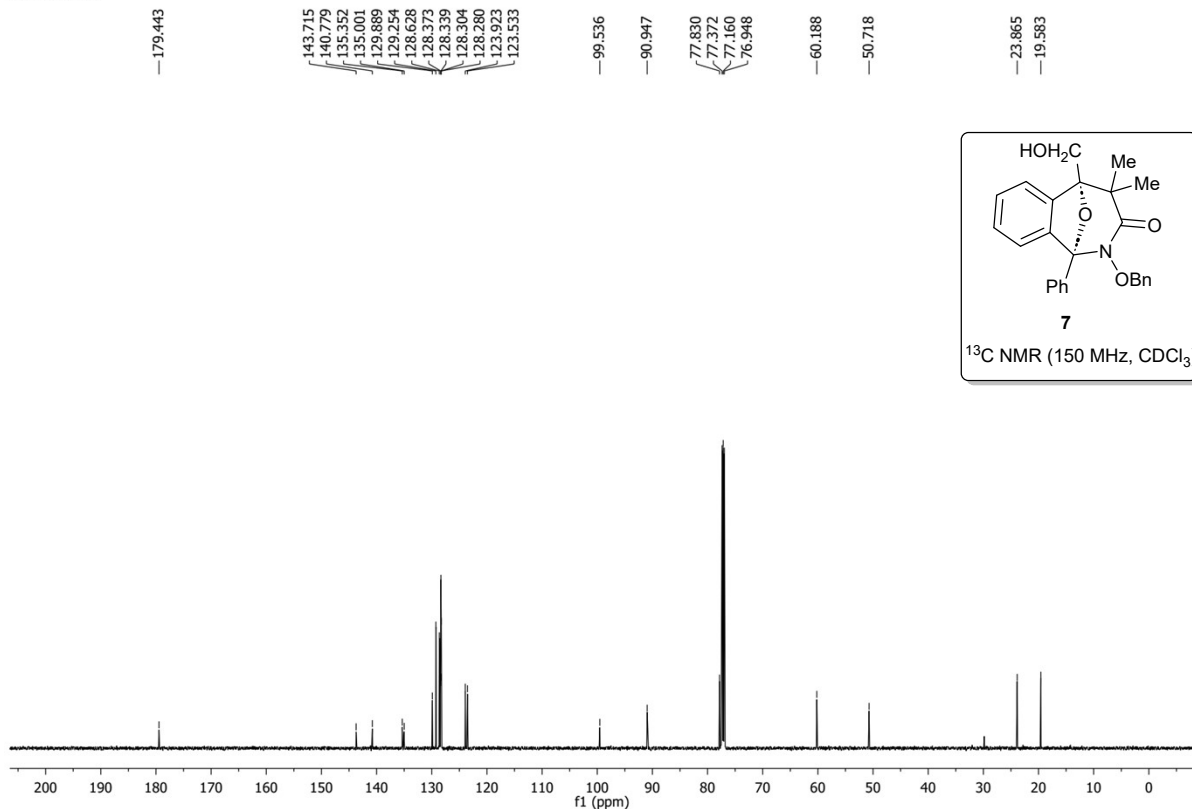

KV-521-1H

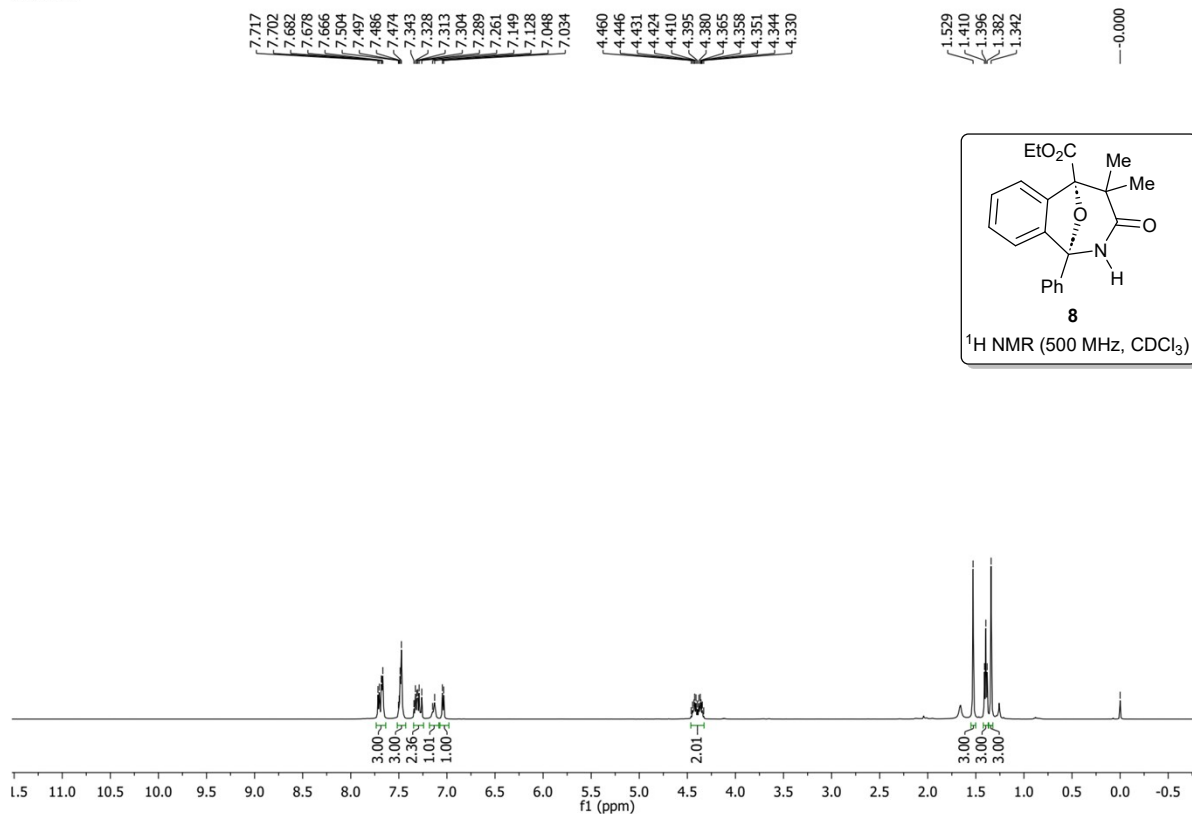

KV-521-13C

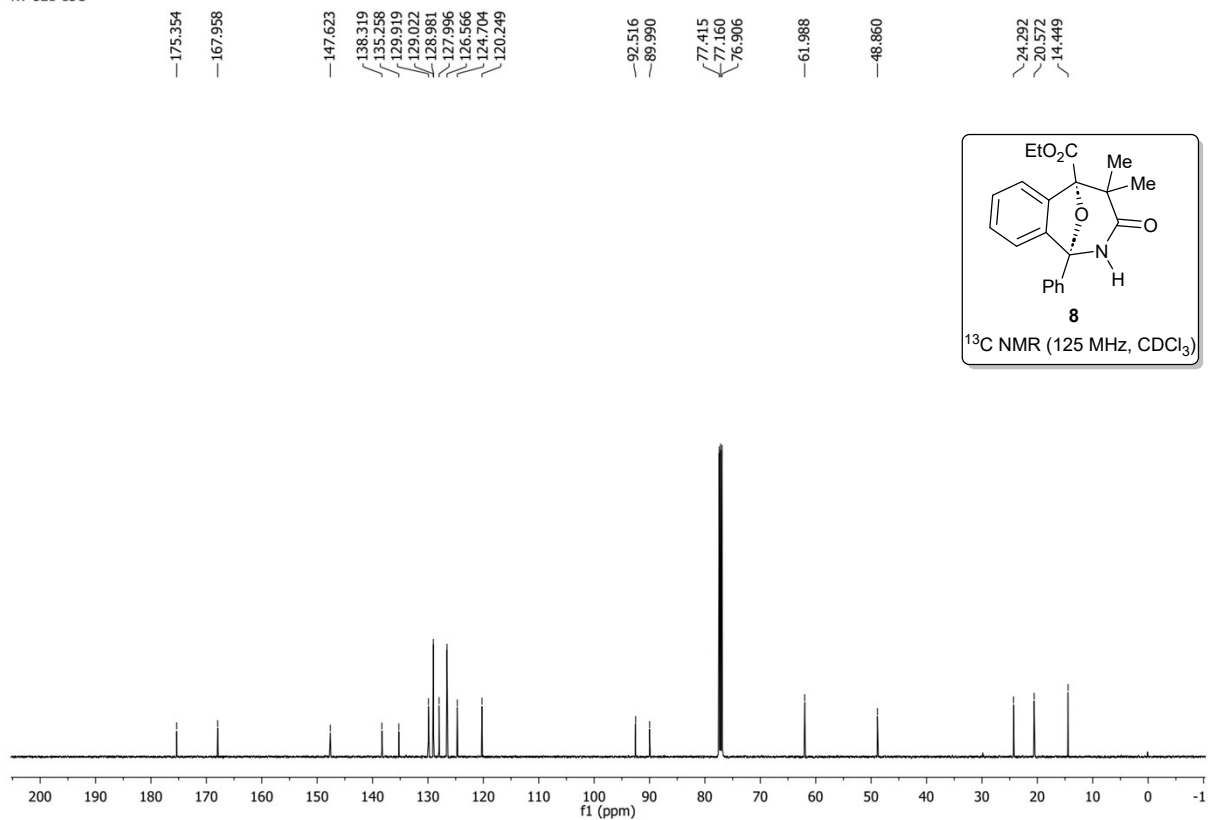

Supplement: d4cc04946b1.pdf [file d4cc04946b1.pdf]
